# Supplementary material for: LGR5 marks targetable tumor-initiating cells in mouse liver cancer
Source: PubMed Central journal article supplement (PMC7181628; doi:10.1038/s41467-020-15846-0), 2020-04-23
Supplement: 41467_2020_15846_MOESM1_ESM.pdf [file 41467_2020_15846_MOESM1_ESM.pdf]

1 **Supplementary Information for:**

2

3 **LGR5 marks targetable tumor-initiating**  
4 **cells in mouse liver cancer**

5 **Cao et al**

6 **Table of contents**

7 Supplementary Figure 1

8 Supplementary Figure 2

9 Supplementary Figure 3

10 Supplementary Figure 4

11 Supplementary Figure 5

12 Supplementary Figure 6

13 Supplementary Figure 7

14 Supplementary Figure 8

15 Supplementary Figure 9

16 Supplementary Figure 10

17 Supplementary Figure 11

18 Supplementary Figure 12

19 Supplementary Figure 13

20 Supplementary Figure 14

- 21 Supplementary Table 1
- 22 Supplementary Table 2
- 23 Supplementary Table 3
- 24 Supplementary Table 4
- 25 Supplementary Note
- 26

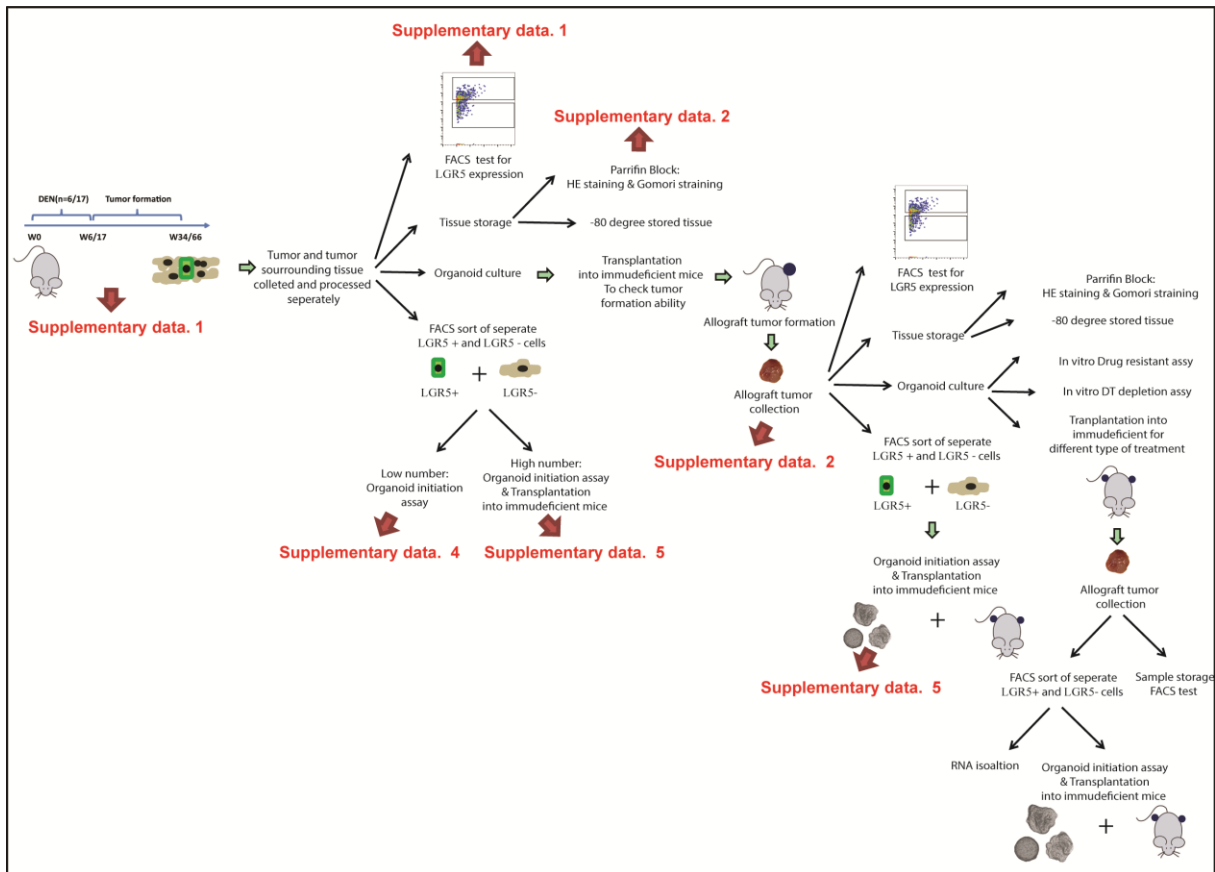

27

28 **Supplementary Figure 1 | General flowchart of the experimental design.**

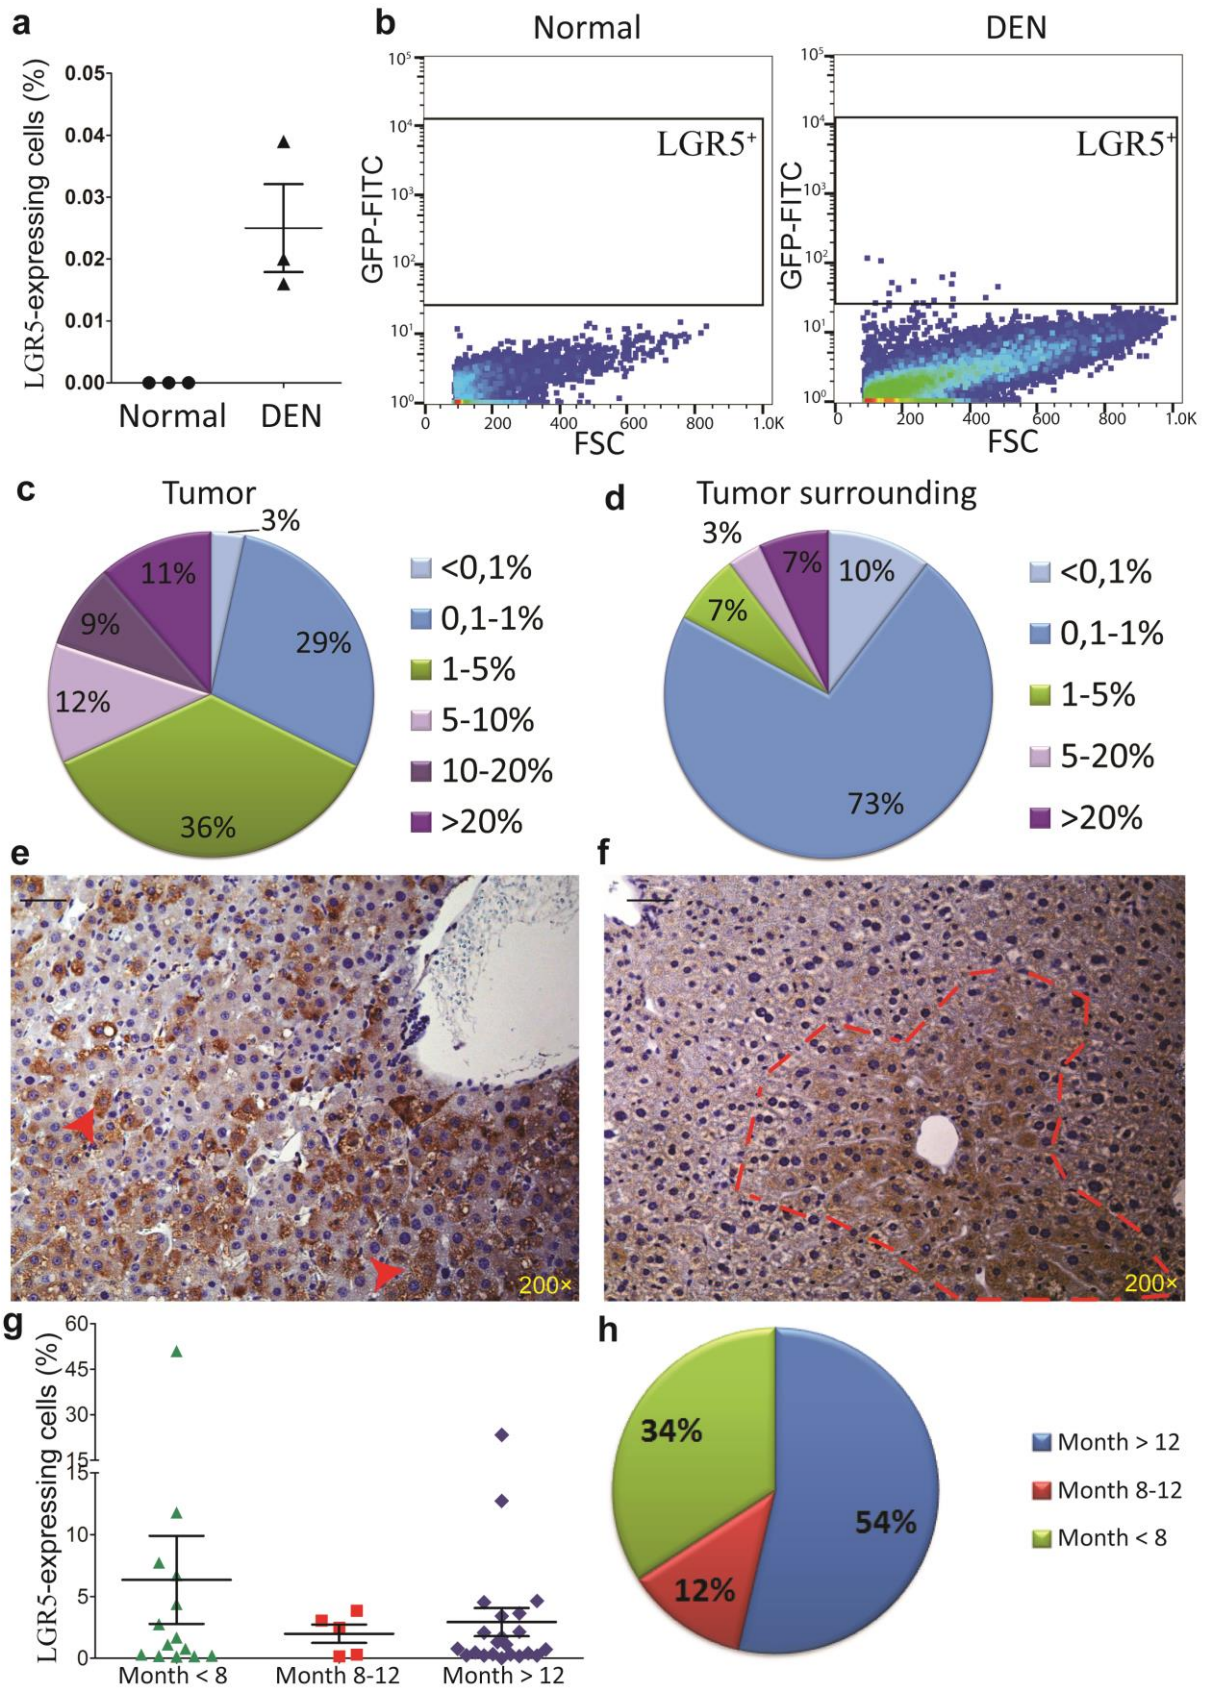

29

30 **Supplementary Figure 2 | LGR5 expressing cells are present in the DEN-induced primary liver tumor.**

31 **a, LGR5<sup>+</sup> cells are present in the liver upon DEN administration (Post DEN induction day 7). b,**

32 Representative FACS plots showing that LGR5<sup>+</sup> cells are present in the liver following DEN  
33 administration (Post DEN induction day 7). **c**, Relative LGR5<sup>+</sup> fraction in DEN-induced liver tumors. **d**,  
34 Relative LGR5<sup>+</sup> fraction in tissue bordering the DEN-induced liver tumors (denominated as  
35 surrounding). **e-f**, Representative immunohistochemistry pictures showing the microscopic aspect of  
36 the LGR5<sup>+</sup> cells in liver cancer. Two types of LGR5<sup>+</sup> cell distribution patterns are apparent, scattered  
37 LGR5<sup>+</sup> cell distribution (**e**) and LGR5<sup>+</sup> island-like clusters (**f**). The pictures show an anti-GFP  
38 immunohistochemistry staining in which LGR5<sup>+</sup> cells are brown and nuclei are blue. Scale bar = 50µm.  
39 **g**, The percentage of LGR5-expressing cells within each tissue, grouped by tumor collection month  
40 (the month is counted since the first administration of DEN). Mean ± SEM. **(h)** Relative mice number  
41 fraction in all DEN-induced mice, grouped by tumor collection month. Source data are provided as a  
42 Source Data file.

43

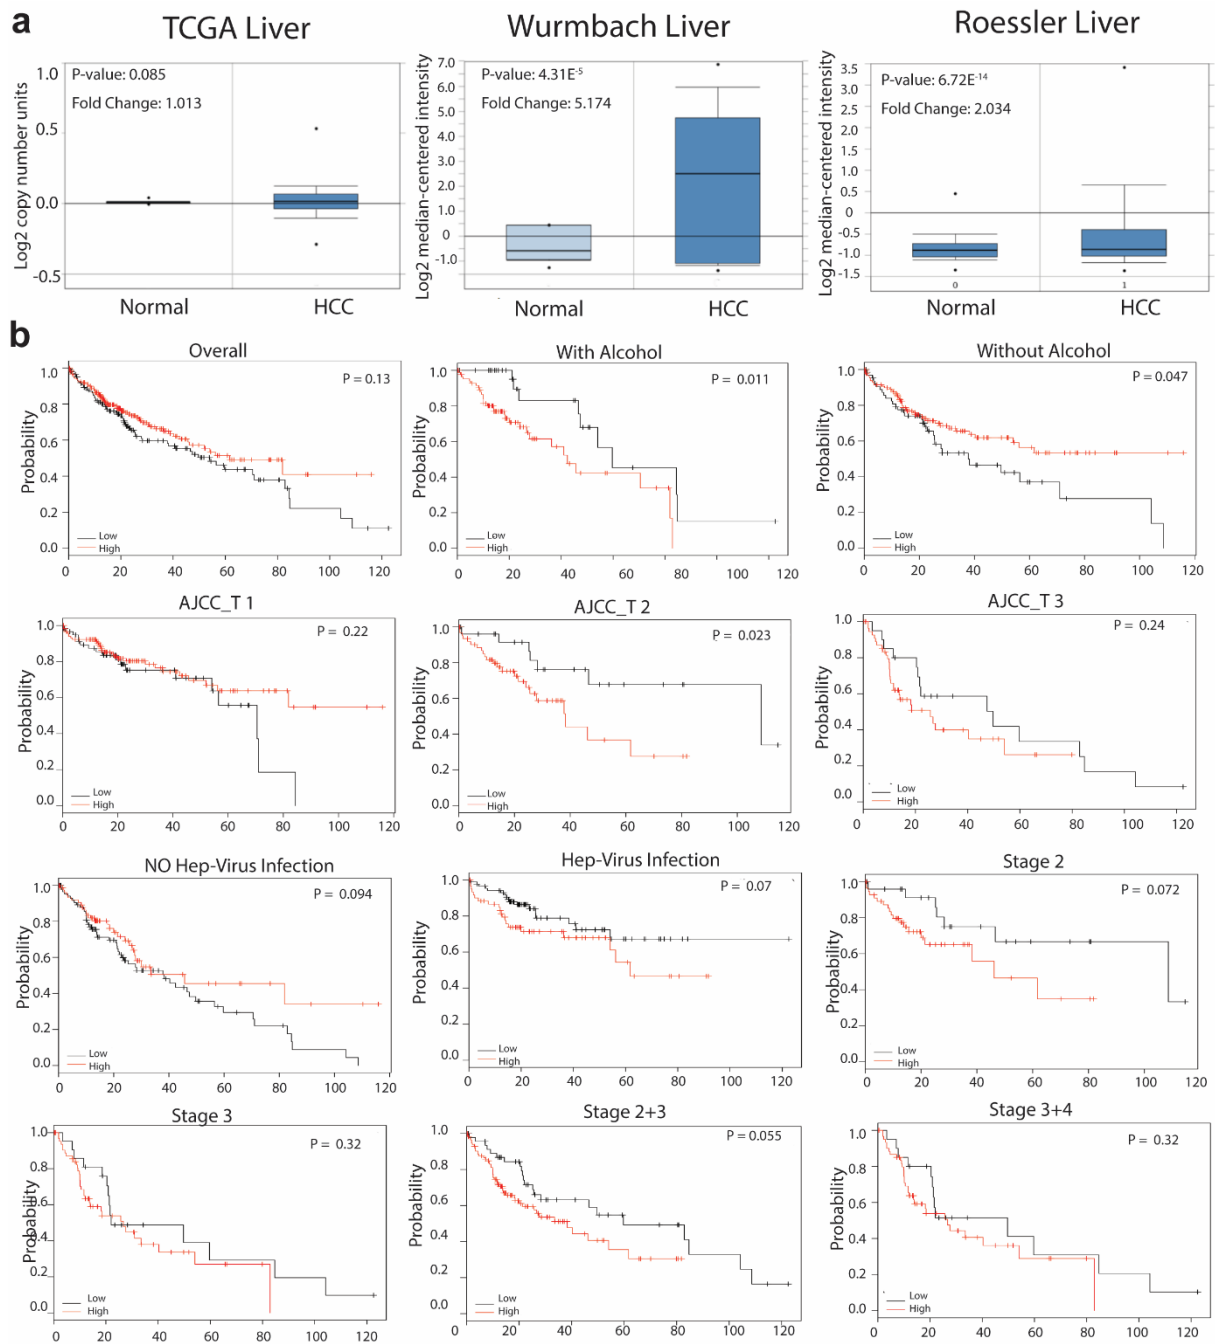

44

45 **Supplementary Figure 3 | *LGR5* expression in HCC tissues and relation to patient outcome.** **a**, The  
 46 upregulated expression of *LGR5* in HCC tissues compared with normal tissues from TCGA Liver cohort  
 47 (Normal vs. HCC:  $n = 115$  vs.  $n = 97$ ,  $P = 0.085$ , Fold change: 1.013), Wurmbach liver cohort (Normal vs.  
 48 HCC:  $n = 10$  vs.  $n = 35$ ,  $P = 4.31E^{-5}$ , Fold change: 5.174) and Roessler liver cohort (Normal vs. HCC:  $n =$   
 49  $200$  vs.  $n = 225$ ,  $P = 6.72E^{-14}$ , Fold change: 2.034). **b**, Kaplan-Meier curve for HCC of patients based on  
 50 different etiology/tumor stage of HCC from TCGA Liver cohort. AJCC\_T: American Joint Committee on  
 51 Cancer (AJCC) tumor staging system; Stage: Barcelona Clinic Liver Cancer (BCLC) tumor staging system.  
 52 Source data are provided as a Source Data file.

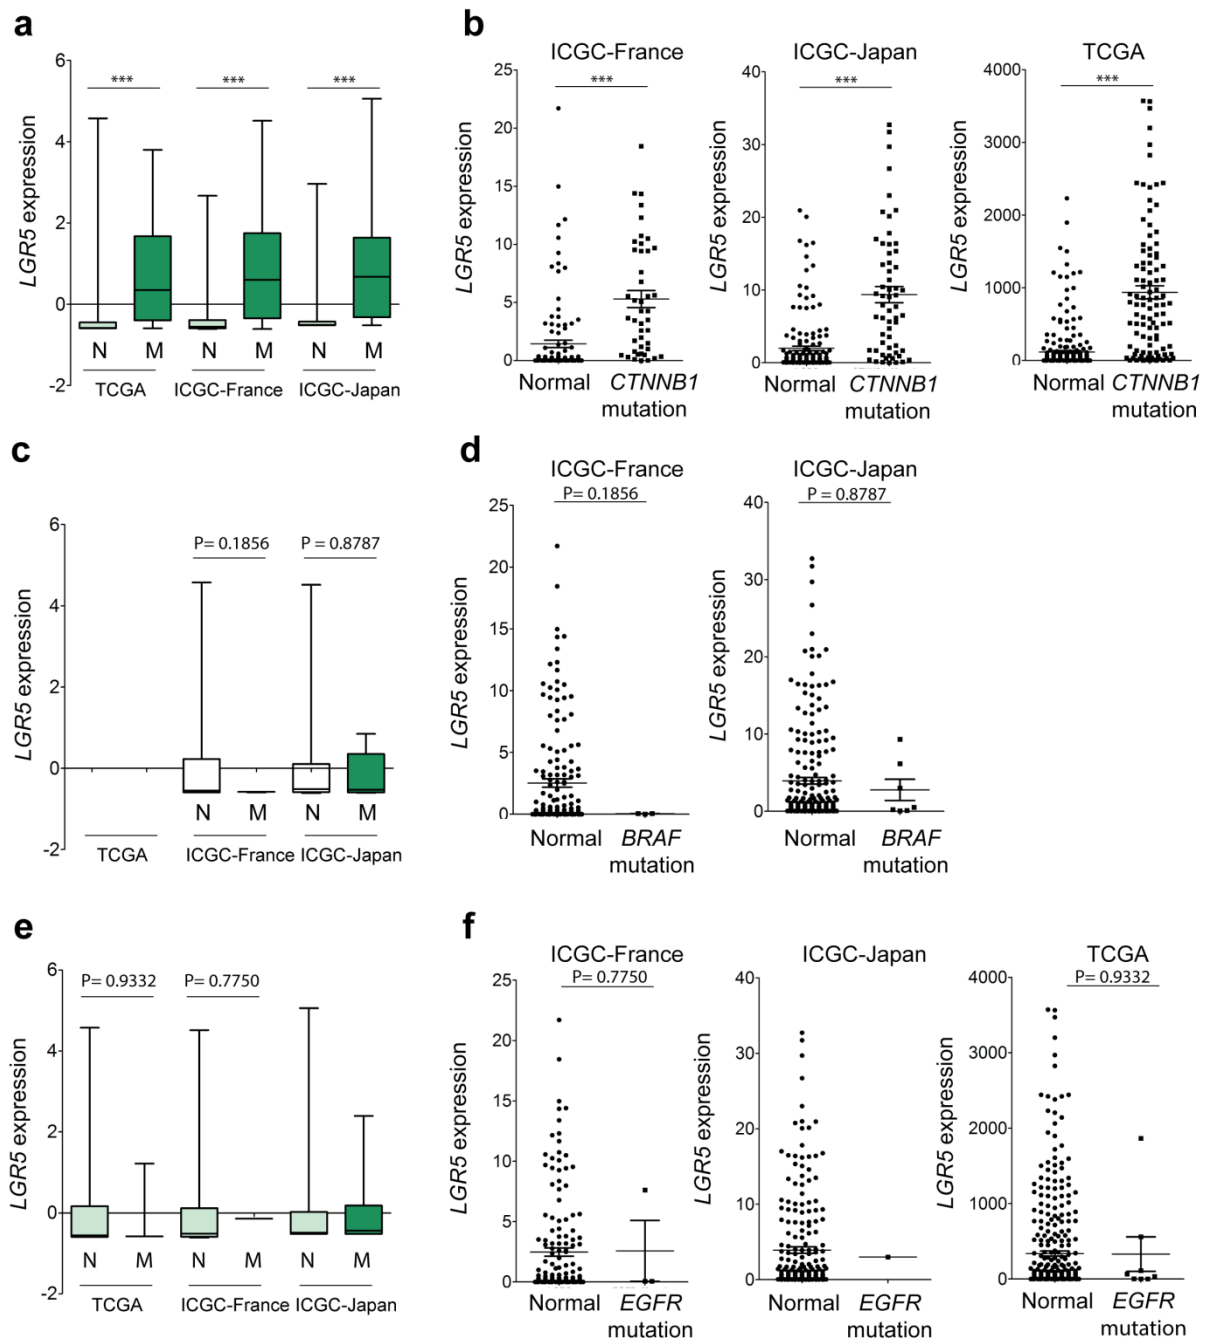

53

54 **Supplementary Figure 4 | The expression level of *LGR5* is upregulated in *Cttnb1* mutated HCC tumors.**

55 **a-b**, Upregulation of *LGR5* expression in *Cttnb1* mutated compared to non-*Cttnb1* mutated patient  
 56 HCC tumors, in ICGC-France, ICGC-Japan and TCGA cohort. **c-d**, No significant difference of *LGR5*  
 57 expression in *Braf* mutated compared to non-*Braf* mutated HCC tumors, in ICGC-France and ICGC-  
 58 Japan cohort. **e-f**, No significant difference of *LGR5* expression in *Egfr* mutated compared to non-*Egfr*  
 59 mutated HCC tumors, in ICGC-France, ICGC-Japan and TCGA cohort. Mean  $\pm$  SEM. Source data are  
 60 provided as a Source Data file.



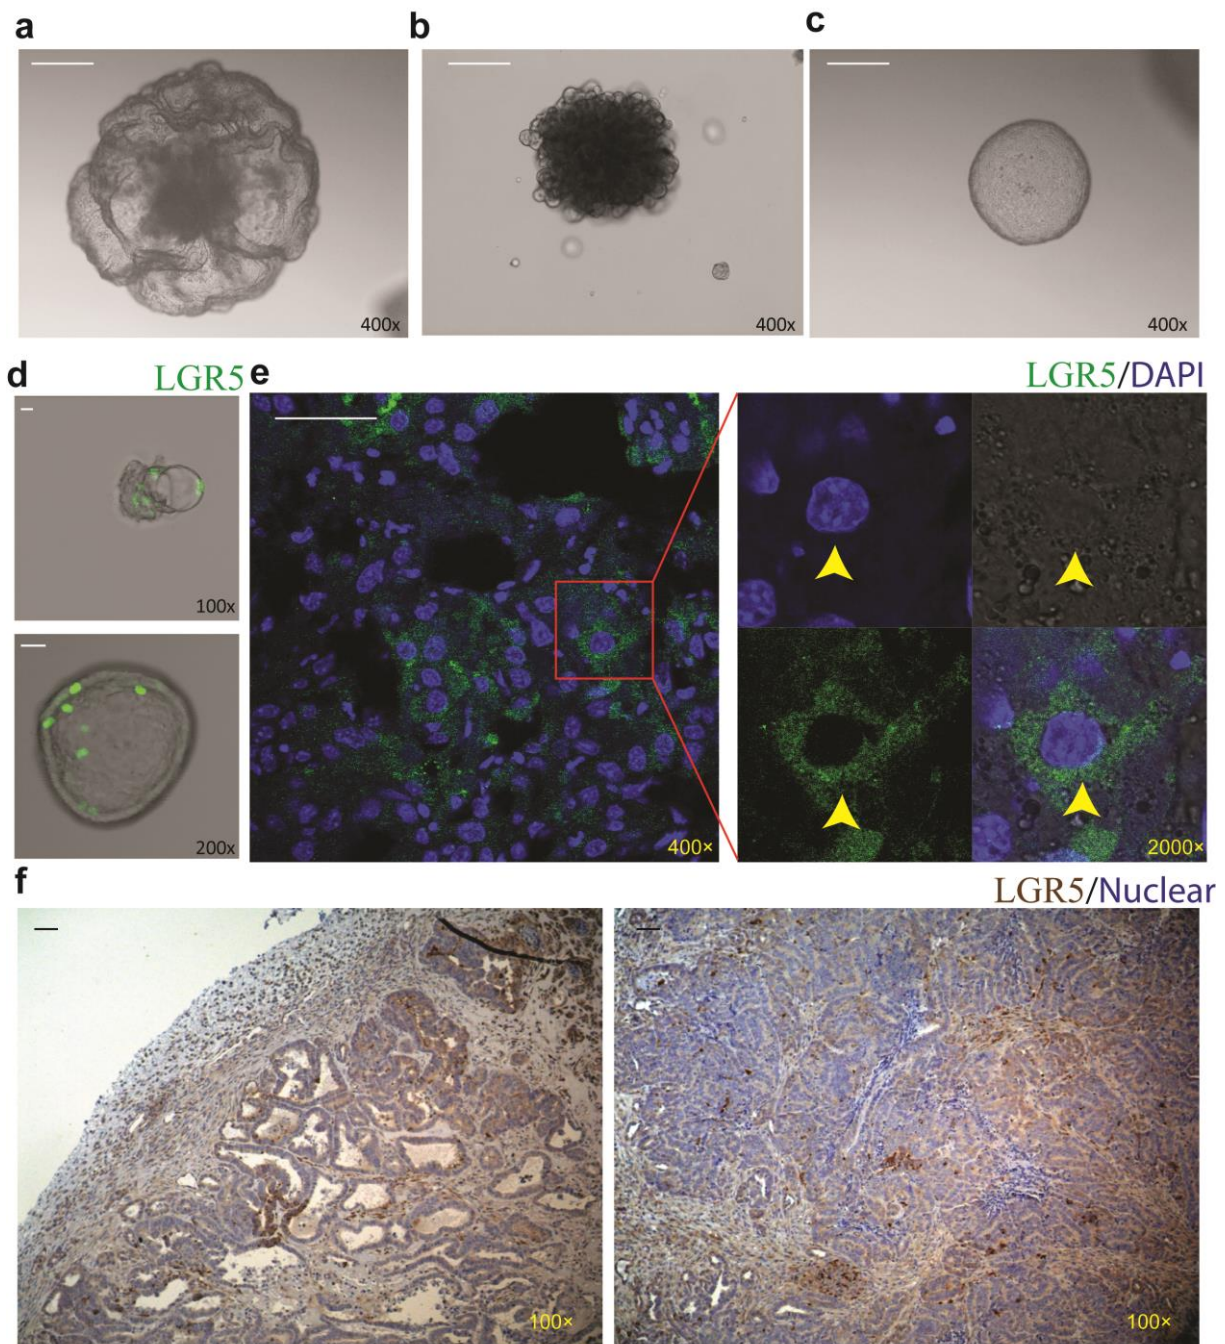

61

62 **Supplementary Figure 5 | Allograft liver tumors maintain an LGR5<sup>+</sup> compartment.** a-c, 3-7 days after  
 63 initiation of allograft tumor-derived cultures, small organoids were observed and subsequently  
 64 passage was performed every 4-7 days, employing splitting ratios ranging from 1:4 to 1:10 as  
 65 appropriate. Representative pictures show the different morphologies of the tumor organoids  
 66 obtained, which include but also flower-like, irregular sheet-like structures (a), and grape-like,  
 67 condensed phenotypes (b), and relative normal hollow sphere-like aspects (c). d, Representative  
 68 confocal pictures showing the maintenance of an LGR5<sup>+</sup> compartment in tumor organoids (LGR5-  
 69 driven GFP: green). e, Representative immunofluorescent pictures showing an LGR5<sup>+</sup> compartment



70 in allograft tumors (*LGR5*-driven GFP: green; DAPI: blue). **f**, Representative immunohistochemistry  
71 pictures showing expression of *LGR5* promotor-driven GFP in allograft tumors (anti-GFP  
72 immunohistochemistry: brown; nuclei: blue). Scale bar = 50 $\mu$ m.

73

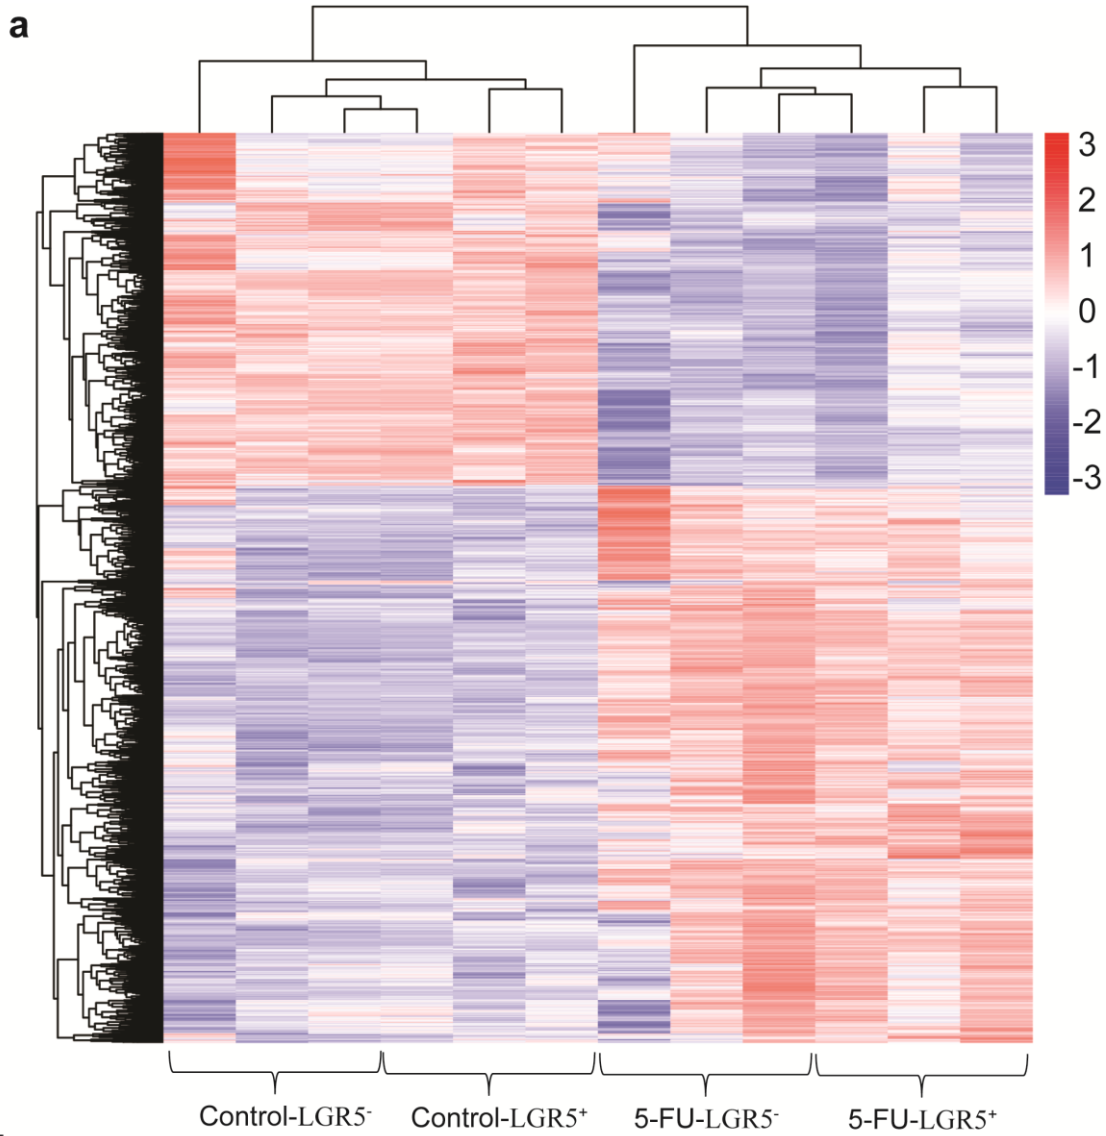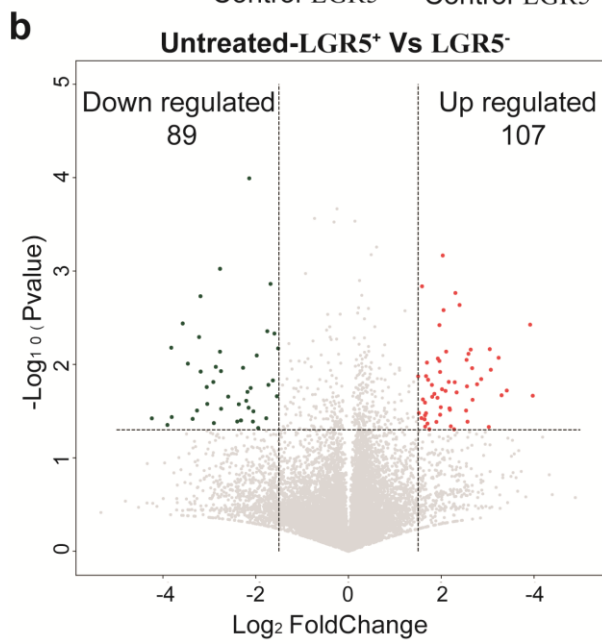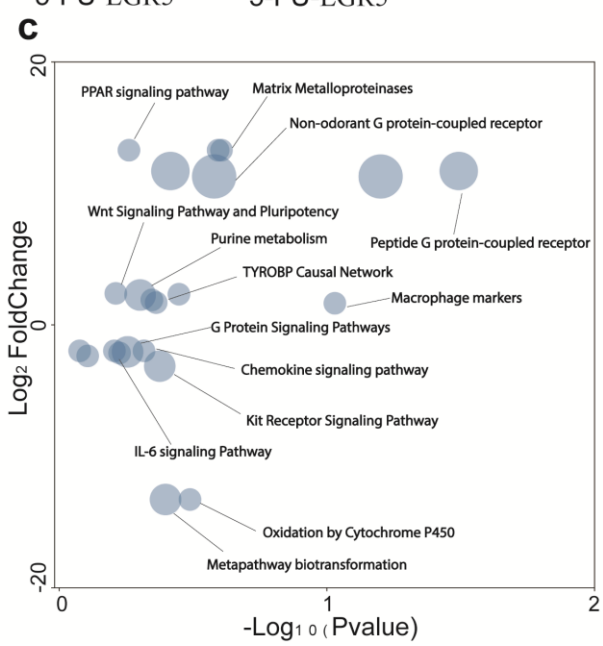

75 **Supplementary Figure 6 | Genome-wide transcriptomic analysis of LGR5<sup>+</sup> and LGR5<sup>-</sup> cells by RNA-**  
76 **Seq. a,** Hierarchical clustering showed a separation of all four different groups (Untreated LGR5<sup>+</sup> cells,  
77 Untreated LGR5<sup>-</sup> cells, 5-FU-treated LGR5<sup>+</sup> cells, 5-FU-treated LGR5<sup>-</sup> cells). **b,** A Volcano plot showing  
78 the most significantly differentially expressed genes between untreated LGR5<sup>+</sup> and LGR5<sup>-</sup> cells. **c,**  
79 GSEA with the library of Wiki2019 was performed to reveal the alteration of signaling pathways  
80 between untreated LGR5<sup>+</sup> and LGR5<sup>-</sup> cells. Source data are provided as a Source Data file.

81

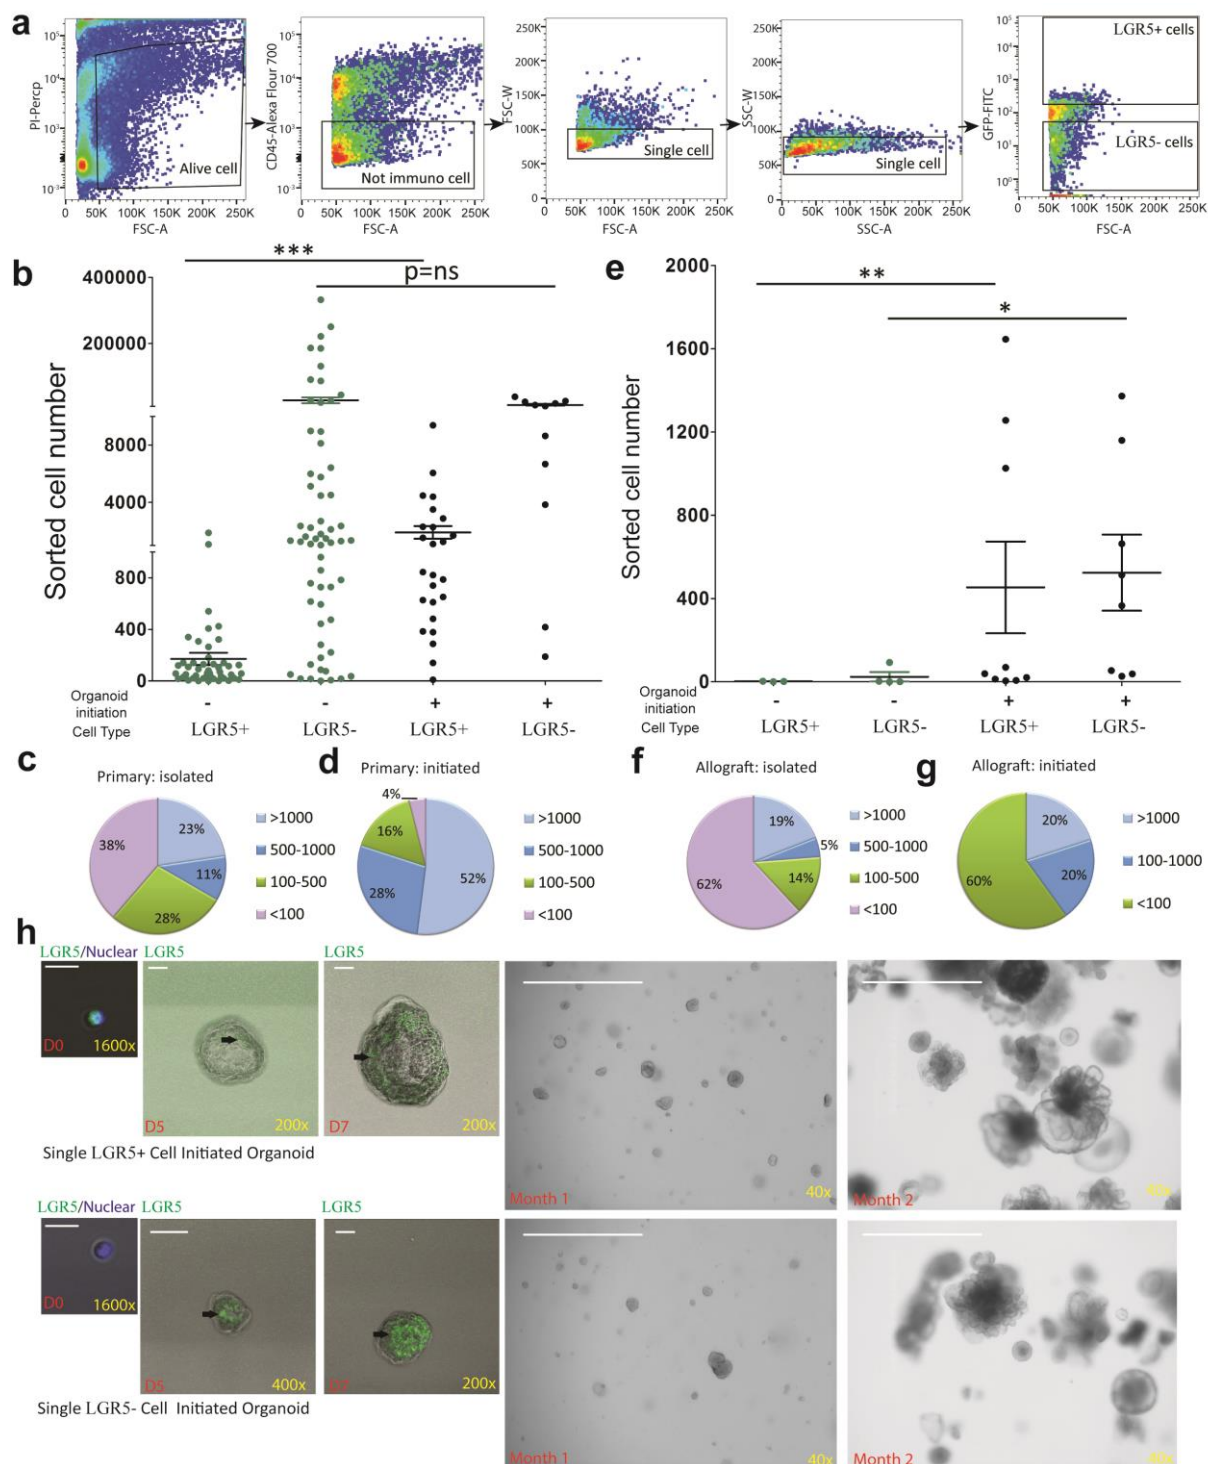

82

83 **Supplementary Figure 7 | LGR5<sup>+</sup> cells have stronger organoid initiation ability.** **a**, The FACS test/sort  
 84 strategy for isolating LGR5-GFP<sup>+</sup> and LGR5-GFP<sup>-</sup> cells obtained from liver/allograft tumors/organoids.  
 85 **b**, The numbers of sorted LGR5-GFP<sup>+</sup> and LGR5-GFP<sup>-</sup> cells yielding successful (black dots) or failure  
 86 of organoid initiation (green dots), employing material obtained from DEN-induced murine livers  
 87 (LGR5<sup>+</sup>-non-initiation vs. LGR5<sup>-</sup>-non-initiation vs. LGR5<sup>+</sup>-initiation vs. LGR5<sup>-</sup>-initiation: 171.4 ± 47.1,  
 88 n = 46 vs. 28350 ± 8914, n = 60 vs. 1906 ± 441.6, n = 25 vs. 13860 ± 3654, n = 11, Mean ± SEM). **c**, The

89 distribution showing the percentage of the number of LGR5<sup>+</sup> cells which were isolated from primary  
90 liver tumors. d, The cell number distribution for the sorted LGR5<sup>+</sup> cells which can initiate organoid,  
91 from primary tumors. e, The exact sorted numbers for LGR5<sup>+</sup> cells and LGR5<sup>-</sup> cells , for organoid  
92 initiated (black dots) and non-organoid initiated (green dots), from allograft tumors (LGR5<sup>+</sup>-non-  
93 initiated vs. LGR5<sup>-</sup>-non-initiated vs. LGR5<sup>+</sup>-initiated vs. LGR5<sup>-</sup>-initiated:  $2.0 \pm 0.6$ , n = 3 vs.  $24.3 \pm 22.9$ ,  
94 n = 4 vs.  $453.7 \pm 220.3$ , n = 9 vs.  $524.3 \pm 182.9$ , n = 8). f, Frequency distribution of the relative number  
95 of LGR5<sup>+</sup> cells obtained from allograft liver tumors. g, Frequency distribution of the number of LGR5<sup>+</sup>  
96 cells that display successful organoid initiation from material obtained from allograft tumors. h,  
97 Representative pictures tracing organoids initiation and growth from LGR5<sup>+</sup> or LGR5<sup>-</sup> cells. Black  
98 arrow: LGR5 expressing cells. Day0/5/7: Scale bar = 50 $\mu$ m; Month1/2: Scale bar = 1000 $\mu$ m. Source  
99 data are provided as a Source Data file.

100

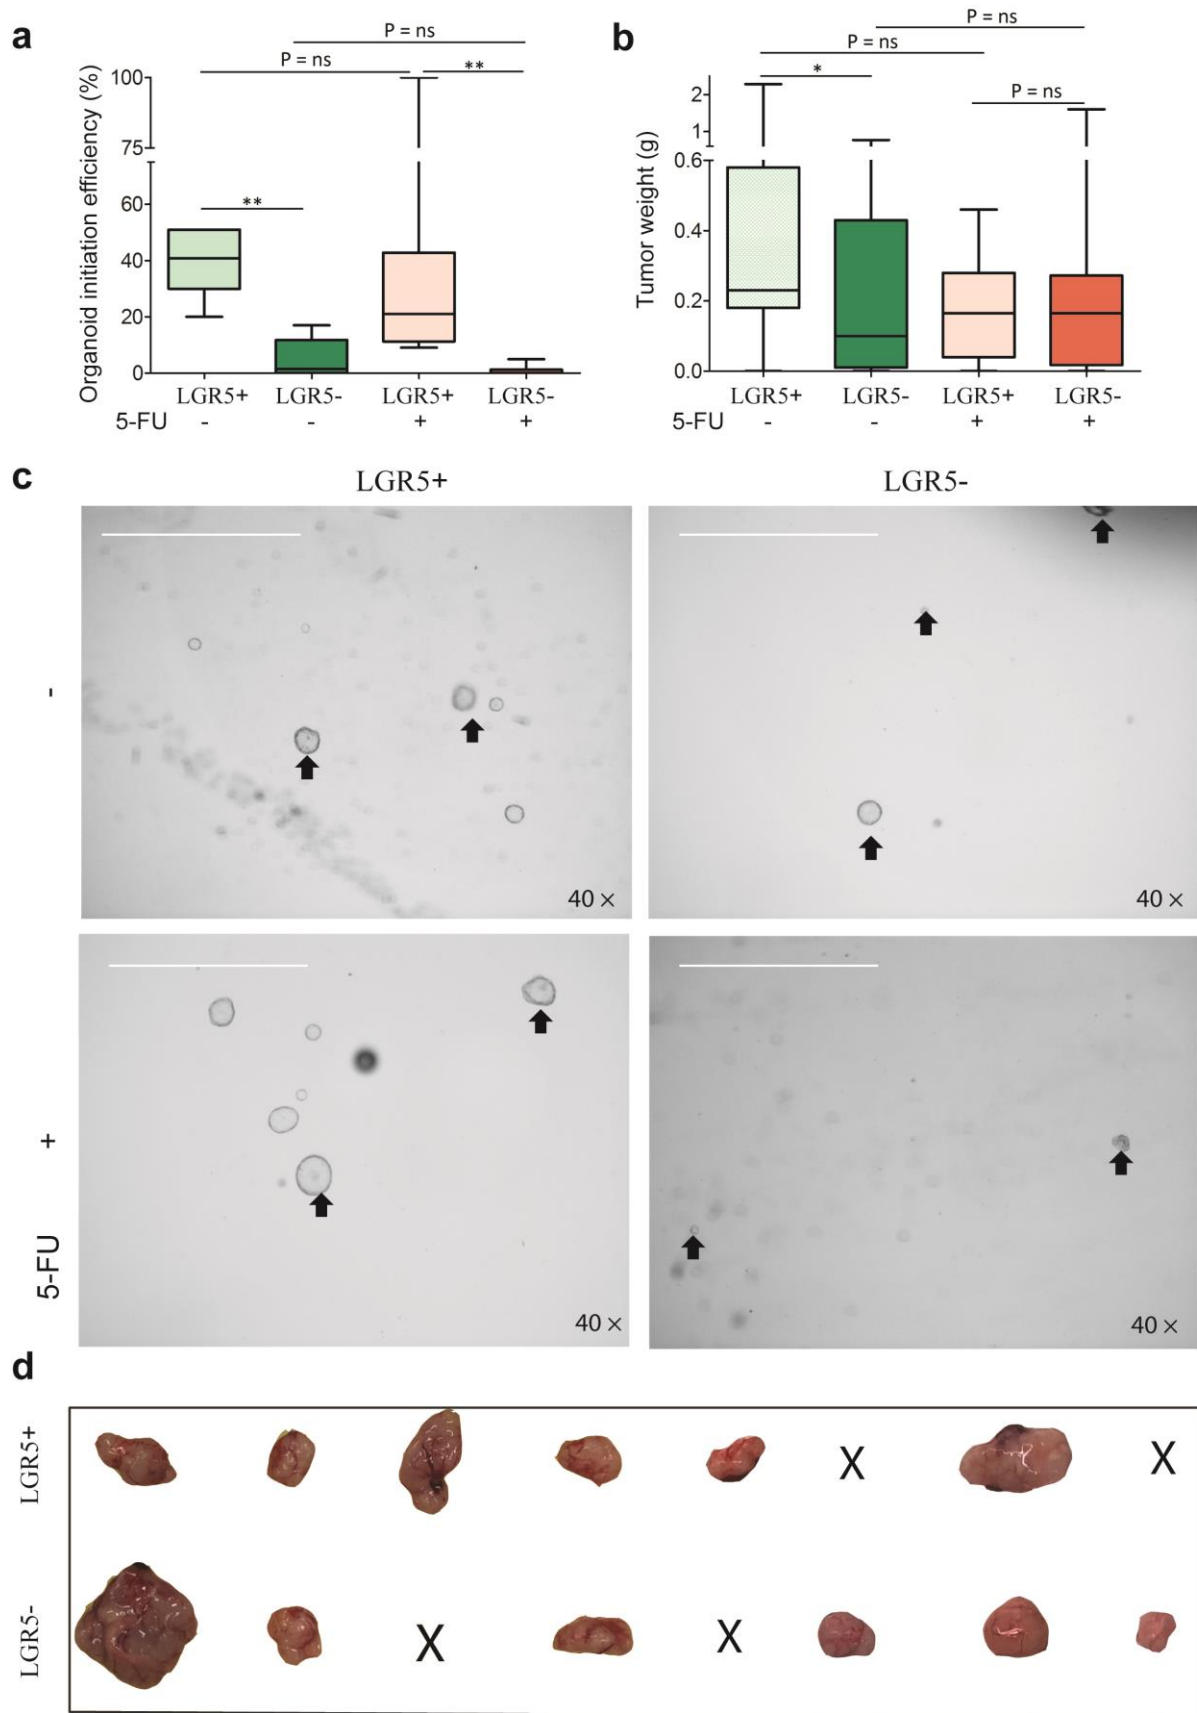

101

102



103 **Supplementary Figure 8 | LGR5<sup>+</sup> cells from 5-FU treated tumors can initiate organoid and tumor. a,**  
104 The organoid initiation ability of untreated LGR5<sup>+</sup> cells ( $39.5 \pm 4.8 \%$ ,  $n = 6$ , Mean  $\pm$  SEM), untreated  
105 LGR5<sup>-</sup> cells ( $5.0 \pm 2.9 \%$ ,  $n = 6$ ), 5-FU-treated LGR5<sup>+</sup> cells ( $31.2 \pm 14.0 \%$ ,  $n = 6$ ) and 5-FU-treated LGR5<sup>-</sup>  
106 cells ( $0.8 \pm 0.8 \%$ ,  $n = 6$ ). **b,** The tumor initiation ability of untreated LGR5<sup>+</sup> cells ( $0.50 \pm 0.15$  g,  $n = 15$ ),  
107 untreated LGR5<sup>-</sup> cells ( $0.21 \pm 0.06$  g,  $n = 15$ ), 5-FU-treated LGR5<sup>+</sup> cells ( $0.18 \pm 0.05$  g,  $n = 8$ ) and 5-FU-  
108 treated LGR5<sup>-</sup> cells ( $0.31 \pm 0.19$  g,  $n = 8$ ). **c,** Representative picture showing the organoid initiation  
109 ability of above four groups. Black arrow: initiated organoids. Scale bar = 1000 $\mu$ m. **d,** Pictures showing  
110 5-FU-treated LGR5<sup>+</sup> cells and 5-FU-treated LGR5<sup>-</sup> cells initiated tumors. Source data are provided as  
111 a Source Data file.

112

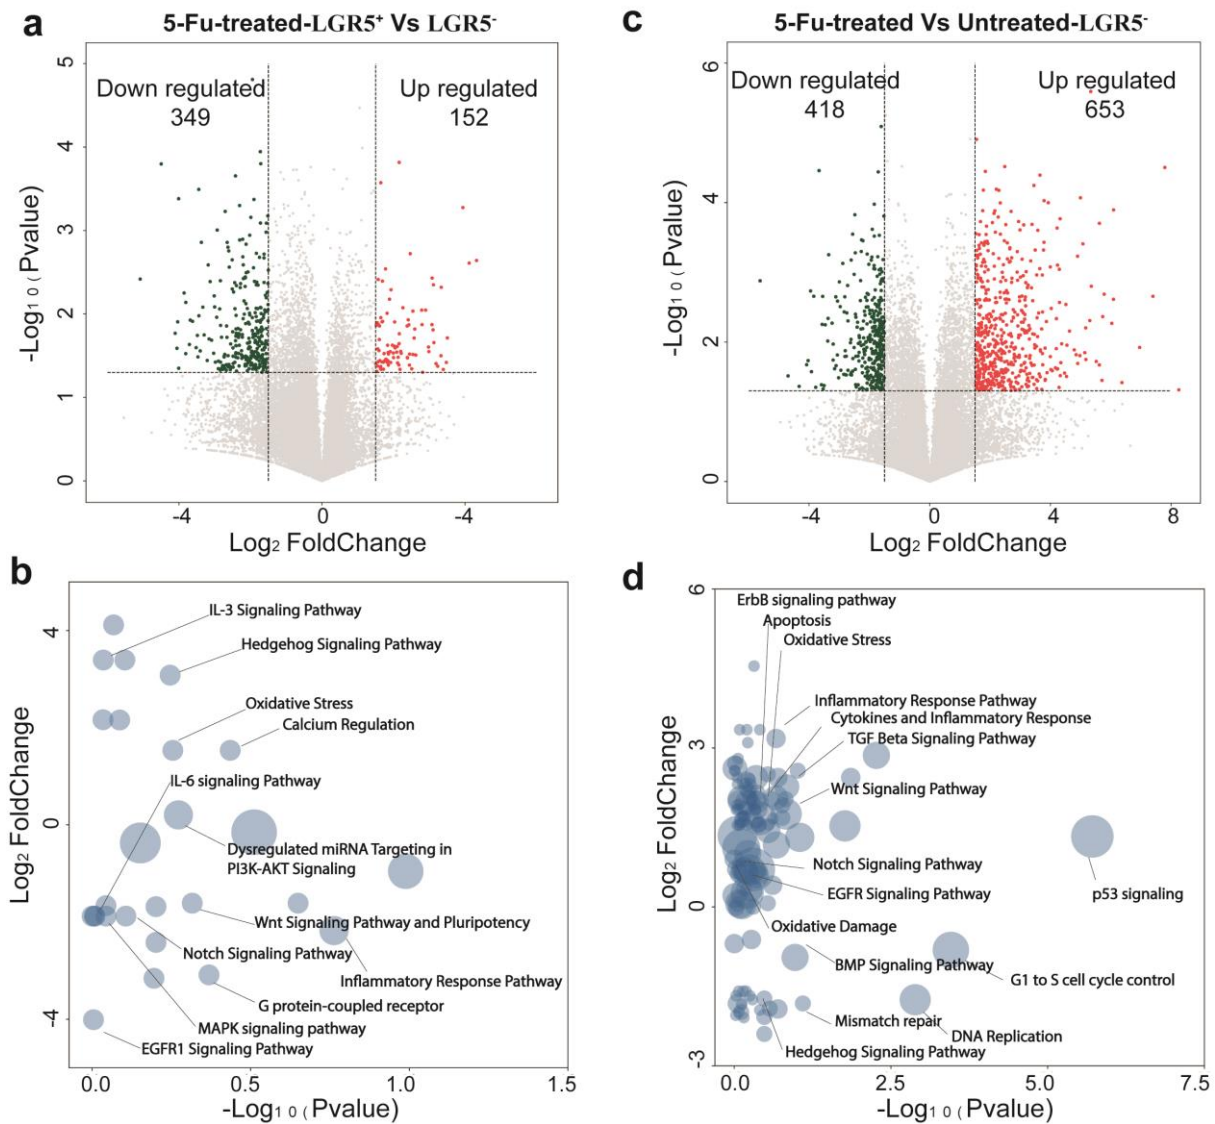

113

114 **Supplementary Figure 9 | Genome-wide transcriptomic analysis of 5-FU treatment on LGR5<sup>+/-</sup> cells.**

115 **a**, A Volcano plot showing the most significantly differentially expressed genes between 5-FU treated  
 116 LGR5<sup>+</sup> cell/LGR5<sup>-</sup> cells. **b**, Gene enrichment analysis (Wiki2019) of the differentially expressed genes  
 117 between 5-FU treated LGR5<sup>+</sup> cell/LGR5<sup>-</sup> cells. **c**, A Volcano plot showing the most significantly  
 118 differentially expressed genes between 5-FU treated/untreated LGR5<sup>-</sup> cells. **d**, Gene enrichment  
 119 analysis (Wiki2019) of the differentially expressed genes between 5-FU treated/untreated LGR5<sup>-</sup> cells.  
 120 Source data are provided as a Source Data file.

121

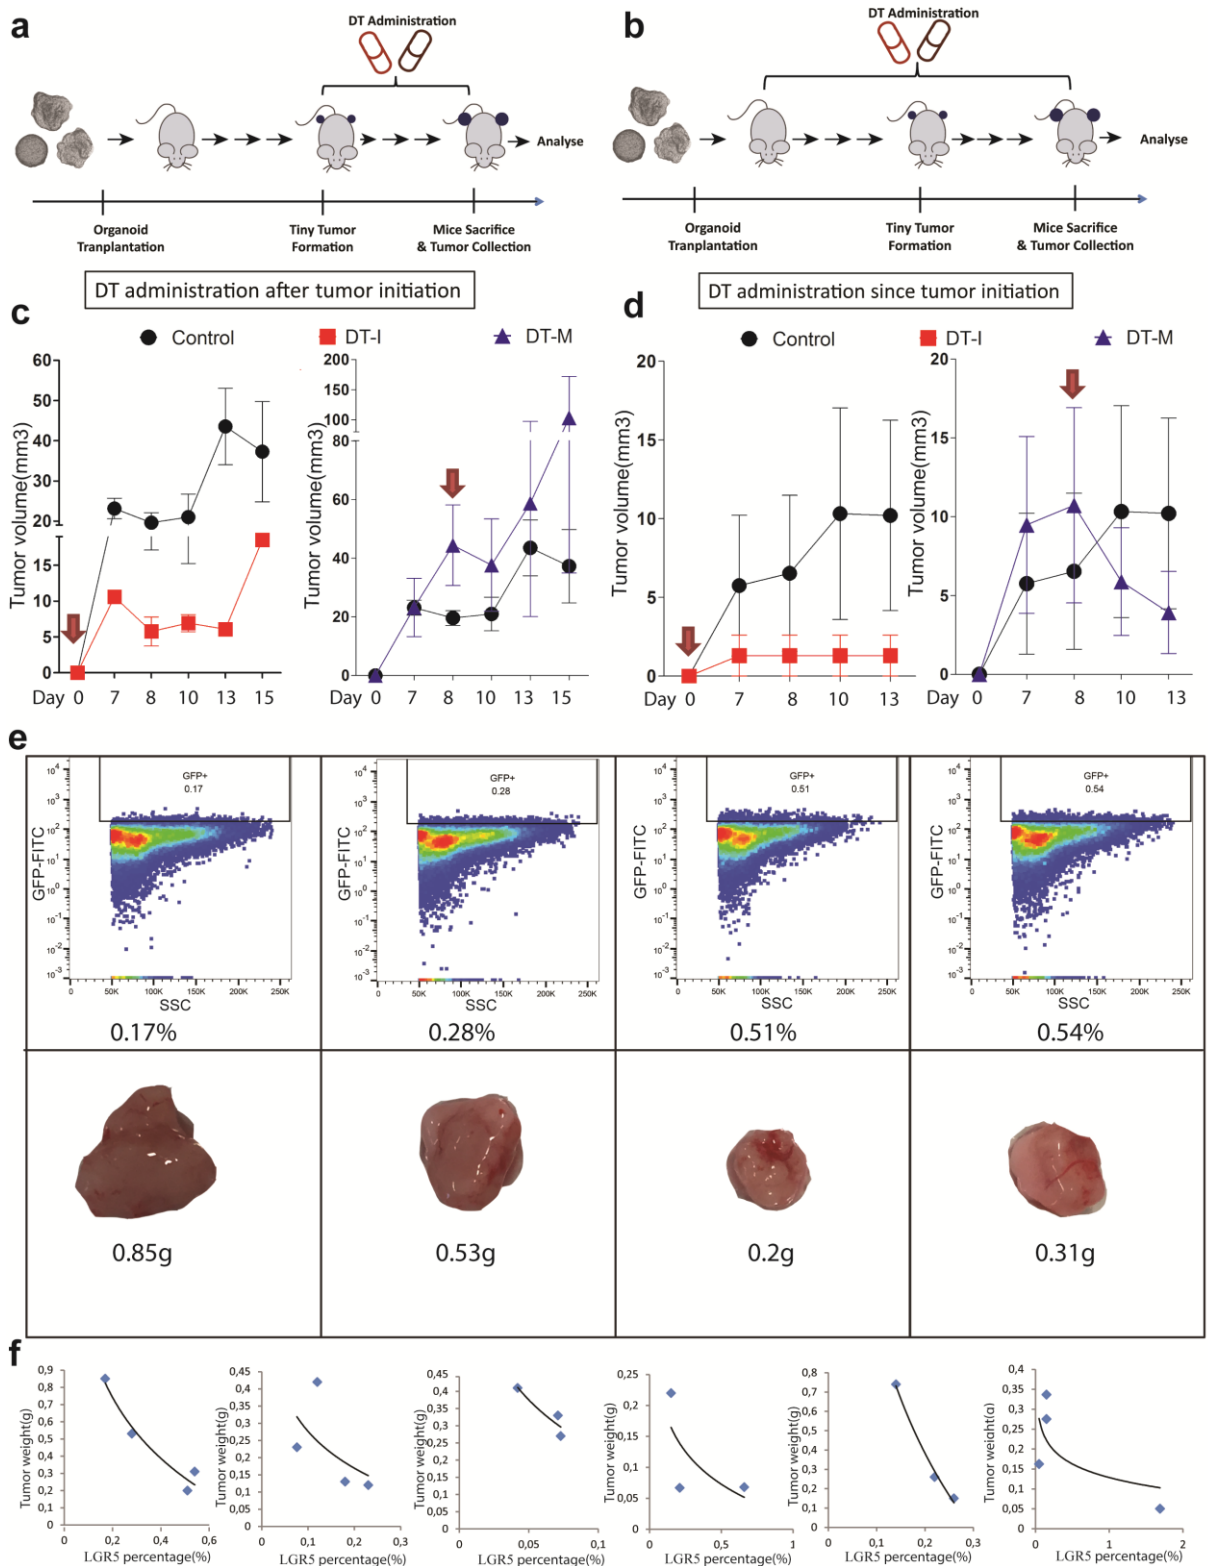

122

123 **Supplementary Figure 10 | Targeting LGR5 impedes the tumor growth.** a-b, Outline of the  
 124 experimental strategies used to test the effect of DT administration during tumor growth (a) and at  
 125 tumor initiation (b). c-d, Growth curves showing the effects of DT administration during the entire  
 126 experimental period (Left, DT-I) and following DT intervention during tumor growth (Right, DT-M) for  
 127 organoid strain 1 (c) and strain 2 (d). Mean ± SEM. Red arrow: onset of DT administration (n = 4 for

128 each time point). **e**, Representative FACS pictures (upper channel, with LGR5-GFP<sup>+</sup> expression) and  
129 tumor pictures (lower channel, with tumor weights) showing that the same tumor strains, collected  
130 from a single mouse, shows variable LGR5 expression. **f**, tumors collected from six individual mice  
131 (transplanted with same strain and same amount of organoid; collected on the same day, non-treated  
132 tumors) showing that smaller tumors have relatively higher LGR5 expression. Source data are  
133 provided as a Source Data file.

134

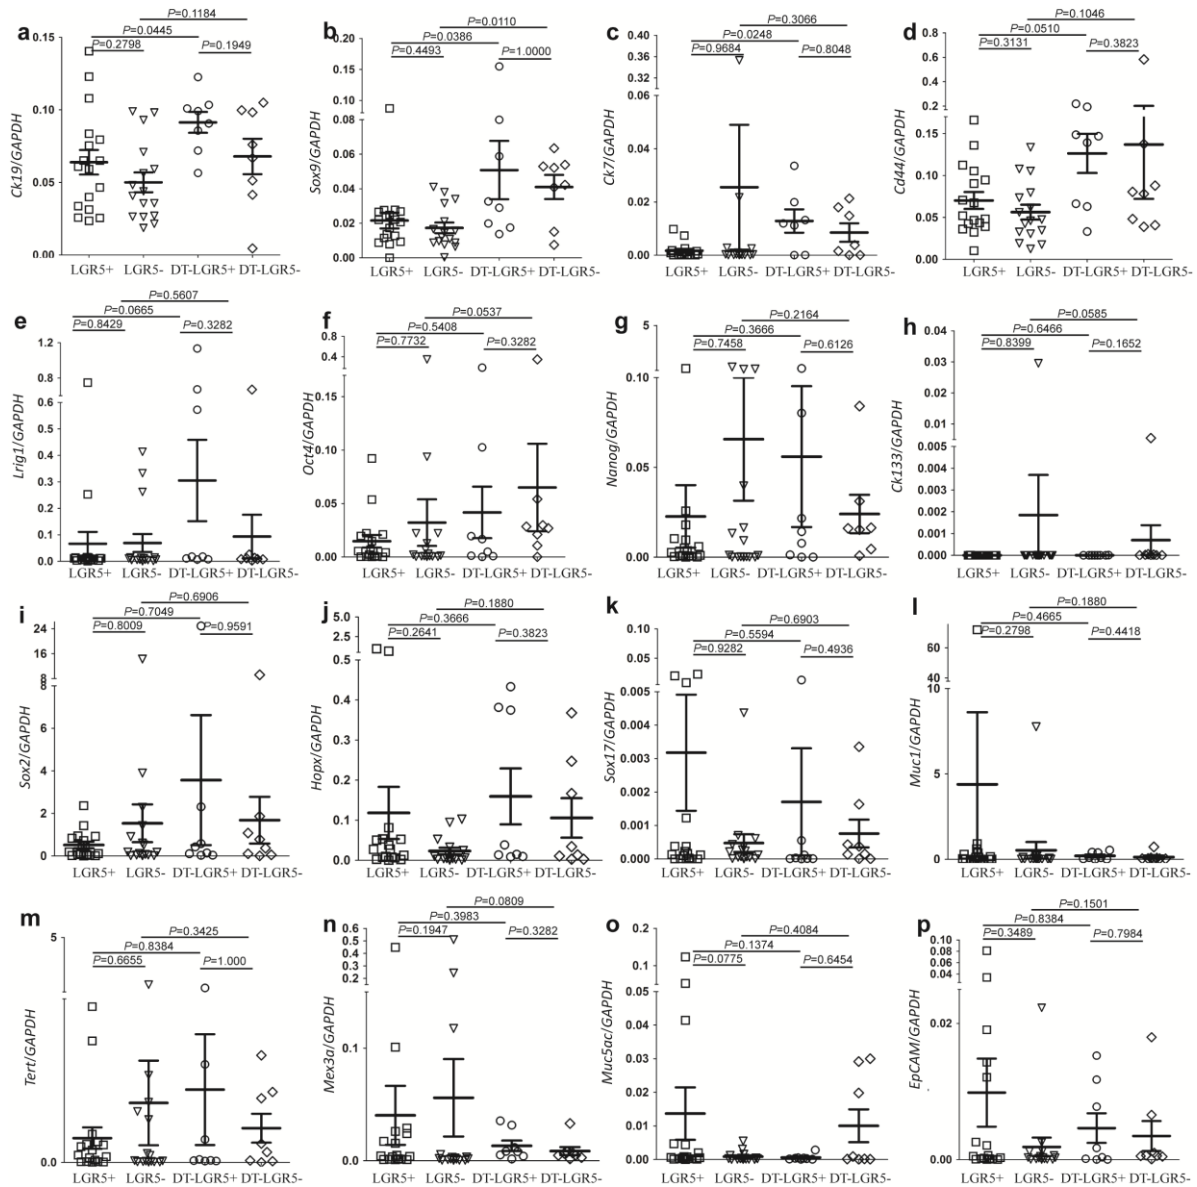

135

136

**Supplementary Figure 11 | The expression profile of untreated/DT-treated LGR5<sup>+</sup> and LGR5<sup>-</sup> cells.**

137

**a-p**, The expression of stem cell/tumor stem cell markers in LGR5<sup>+</sup>/LGR5<sup>-</sup> and DT treated tumor isolated LGR5<sup>+</sup>/LGR5<sup>-</sup> cells was analyzed using qRT-PCR and related to a reference gene. Mean ± SEM.

138

Source data are provided as a Source Data file.

139

140

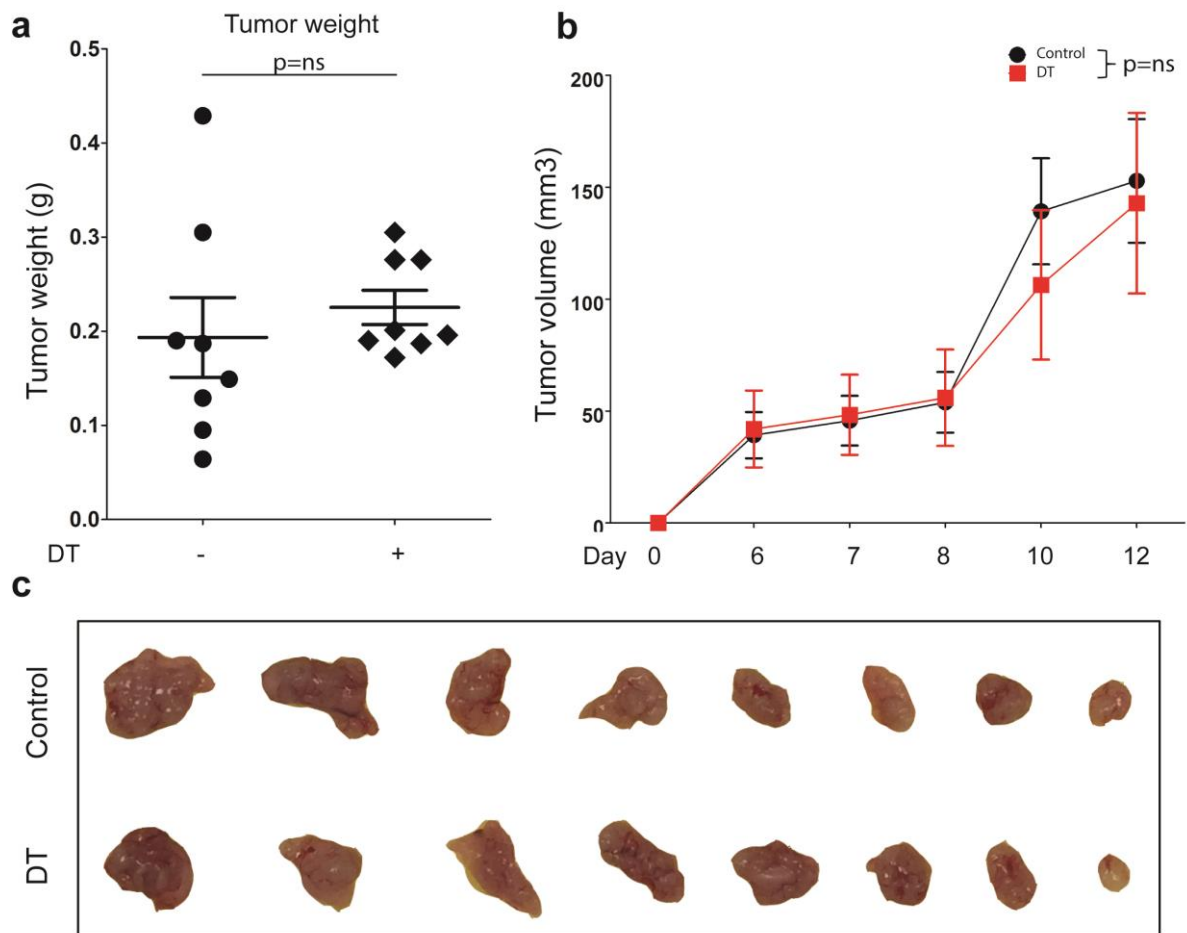

141

142 **Supplementary Figure 12 | Wide type tumor organoids do not respond to DT administration.** **a**, The  
 143 weight of tumors initiated by wild type organoids from control, the DT-treated group following sacrifice  
 144 of the animals involved (Control vs. DT:  $0.19 \pm 0.042$  g vs.  $0.23 \pm 0.018$  g,  $n = 8$ ,  $P = ns$ , Mean  $\pm$  SEM). **b**,  
 145 Representative growth curve showing tumor volume in the control group and the DT-treated group ( $n$   
 146 = 4). **c**, Representative pictures showing the tumors from the control group and DT administrated  
 147 group. Source data are provided as a Source Data file.

148



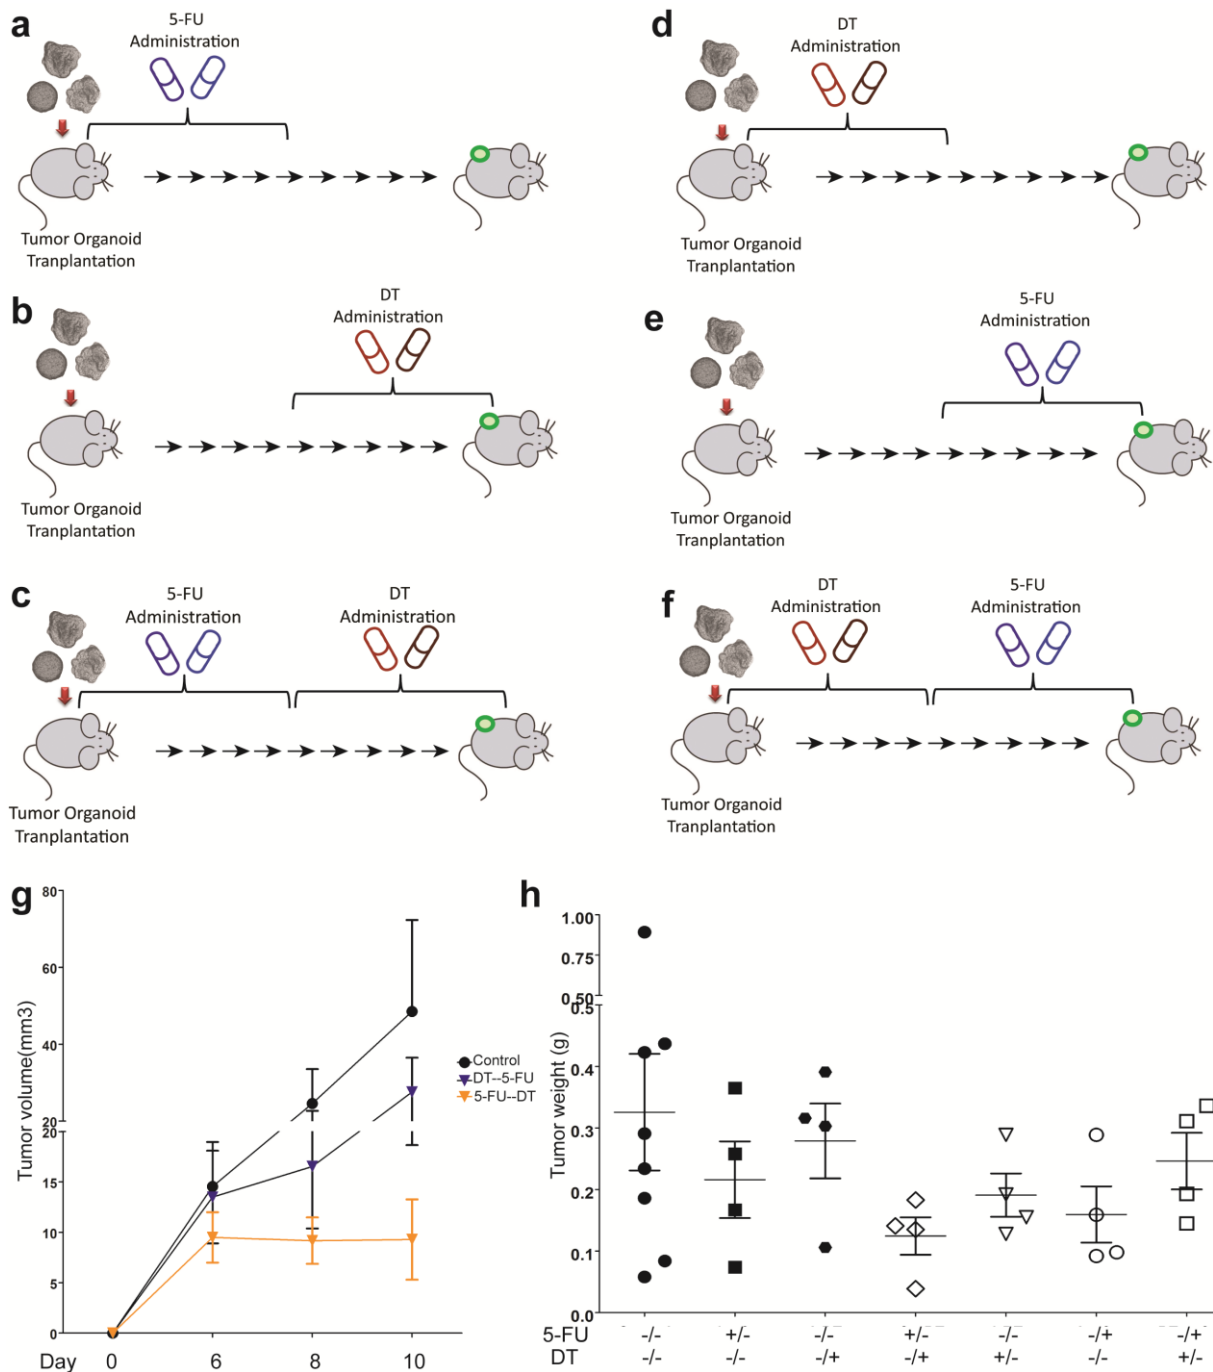

149

150 **Supplementary Figure 13 | Effects of combining DT treatment with conventional anti-cancer therapy.**

151 **a**, 5-FU control: 5-FU was administrated during the first half of the experiment period and tumor  
 152 volume was assessed continuously. **b**, DT control: animals were treated with DT during the second half  
 153 of the experiment period and tumor volume was assessed continuously. **c**, Combination strategy 1: 5-  
 154 FU was administrated during the first half and DT was treated during the second half of the experiment  
 155 period. Tumor volume was assessed continuously. (**a** and **b** are the relevant control groups for **c**). **d**,  
 156 DT control: DT was administrated during the first half of the experiment period and tumor volume was  
 157 assessed continuously. **e**, 5-FU control: 5-FU was administrated during the second half of the

158 experiment period the and tumor volume was assessed continuously. **f**, Combination strategy 2: First  
159 DT was applied (first half of the experiment) followed by 5-FU treatment (second half of the  
160 experiment) (**d** and **e** are the relevant control groups for **f**). **g**, Representative growth curve showing  
161 tumor volumes of the control, Combination strategy 1 (5-FU--DT) and Combination strategy 2 (DT--5-  
162 FU) group ( $n = 4$ ). **h**, Weight of tumors from the different groups described above at the end of the  
163 experiment. +/-: Treatment was administrated for the first half of the experiment; -/+: Treatment was  
164 administrated for the second half of the experiment; -/-: No treatment. Mean  $\pm$  SEM. Source data are  
165 provided as a Source Data file.

166

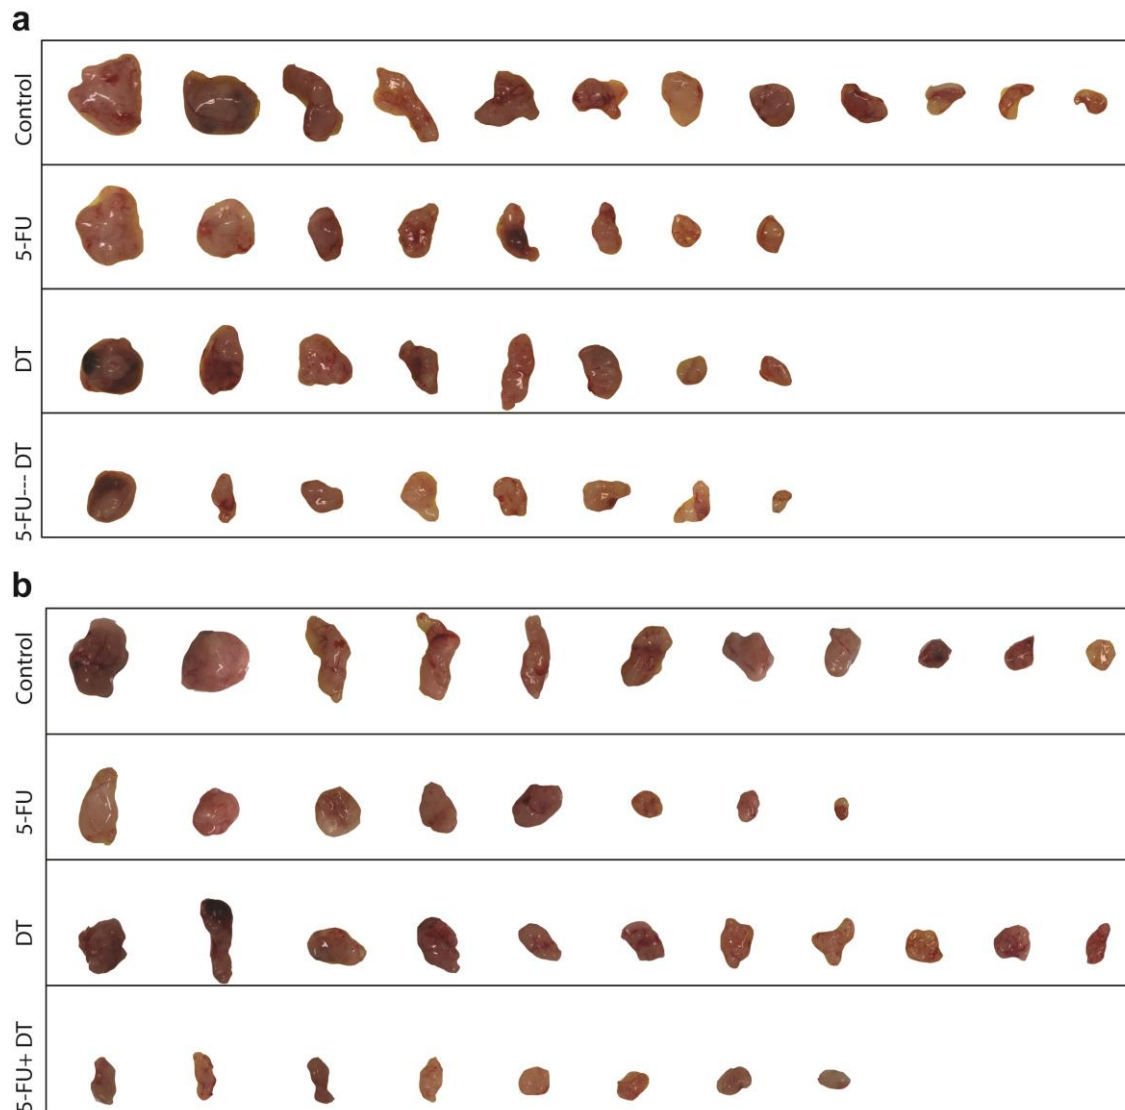

167

168 **Supplementary Figure 14 | Combination of LGR5 lineage ablation with conventional therapy. a-b,**  
 169 Pictures showing the tumors from the different groups.

170

| <b>Allograft Tumor</b>      |                                 |                        |                             |                                  |                             |                                  |
|-----------------------------|---------------------------------|------------------------|-----------------------------|----------------------------------|-----------------------------|----------------------------------|
| <b>Initiated Tumor Code</b> | <b>Isolated Cell Population</b> | <b>Original Strain</b> | <b>Injected Cell Number</b> | <b>Initiated Tumor Weight(g)</b> | <b>Tumor Formation Time</b> | <b>Immunodeficient mice type</b> |
| <b>1</b>                    | <b>LGR5+</b>                    | <b>SAL1</b>            | <b>72</b>                   | <b>0.58</b>                      | <b>23</b>                   | <b>Nude mice</b>                 |
|                             | <b>LGR5-</b>                    |                        | <b>72</b>                   | <b>0.27</b>                      | <b>23</b>                   | <b>Nude mice</b>                 |
| <b>2</b>                    | <b>LGR5+</b>                    | <b>SAL1</b>            | <b>57</b>                   | <b>0.44</b>                      | <b>23</b>                   | <b>Nude mice</b>                 |
|                             | <b>LGR5-</b>                    |                        | <b>57</b>                   | <b>0.01</b>                      | <b>23</b>                   | <b>Nude mice</b>                 |
| <b>3</b>                    | <b>LGR5+</b>                    | <b>SAL1</b>            | <b>90</b>                   | <b>0.14</b>                      | <b>23</b>                   | <b>Nude mice</b>                 |
|                             | <b>LGR5-</b>                    |                        | <b>90</b>                   | <b>0.11</b>                      | <b>23</b>                   | <b>Nude mice</b>                 |
| <b>4</b>                    | <b>LGR5+</b>                    | <b>SAL1</b>            | <b>167</b>                  | <b>0.22</b>                      | <b>23</b>                   | <b>Nude mice</b>                 |
|                             | <b>LGR5-</b>                    |                        | <b>167</b>                  | <b>0.08</b>                      | <b>23</b>                   | <b>Nude mice</b>                 |
| <b>5</b>                    | <b>LGR5+</b>                    | <b>AL43</b>            | <b>66</b>                   | <b>2.28</b>                      | <b>38</b>                   | <b>Nude mice</b>                 |
|                             | <b>LGR5-</b>                    |                        | <b>66</b>                   | <b>0.45</b>                      | <b>38</b>                   | <b>Nude mice</b>                 |
| <b>6</b>                    | <b>LGR5+</b>                    | <b>AL43</b>            | <b>53</b>                   | <b>1.11</b>                      | <b>38</b>                   | <b>NSG</b>                       |
|                             | <b>LGR5-</b>                    |                        | <b>53</b>                   | <b>0.43</b>                      | <b>38</b>                   | <b>NSG</b>                       |
| <b>7</b>                    | <b>LGR5+</b>                    | <b>AL43</b>            | <b>57</b>                   | <b>0.51</b>                      | <b>38</b>                   | <b>NSG</b>                       |
|                             | <b>LGR5-</b>                    |                        | <b>57</b>                   | <b>0.77</b>                      | <b>38</b>                   | <b>NSG</b>                       |
| <b>8</b>                    | <b>LGR5+</b>                    | <b>SAL2</b>            | <b>237</b>                  | <b>0.8</b>                       | <b>26</b>                   | <b>Nude mice</b>                 |
|                             | <b>LGR5-</b>                    |                        | <b>237</b>                  | <b>0.05</b>                      | <b>26</b>                   | <b>Nude mice</b>                 |
| <b>9</b>                    | <b>LGR5+</b>                    | <b>SAL2</b>            | <b>699</b>                  | <b>0.23</b>                      | <b>26</b>                   | <b>Nude mice</b>                 |
|                             | <b>LGR5-</b>                    |                        | <b>699</b>                  | <b>0.1</b>                       | <b>26</b>                   | <b>Nude mice</b>                 |
| <b>10</b>                   | <b>LGR5+</b>                    | <b>SAL1</b>            | <b>182</b>                  | <b>0.53</b>                      | <b>26</b>                   | <b>Nude mice</b>                 |
|                             | <b>LGR5-</b>                    |                        | <b>182</b>                  | <b>0.09</b>                      | <b>26</b>                   | <b>Nude mice</b>                 |
| <b>11</b>                   | <b>LGR5+</b>                    | <b>SAL1</b>            | <b>127</b>                  | <b>0.18</b>                      | <b>26</b>                   | <b>Nude mice</b>                 |
|                             | <b>LGR5-</b>                    |                        | <b>127</b>                  | <b>0.61</b>                      | <b>26</b>                   | <b>Nude mice</b>                 |

172

173

| <b>Table. Patient characteristics</b>    |                            |
|------------------------------------------|----------------------------|
| <b>Characteristic</b>                    | <b>HCC patients (n=74)</b> |
| <b>Age at surgery (years)</b>            |                            |
| Mean $\pm$ SD                            | 60 $\pm$ 15,9              |
| Median (range)                           | 63 (11-82)                 |
| <b>Sex – no. (%)</b>                     |                            |
| Male                                     | 45 (60,8)                  |
| Female                                   | 29 (39,2)                  |
| <b>Race – no. (%)</b>                    |                            |
| White                                    | 61 (82,4)                  |
| African                                  | 6 (8,1)                    |
| Asian                                    | 6 (8,1)                    |
| Not reported                             | 1 (1,4)                    |
| <b>Etiology – no. (%)</b>                |                            |
| No known liver disease                   | 21 (28,4)                  |
| Alcohol                                  | 16 (21,6)                  |
| Hepatitis B                              | 9 (12,2)                   |
| NASH                                     | 8 (10,8)                   |
| Hepatitis C + Alcohol                    | 6 (8,1)                    |
| Hepatitis B + Alc/HepC/NASH              | 5 (6,8)                    |
| Hepatitis C                              | 5 (6,8)                    |
| Fibrolamellar HCC                        | 3 (4,1)                    |
| Hemochromatosis + NASH                   | 1 (1,4)                    |
| <b>Hepatitis status – no. (%)</b>        |                            |
| Hepatitis B or C positive                | 25 (33,8)                  |
| Chronic Hepatitis B                      | 14 (18,9)                  |
| Chronic Hepatitis C                      | 12 (16,2)                  |
| <b>Cirrhosis – no. (%)</b>               |                            |
| Yes                                      | 21 (28,4)                  |
| No                                       | 53 (71,6)                  |
| <b>Tumor differentiation – no. (%)</b>   |                            |
| Good                                     | 8 (10,8)                   |
| Moderate                                 | 40 (54,1)                  |
| Poor                                     | 14 (18,9)                  |
| Unknown                                  | 12 (16,2)                  |
| <b>Vascular invasion – no. (%)</b>       |                            |
| Yes                                      | 29 (39,2)                  |
| No                                       | 38 (51,4)                  |
| Unknown                                  | 7 (9,5)                    |
| <b>Number of lesions – no. (%)</b>       |                            |
| 1                                        | 40 (54,1)                  |
| >1                                       | 34 (45,9)                  |
| <b>Size of largest lesion (cm)</b>       |                            |
| Mean $\pm$ SD                            | 7,7 $\pm$ 5,6              |
| Median (range)                           | 6,1 (1-24)                 |
| <b>AFP level before resection (ug/l)</b> |                            |
| Mean $\pm$ SD                            | 6661,1 $\pm$ 407289,4      |
| Median (range)                           | 8 (1-3118700)              |

176 **Supplementary Table 3 | Antibody**

| <b>Antibody</b>                                                                      | <b>Antibody clone/<br/>reference</b> | <b>Raised</b> | <b>Origin</b>                   |
|--------------------------------------------------------------------------------------|--------------------------------------|---------------|---------------------------------|
| CD45                                                                                 | 56-0451-82                           | Mouse         | eBioscience                     |
| AFP                                                                                  | SAB3500533-<br>100UG                 | Goat          | Sigma                           |
| HNF4a                                                                                | ab41898                              | Mouse         | Abcam                           |
| EpCAM                                                                                | ab71916                              | Rabbit        | Abcam                           |
| Cytokeratin 19                                                                       | ab52625                              | Rabbit        | Abcam                           |
| GFP                                                                                  | A-11122                              | Rabbit        | Invitrogen/Life<br>Technologies |
| Alexa Fluor® 488<br>AffiniPure Donkey Anti-<br>Goat IgG (H+L)                        | 705-545-147                          | Donkey        | Bio-Connect                     |
| Donkey anti-Rabbit IgG<br>(H+L) Secondary<br>Antibody, Alexa Fluor®<br>594 conjugate | R37119                               | Donkey        | Thermo fisher                   |
| Donkey anti-mouse IgG<br>(H+L) Secondary<br>Antibody, Alexa Fluor®<br>594 conjugate  | R37115                               | Donkey        | Thermo fisher                   |

177

178



| <b>Gene name</b>                                               | <b>Gene Symbo</b>    | <b>Sequence</b> |                              |
|----------------------------------------------------------------|----------------------|-----------------|------------------------------|
| Leucine-rich repeat-containing G-protein coupled receptor 5    | Mouse- <i>Lgr5</i>   | Fw              | CTG ACT TTG AAT GGT GCC TCG  |
|                                                                |                      | Re              | ATG TCC ACT ACC GCG ATT AC   |
| Cytokeratin-19                                                 | Mouse- <i>Krt19</i>  | Fw              | GTG AAG ATC CGC GAC TGG T    |
|                                                                |                      | Re              | AGG CGA GCA TTG TC AAT CTG   |
| Transcription factor SOX-9                                     | Mouse- <i>Sox9</i>   | Fw              | CGA CTA CGC TGA CCA TCA GA   |
|                                                                |                      | Re              | GAC TGG TTG TTC CCA GTG CT   |
| CD133                                                          | Mouse- <i>Prom1</i>  | Fw              | TCT GTT CAG CAT TTC CTC AC   |
|                                                                |                      | Re              | TCA GTA TCG AGA CGG GTC      |
| CD44                                                           | Mouse- <i>CD44</i>   | Fw              | CGT CCA ACA CCT CCC ACT AT   |
|                                                                |                      | Re              | AGC CGC TGC TGA CAT CGT      |
| Keratin, type II cytoskeletal 7                                | Mouse- <i>Ck7</i>    | Fw              | ATC CGC GAG ATC ACC ATC      |
|                                                                |                      | Re              | ATG TGT CTG AGA TCT GCG ACT  |
| Leucine-rich repeats and immunoglobulin-like domains protein 1 | Mouse- <i>Lrig1</i>  | Fw              | AAGGGAACCTCAACTTGGCGAG       |
|                                                                |                      | Re              | ACGTGAGGCCTTCAATCAGC         |
| Octamer-binding transcription factor 4                         | Mouse- <i>Oct4</i>   | Fw              | CTGTAGGGAGGGCTTCGGGCACTT     |
|                                                                |                      | Re              | CTGAGGGCCAGGCAGGAGCACGAG     |
| Homeobox protein NANOG                                         | Mouse- <i>Nanog</i>  | Fw              | AGGGTCTGCTACTGAGATGCTCTG     |
|                                                                |                      | Re              | CAACCACTGGTTTTTCTGCCACCG     |
| SRY (sex determining region Y)-box 2                           | Mouse- <i>Sox2</i>   | Fw              | GGCAGCTACAGCATGATGCAGGAGC    |
|                                                                |                      | Re              | CTGGTCATGGAGTTGTACTGCAGG     |
| Homeodomain-only protein                                       | Mouse- <i>Hopx</i>   | Fw              | CATCCTTAGTCAGACGCGCA         |
|                                                                |                      | Re              | AGGCAAGCCTTCTGACCGC          |
| Telomerase reverse transcriptase                               | Mouse- <i>Tert</i>   | Fw              | GCAGGTGAACAGCCTCCAGACAG      |
|                                                                |                      | Re              | TCCTAACACGCTGGTCAAAGGGAAGC   |
| RNA-binding protein MEX3A                                      | Mouse- <i>Mex3a</i>  | Fw              | ACACCACGGAGTGCGTTC           |
|                                                                |                      | Re              | GTTGGTTTTGGCCCTCAGA          |
| Mucin 5AC                                                      | Mouse- <i>Muc5ac</i> | Fw              | GGACCAAGTGGTTTGACACTGAC      |
|                                                                |                      | Re              | CCTCATAGTTGAGGCACATCCCAG     |
| Epithelial cell adhesion molecule                              | Mouse- <i>Epcam</i>  | Fw              | CGCAGCTCAGGAAGAATGTG         |
|                                                                |                      | Re              | TGAAGTACACTGGCATTGACG        |
| SRY-box 17                                                     | Mouse- <i>Sox17</i>  | Fw              | GGCGCAGCAGAATCCAGA           |
|                                                                |                      | Re              | CCACGACTTGCCACGAT            |
| Cell surface associated or polymorphic epithelial mucin        | Mouse- <i>Muc1</i>   | Fw              | CCCCAGTTGTCTGTTGGGGTC        |
|                                                                |                      | Re              | GGATTCTACCACCACGGAGCC        |
| Glyceraldehyde 3-phosphate dehydrogenase                       | Mouse- <i>Gapdh</i>  | Fw              | TCACCACCATGGAGAAGGC          |
|                                                                |                      | Re              | GCTAAGCAGTTGGTGGTGCA         |
| Beta-glucuronidases                                            | Human- <i>GUSB</i>   | Fw              | CAGGTGATGGAAGAAGTGG          |
|                                                                |                      | Re              | GTTGCTCACAAGGTCACAG          |
| Hypoxanthine phosphoribosyltransferase 1                       | Human- <i>HPRT1</i>  | Fw              | GCTATAAATTCTTTGCTGACCTGCTG   |
|                                                                |                      | Re              | AATTACTTTTATGTCCCCTGTTGACTGG |
| Phosphomannomutase 1                                           | Human- <i>PMM1</i>   | Fw              | CGAGTTCTCCGAAGTGGAC          |
|                                                                |                      | Re              | CTGTTTTTCAGGGCTTCCAC         |
| Leucine-rich repeat-containing G-protein coupled receptor 5    | Human- <i>LGR5</i>   | Fw              | TCAGTCAGCTGCTCCCGAAT         |
|                                                                |                      | Re              | CGTTTCCCGCAAGACGTAAC         |

181 **Supplementary Note:**

182 **Description for Supplementary Data**

183 **[1] Supplementary Data 1**

184 **Content:**

185 The detailed information for *Lgr5-DTRGFP* mice which used to induce liver cancer,  
186 including:

187 1)The mice code

188 2)The mice background

189 3)Primary Code: The corresponding code of initiated primary organoid strain.

190 Black mark: the tissue did not initiate an organoid strain or the strain was already  
191 lost due to infection in the following culture.

192 4)Post Den Time (Month): The sacrifice time after the induction of DEN.

193 5)DEN Administration (Week): Time passed between administration of DEN and  
194 sacrifice.

195 6)Tissue Type: S: tumor surrounding tissue; T: tumor tissue. S—T: initially marked  
196 with tumor surrounding tissue and then characterized as tumor.

197 7)Percentage of LGR5-expressing cells (%): The percentage of LGR5-expressing  
198 cells within each tissue.

199 8)Allograft Strains: The strain code which initiated allograft tumor in the  
200 immunodeficient mice.

201 Remarks: In total, 41 mice were monitored. 10 (mice code:  
202 8,12,17,18,21,22,29,31,35,41) out of 41 mice liver did not show obvious tumor  
203 formation. After the following characterization, 2 (mice code: 8, 22) out of 10  
204 were proven to be liver tumor.

205

206 **[2] Supplementary Data 2**

207 **Content:**

208 The H&E/Gomori/EpCAM/AFP/CK19/GFP staining of primary/allograft tissues  
209 for all the allograft strains.

210

211 **[3] Supplementary Data 3**

212 **Content:**

213 Gene enrichment analysis of the differentially expressed genes between  
214 Untreated LGR5+ Vs. LGR5-, 5-FU-treated LGR5+ Vs. LGR5-, 5-FU-treated Vs.  
215 Untreated LGR5+ and 5-FU-treated Vs. Untreated LGR5- cells.

216

217 **[4] Supplementary Data 4**

218 **Content:**

219 Gene: The differentially expressed genes between untreated LGR5+ cells and  
220 LGR5- cells.

221 Gene description: The gene description.

222 Survival Analyses: Online database (The Human Protein Atlas,  
223 <http://www.proteinatlas.org/>).

224 P value for Survival Analyses: Online database (The Human Protein Atlas,  
225 <http://www.proteinatlas.org/>).

226

227 **[5] Supplementary Data 5**

228 **Content:**

229 The detailed information for single cells isolated from DEN induced murine livers  
230 and allograft tumors, then used for organoid initiation, including:

231 1)Code: The corresponding tissues of DEN induced murine livers or allograft  
232 tumors. Green mark: the groups did initiate organoids after sorting.

233 2) Initiated organoid number for each group.

234 3) Organoid initiated efficiency (%) for each group.

235 Remarks: In total 89 tissues were collected. Among them, 71 tissues were sorted for  
236 following single cell initiation; 18 tissues were failed for the sort due to FACS machine  
237 issue or other technical reasons.

238

## 239 **[6] Supplementary Data 6**

### 240 **Content:**

241 The detailed information for single cells isolated from DEN induced murine livers,  
242 then injected directly into immunodeficient mice for tumor formation, including:

243 1)Code: The corresponding tissues of DEN induced murine livers and initiated  
244 allograft tumors. Green mark: the groups did initiate tumors after sorting.

245 2) Injected cell number for each group.

246 3) Pictures of primary tumors and corresponding allograft tumors.

247
