# Supplementary material for: LGR5 marks targetable tumor-initiating cells in mouse liver cancer
Source: PubMed Central journal article supplement (PMC7181628; doi:10.1038/s41467-020-15846-0), 2020-04-23
Supplement: 41467_2020_15846_MOESM4_ESM.pdf [file 41467_2020_15846_MOESM4_ESM.pdf]

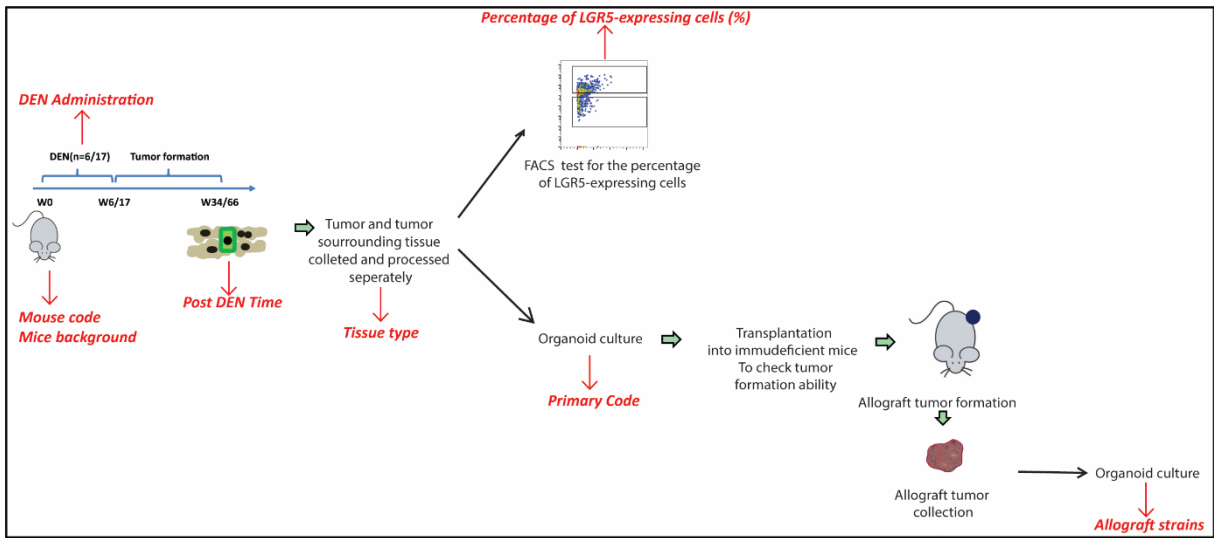

| Mouse Code | Mice Background | Primary Code | Post Den Time (Month) | DEN Administration (Week) | Tissue Type | Percentage of LGR5-expressing cells (%) | Allograft Strains |
|------------|-----------------|--------------|-----------------------|---------------------------|-------------|-----------------------------------------|-------------------|
| M1         | B6              | PT1          | 7                     | 6                         | S           | 0,28                                    |                   |
|            |                 | PT2          |                       |                           | T           | 0,16                                    |                   |
| M2         | B6              | PT3          | 7                     | 6                         | S           | 0,79                                    |                   |
|            |                 | PT4          |                       |                           | T           | 1,1                                     |                   |
| M3         | B6              | PT5          | 12                    | 6                         | S           | 0,16                                    |                   |
|            |                 | PT6          |                       |                           | T           | 0,18                                    |                   |
| M4         | B6              | PT7          | 9                     | 6                         | S           | 0,57                                    |                   |
|            |                 | PT8          |                       |                           | T1          | 5,66                                    | AL8               |
|            |                 | PT9          |                       |                           | T2          | 0,32                                    |                   |
|            |                 | PT10         |                       |                           | T3          | 5,61                                    | AL10              |
| M5         | B6              | PT11         | 9                     | 6                         | S           | 0,22                                    |                   |
|            |                 | PT12         |                       |                           | T           | 2,5                                     |                   |
| M6         | B6&C3H          | PT13         | 5                     | 17                        | S           | 0                                       | AL13              |
|            |                 | PT14         |                       |                           | T           | 2,75                                    |                   |
| M7         | B6              | PT15         | 13                    | 6                         | S           | 0,4                                     |                   |
|            |                 | PT16         |                       |                           | T           | 2,07                                    |                   |
| M8         | B6              | PT17         | 13                    | 6                         | S--T        | 0,31                                    | AL17              |
| M9         | B6              | PT18         | 12                    | 6                         | S           | 1,1                                     |                   |
|            |                 | PT19         |                       |                           | T           | 3,05                                    |                   |
| M10        | B6              | PT20         | 15                    | 6                         | S           | 0,85                                    |                   |
|            |                 | PT21         |                       |                           | T1          | 2,85                                    |                   |
|            |                 | PT22         |                       |                           | T2          | 1,43                                    |                   |
| M11        | B6              | PT23         | 15                    | 6                         | S           | 0,89                                    |                   |
|            |                 | PT24         |                       |                           | T           | 0,17                                    |                   |



| Mouse Code | Mice background | Primary code | Post Den time | DEN |    | Lgr5 expression | Allograft strains |
|------------|-----------------|--------------|---------------|-----|----|-----------------|-------------------|
| M24        | B6&C3H          | PT47         | 7             | 17  | S  | 25              |                   |
|            |                 | PT48         |               |     | T1 | 46,1            |                   |
|            |                 | PT49         |               |     | T2 | 55,6            |                   |
|            |                 | PT50         |               |     | T3 | 51,2            |                   |
| M25        | B6              | PT51         | 14            | 6   | T  | 4,63            |                   |
| M26        | B6              | PT52         | 14            | 6   | S  | 0,021           |                   |
|            |                 | PT53         |               |     | T  | 0               |                   |
| M27        | B6&C3H          | PT54         | 7             | 17  | T  | 7,73            |                   |
| M28        | B6              | PT55         | 8             | 17  | S  | 20,3            |                   |
|            |                 | PT56         |               |     | T1 | 10,7            |                   |
|            |                 | PT57         |               |     | T2 | 1,67            |                   |
|            |                 | PT58         |               |     | T3 | 0,48            |                   |
|            |                 | PT59         |               |     | T4 | 4,66            |                   |
| M29        | B6              | PT60         | 15            | 6   | S  | 0,4             |                   |
| M30        | B6&C3H          | PT61         | 8             | 17  | T1 | 2,62            | AL61              |
|            |                 | PT62         |               |     | T2 | 7,01            | AL62              |
|            |                 | PT63         |               |     | T3 | 10,5            |                   |
| M31        | B6&C3H          | PT64         | 8             | 17  | S  | 0,3             |                   |
| M32        | B6              | PT65         | 15            | 6   | S  | 20,3            |                   |
|            |                 | PT66         |               |     | T1 | 1,04            |                   |
|            |                 | PT67         |               |     | T2 | 8,03            |                   |
| M33        | B6              | PT68         | 15            | 6   | T1 | 47,9            |                   |
|            |                 | PT69         |               |     | T2 | 17,4            |                   |
|            |                 | PT70         |               |     | T3 | 4,69            |                   |

| Mouse Code | Mice background | Primary code | Post Den time | DEN |    | Lgr5 expression | Allograft strains |
|------------|-----------------|--------------|---------------|-----|----|-----------------|-------------------|
| M34        | B6              | PT71         | 15            | 6   | S  | 17,4            |                   |
|            |                 | PT72         |               |     | T1 | 3,86            |                   |
|            |                 | PT73         |               |     | T2 | 21,6            |                   |
| M35        | B6              | PT74         | 15            | 6   | S  | 0,22            |                   |
| M36        | B6              | PT75         | 15            | 6   | S  | 0,25            |                   |
|            |                 | PT76         |               |     | T  | 3,41            |                   |
| M37        | B6              | PT77         | 15            | 6   | T1 | 1,41            |                   |
|            |                 | PT78         |               |     | T2 | 0,23            |                   |
|            |                 | PT79         |               |     | T3 | 0,65            |                   |
| M38        | B6&C3H          | PT80         | 8             | 17  | S  | 0,26            |                   |
|            |                 | PT81         |               |     | T  | 0,14            |                   |
| M39        | B6              | PT82         | 13            | 6   | T1 | 0,29            |                   |
|            |                 | PT83         |               |     | T2 | 5,13            |                   |
|            |                 | PT84         |               |     | T3 | 0,18            | AL84              |
|            |                 | PT85         |               |     | T4 | 8.90            | AL85              |
| M40        | B6&C3H          | PT86         | 7             | 17  | T1 | 14,6            |                   |
|            |                 | PT87         |               |     | T2 | 6,82            |                   |
|            |                 | PT88         |               |     | T3 | 13,9            |                   |
| M41        | B6&C3H          | PT89         | 8             | 17  | S  | 0,21            |                   |

| <b>Group Code</b> | <b>Group</b>                                       | <b>Tissue Number</b> | <b>Lgr5 Expression</b> |
|-------------------|----------------------------------------------------|----------------------|------------------------|
| <b>A</b>          | <b>The collected mice liver tissue</b>             | <b>89</b>            | <b>5.583%</b>          |
| <b>B</b>          | <b>The mice liver which did not initiate tumor</b> | <b>8</b>             | <b>0.325%</b>          |
| <b>C</b>          | <b>Tumor surrounding tissue</b>                    | <b>34</b>            | <b>2.930%</b>          |
| <b>D</b>          | <b>Tumor tissue</b>                                | <b>55</b>            | <b>7.294%</b>          |
