# Supplementary material for: LGR5 marks targetable tumor-initiating cells in mouse liver cancer
Source: PubMed Central journal article supplement (PMC7181628; doi:10.1038/s41467-020-15846-0), 2020-04-23
Supplement: 41467_2020_15846_MOESM5_ESM.pdf [file 41467_2020_15846_MOESM5_ESM.pdf]

# SAL1

Primary: H&E

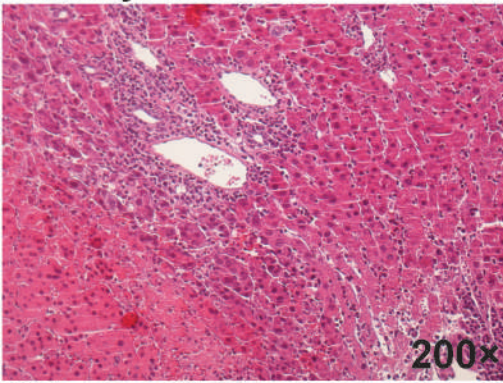

Primary: Gomori

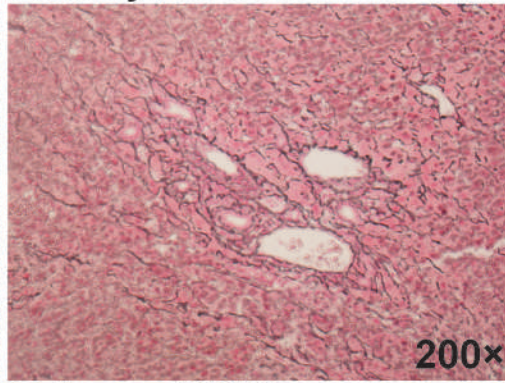

Primary: EpCAM

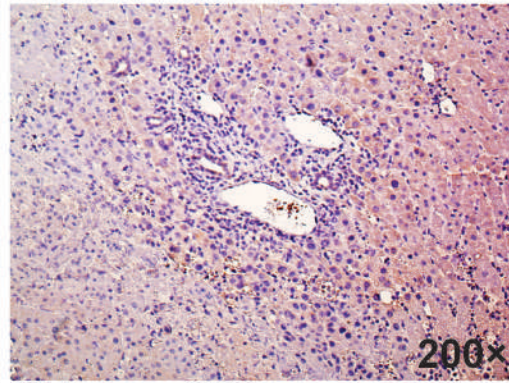

Primary: AFP

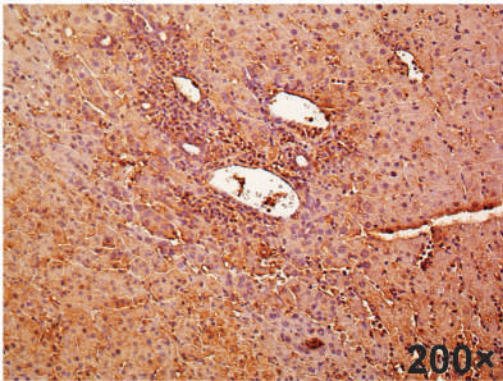

Primary: CK19

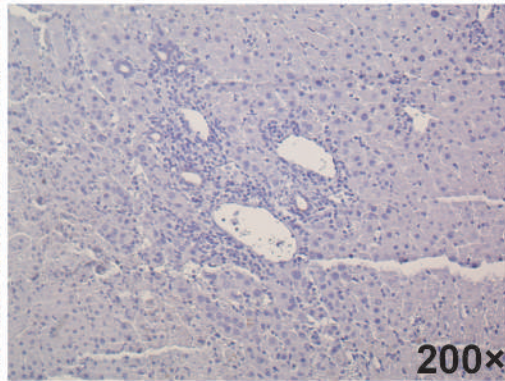

Primary: GFP

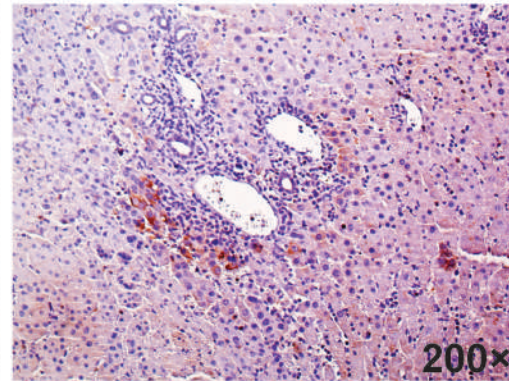

Allograft: H&E

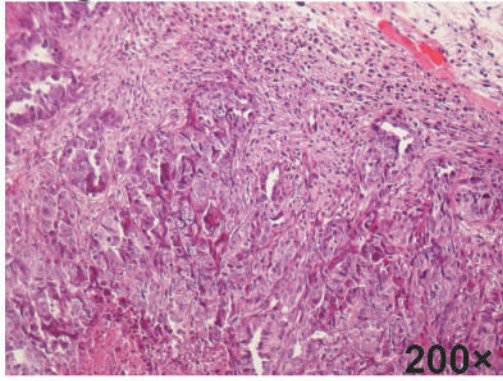

Allograft: Gomori

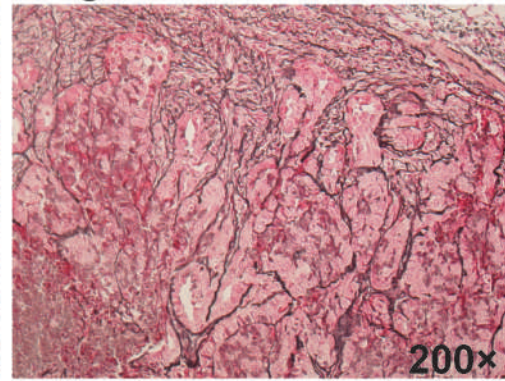

Allograft: EpCAM

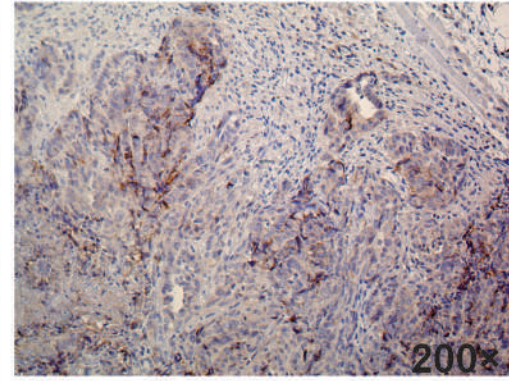

Allograft AFP

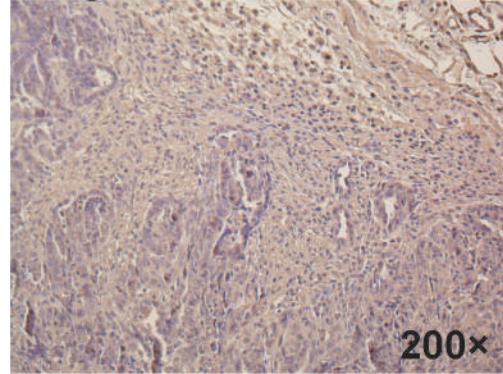

Allograft: CK19

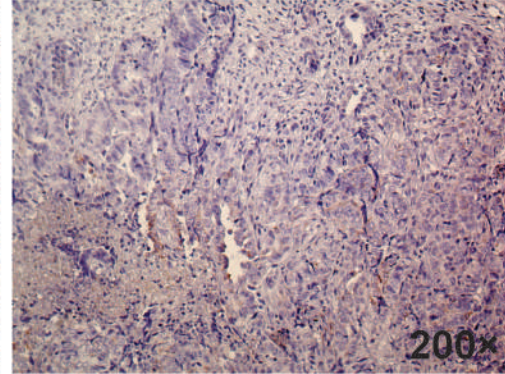

Allograft: GFP

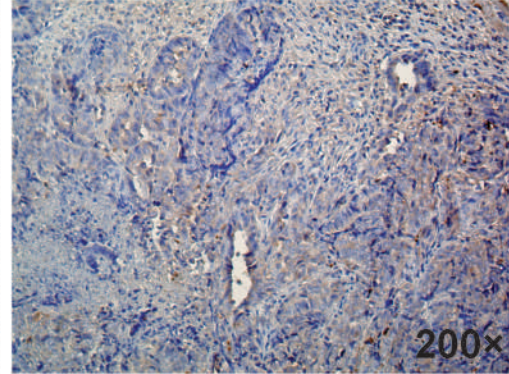

Allograft Organoid

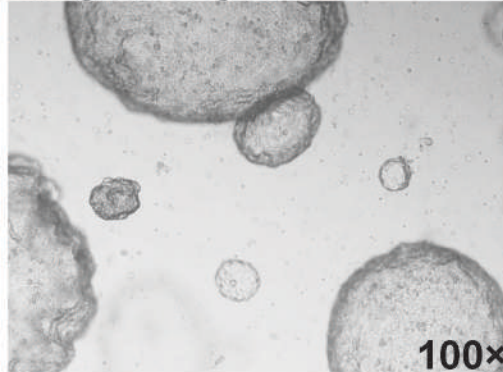

Allograft tumor type: CC/CHC



# SAL2

Primary: H&E

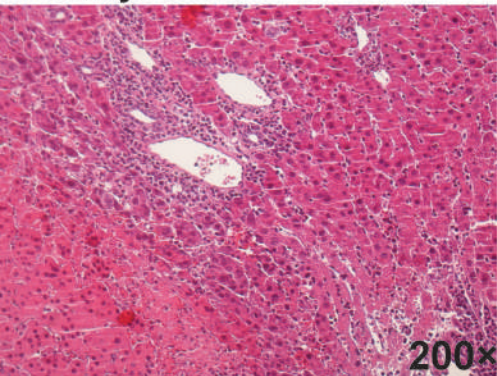

Primary: Gomori

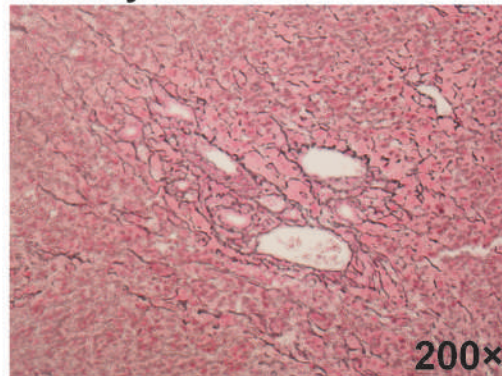

Primary: EpCAM

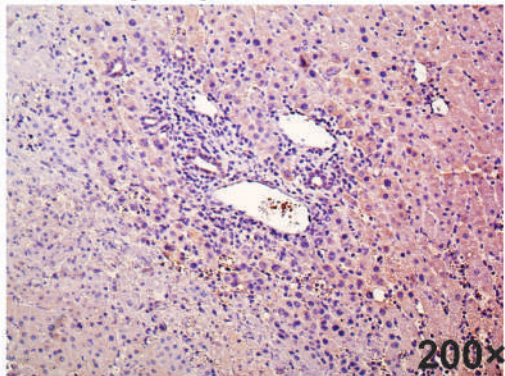

Primary: AFP

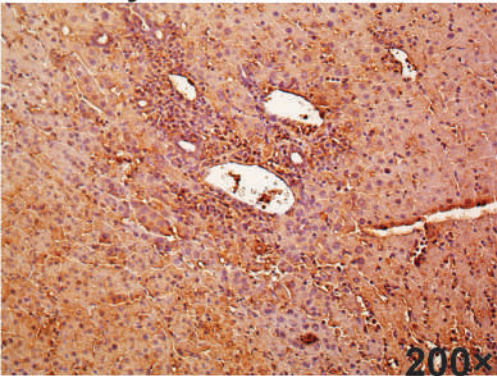

Primary: CK19

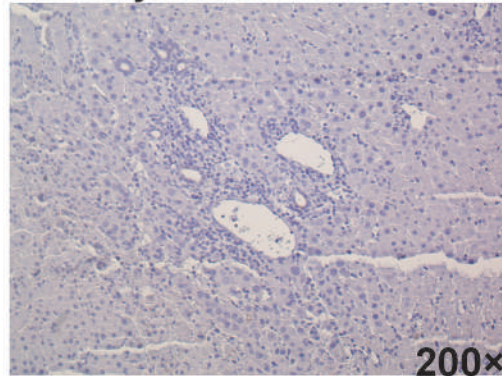

Primary: GFP

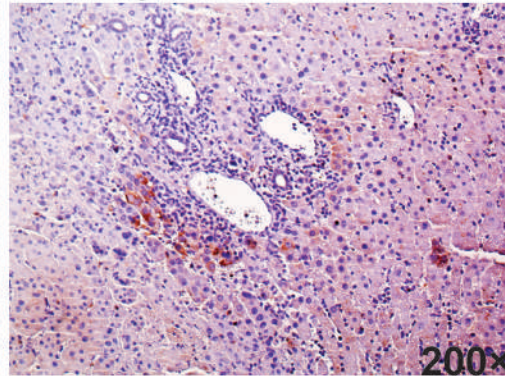

Allograft: H&E

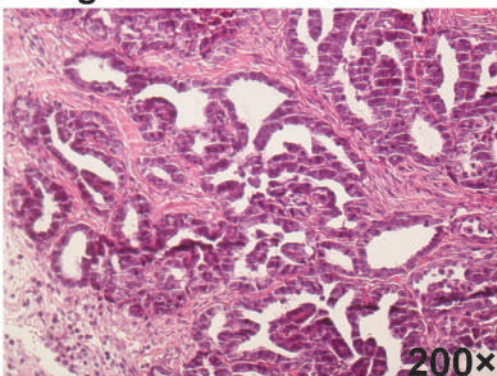

Allograft: Gomori

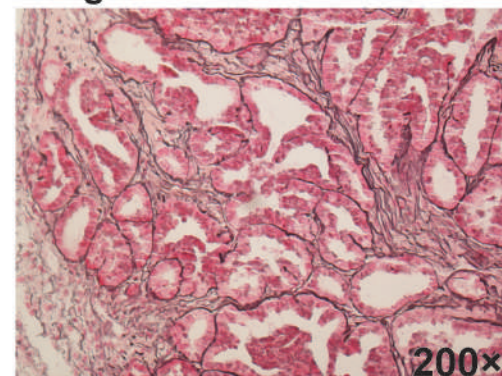

Allograft: EpCAM

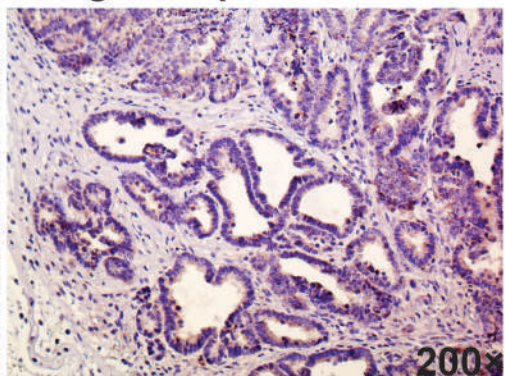

Allograft AFP

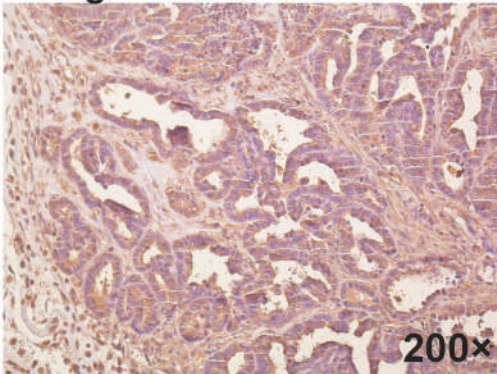

Allograft: CK19

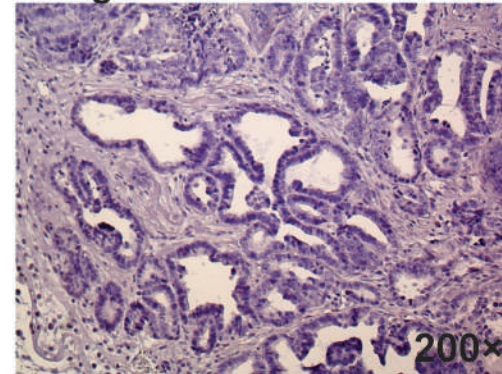

Allograft: GFP

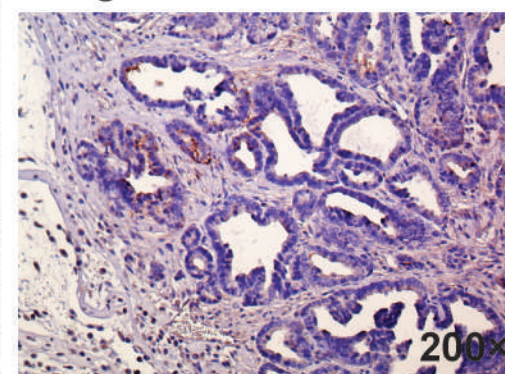

Allograft Organoid

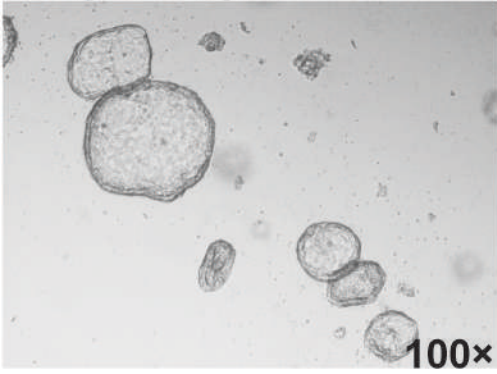

Allograft tumor type: CC/CHC



# SAL3

Primary: H&E

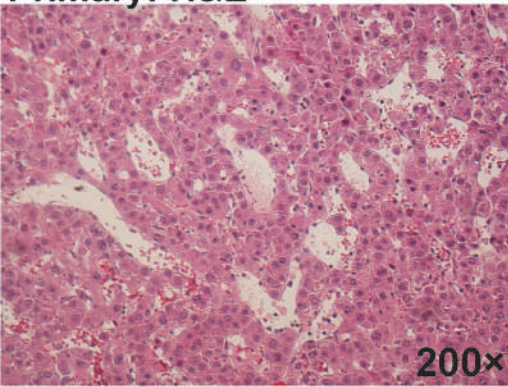

Primary: Gomori

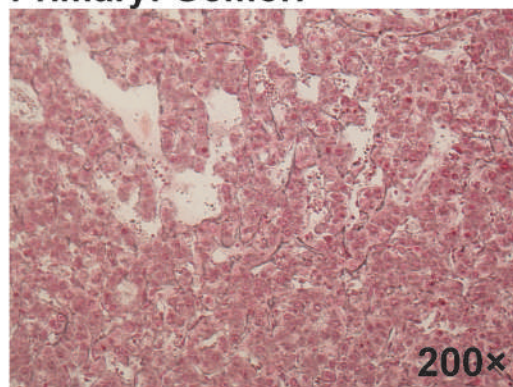

Primary: EpCAM

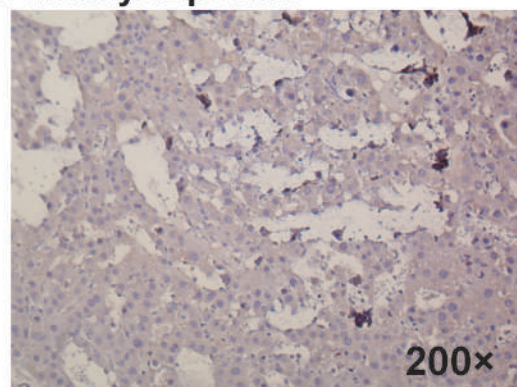

Primary: AFP

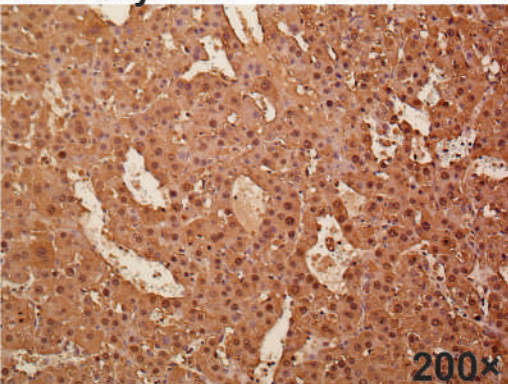

Primary: CK19

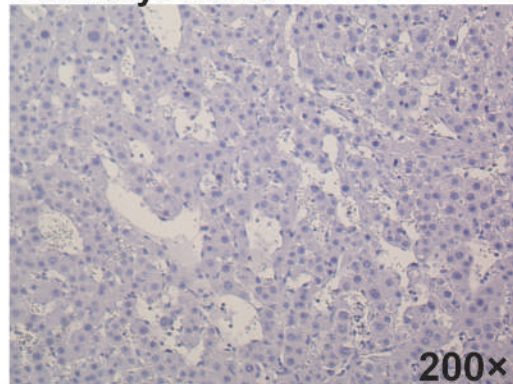

Primary: GFP

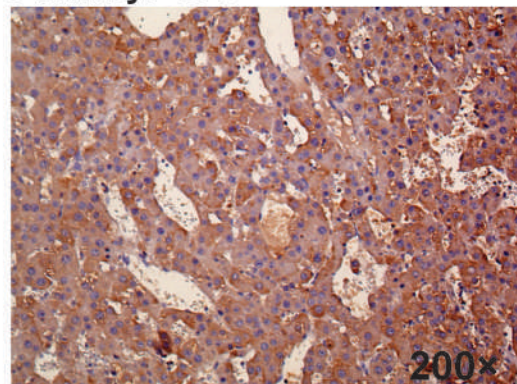

Allograft: H&E

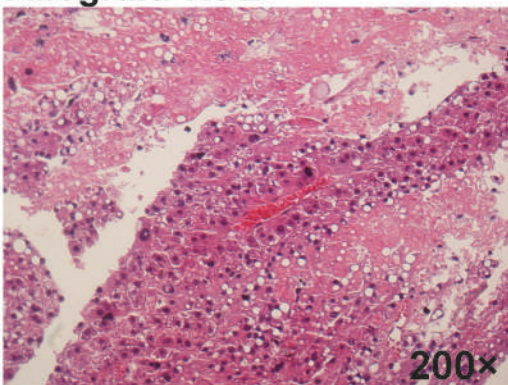

Allograft: Gomori

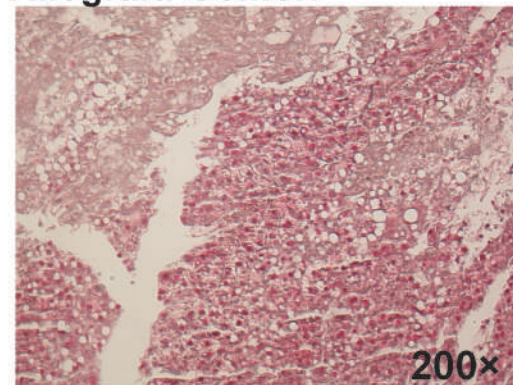

Allograft: EpCAM

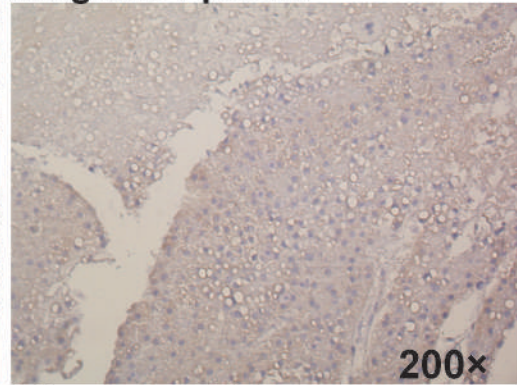

Allograft AFP

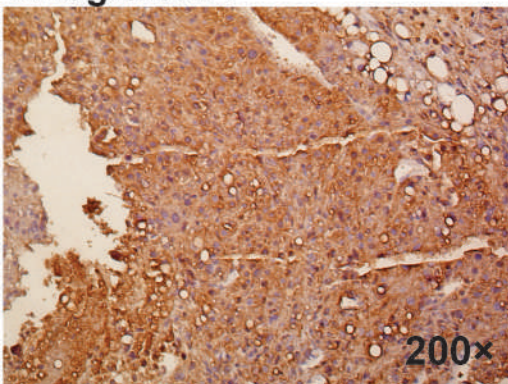

Allograft: CK19

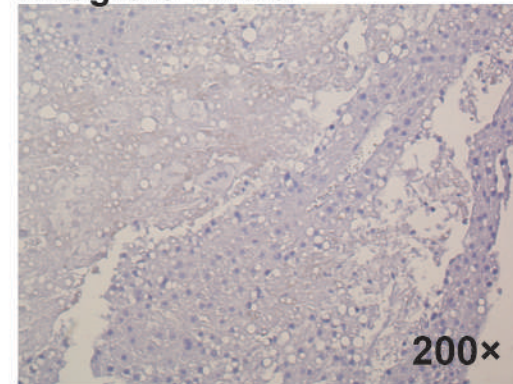

Allograft: GFP

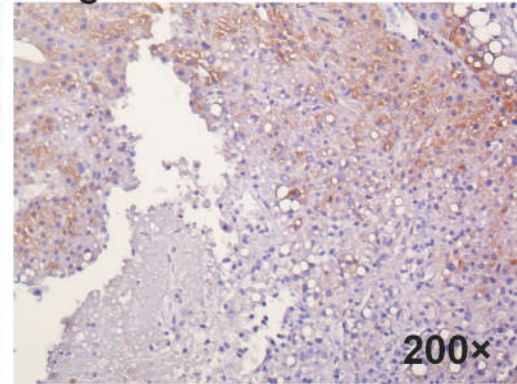

Allograft tumor type: HCC

Strain lost due to stop proliferation ex vivo



# SAL4

Primary: H&E

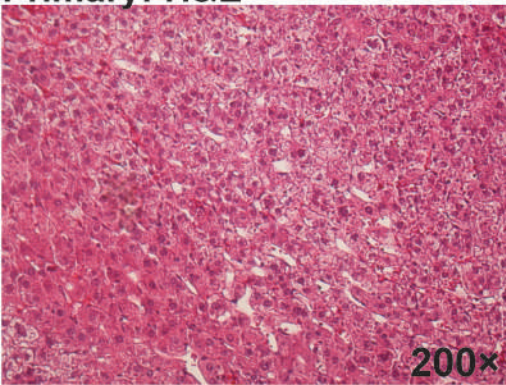

Primary: Gomori

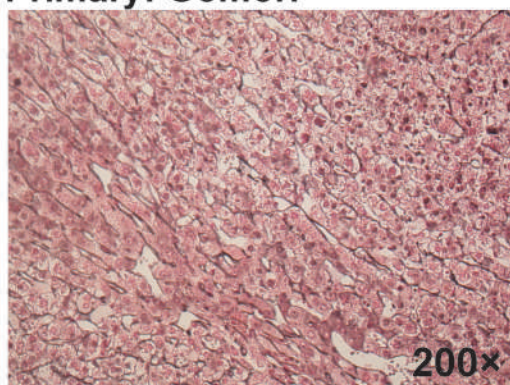

Primary: EpCAM

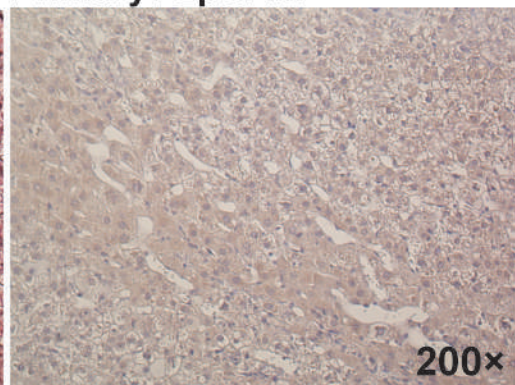

Primary: AFP

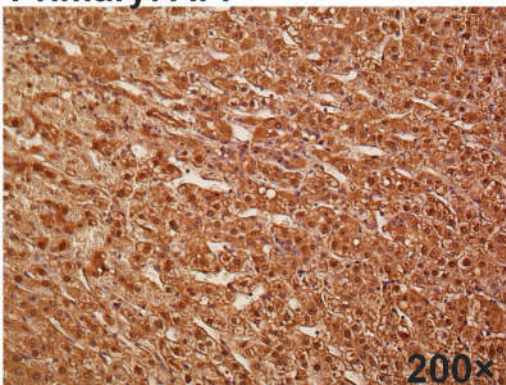

Primary: CK19

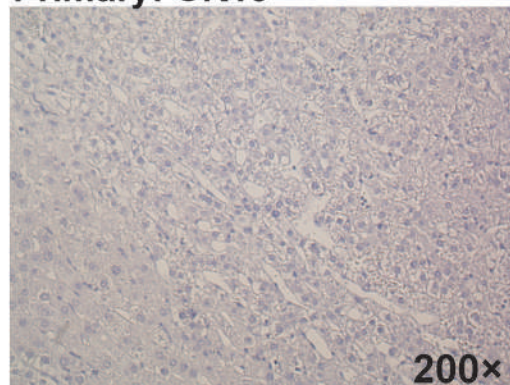

Primary: GFP

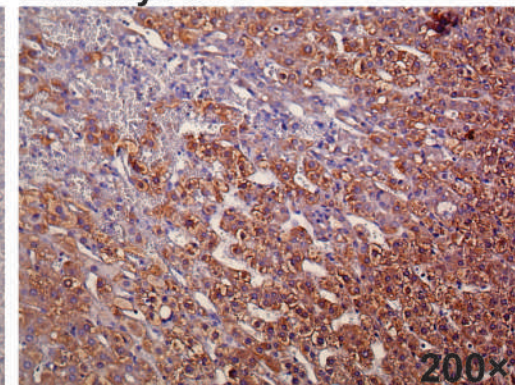

Allograft: H&E

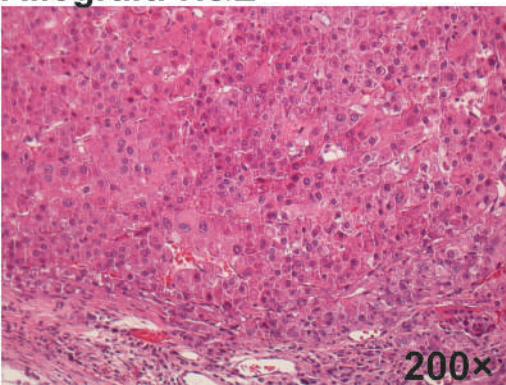

Allograft: Gomori

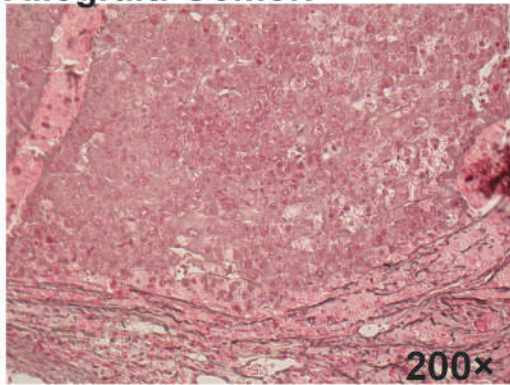

Allograft: EpCAM

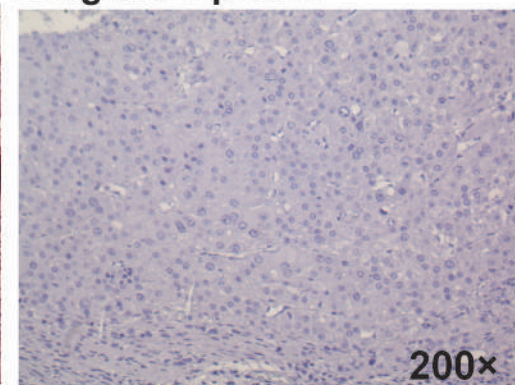

Allograft AFP

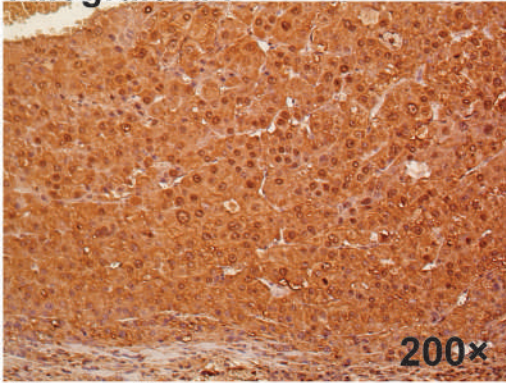

Allograft: CK19

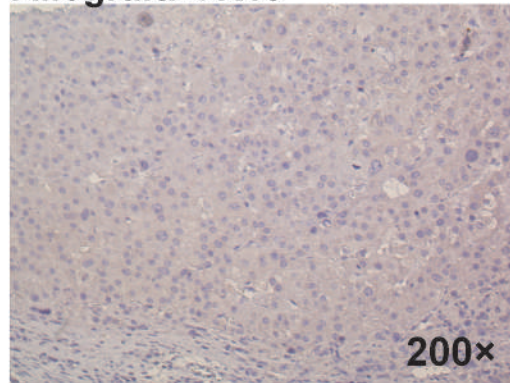

Allograft: GFP

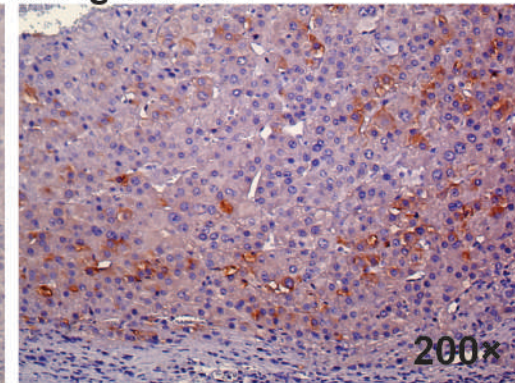

Allograft Organoid

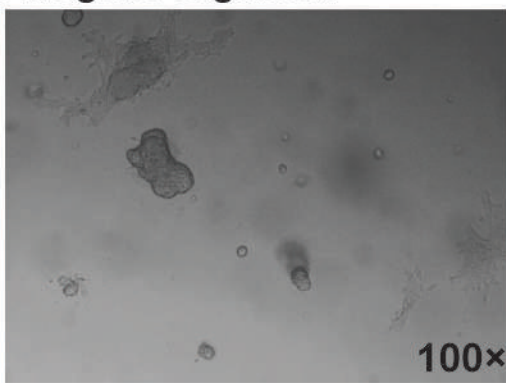

Allograft tumor type: HCC



# AL8

Primary: H&E

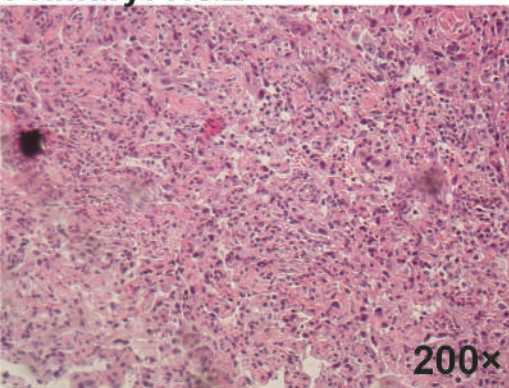

Primary: Gomori

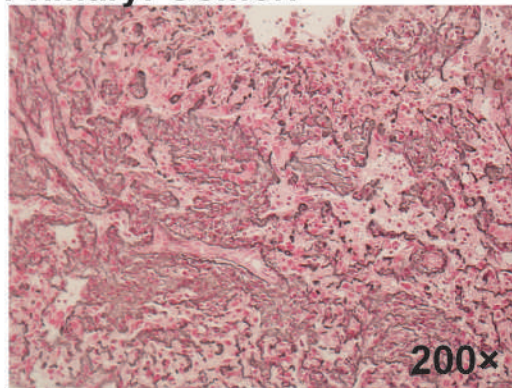

Primary: EpCAM

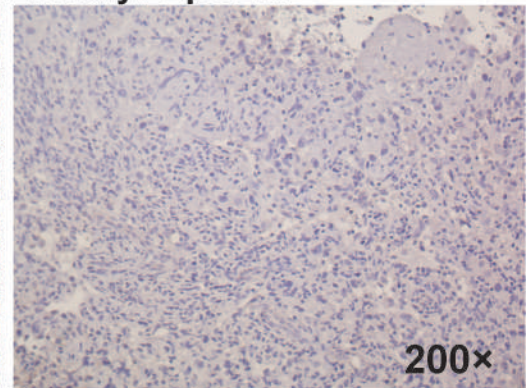

Primary: AFP

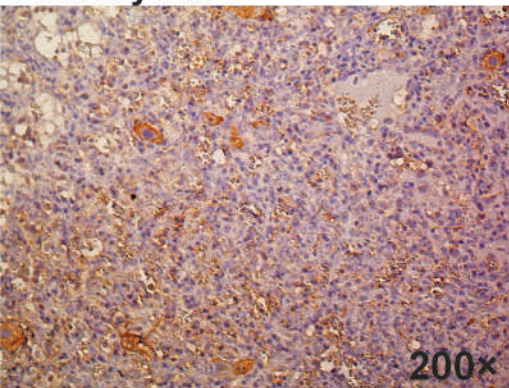

Primary: CK19

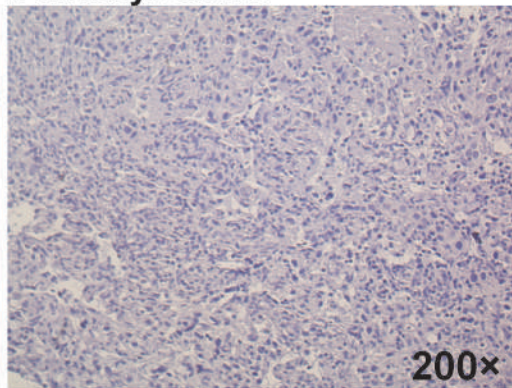

Primary: GFP

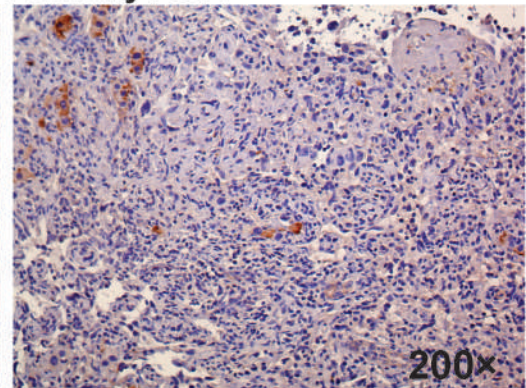

Allograft tumor type: Unclear  
Strain lost due to stop proliferation ex vivo



# AL10

Primary: H&E

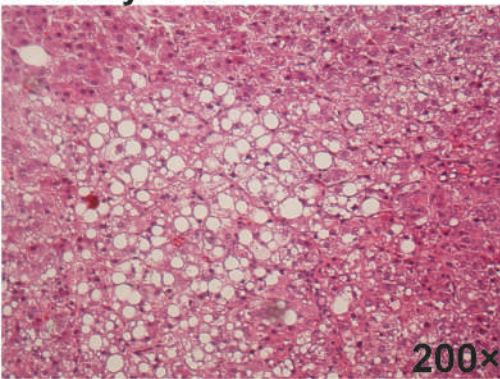

Primary: Gomori

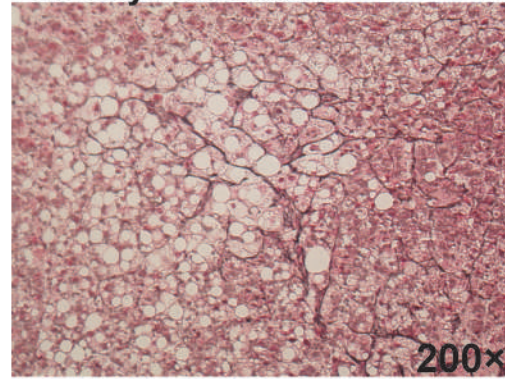

Primary: EpCAM

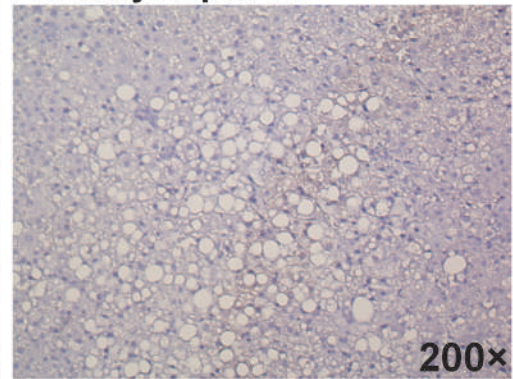

Primary: AFP

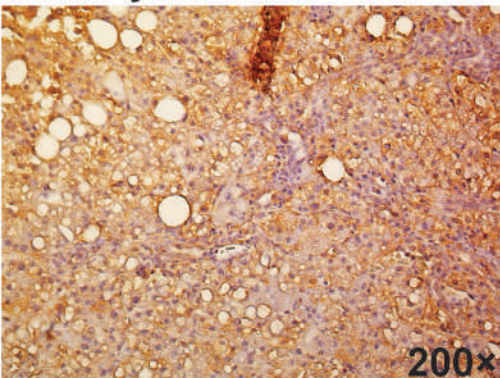

Primary: CK19

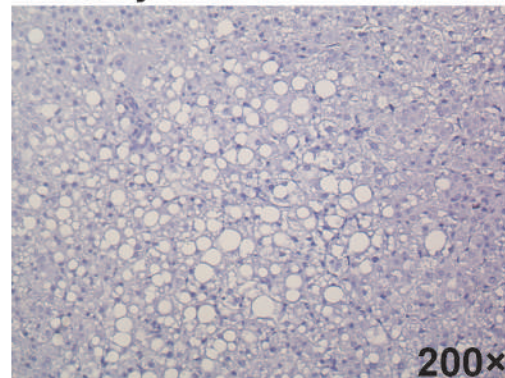

Primary: GFP

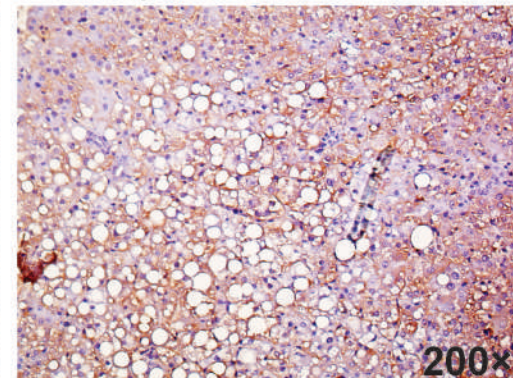

Allograft: H&E

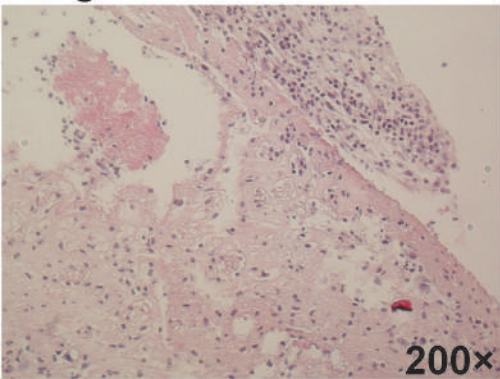

Allograft: Gomori

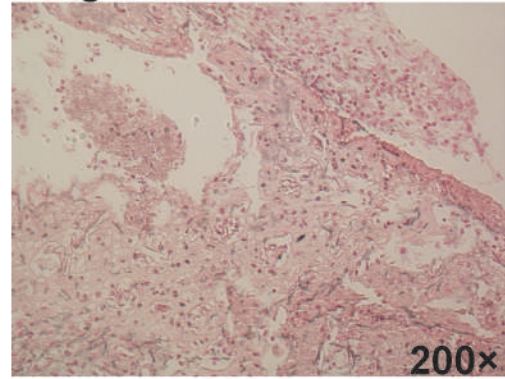

Allograft: EpCAM

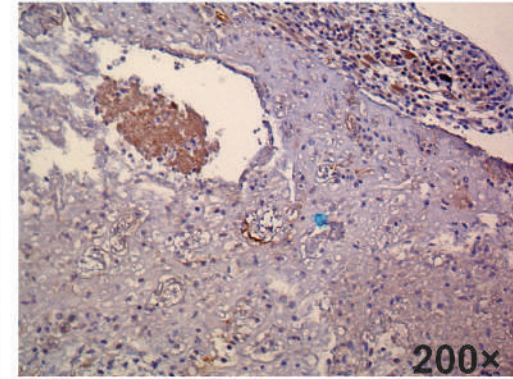

Allograft AFP

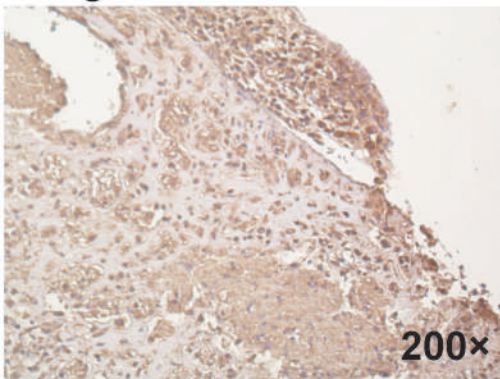

Allograft: CK19

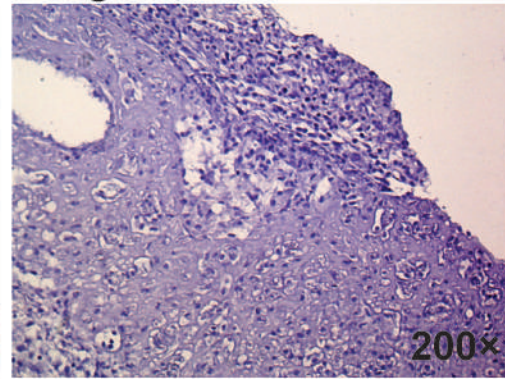

Allograft: GFP

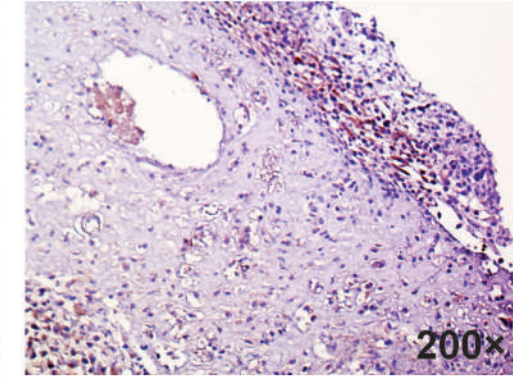

Allograft Organoid

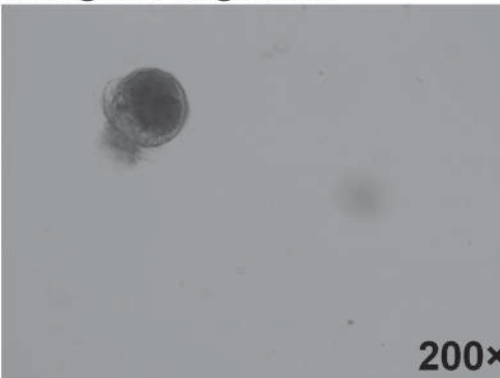

Allograft tumor type: Unclear



# AL13

Primary: H&E

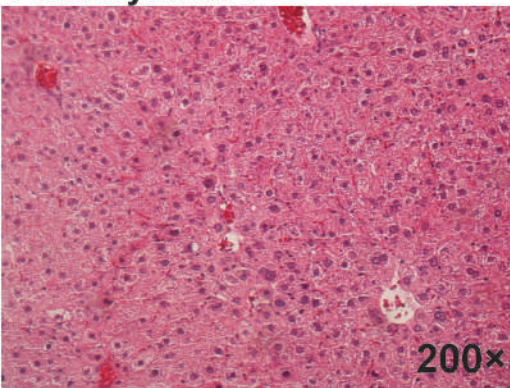

Primary: Gomori

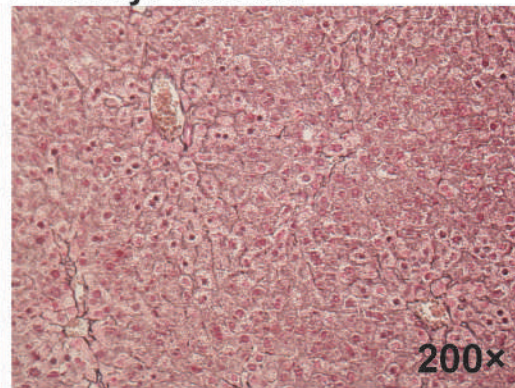

Primary: EpCAM

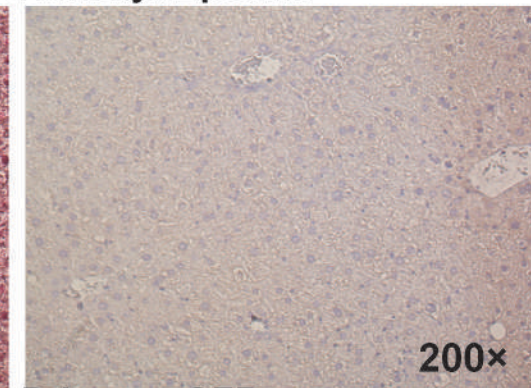

Primary: AFP

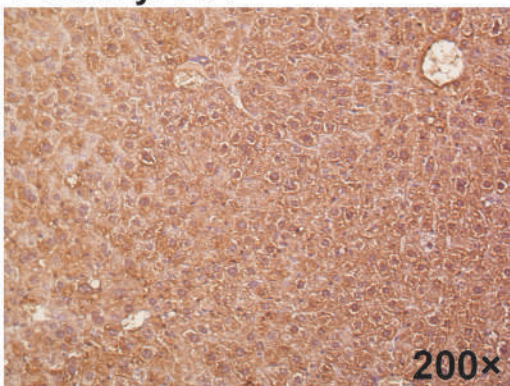

Primary: CK19

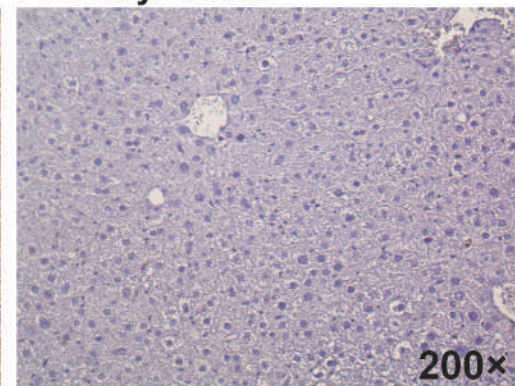

Primary: GFP

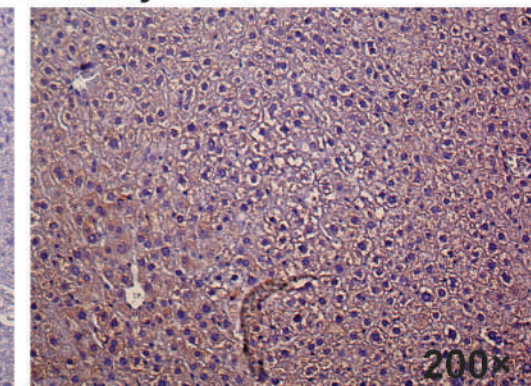

Allograft: H&E

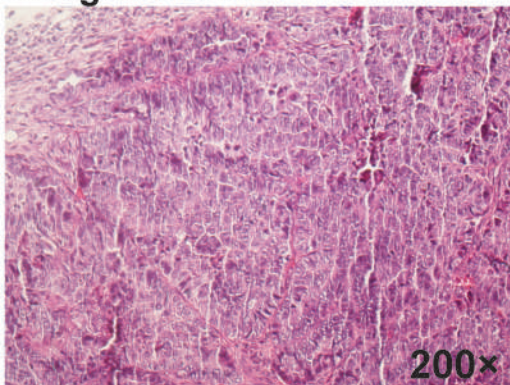

Allograft: Gomori

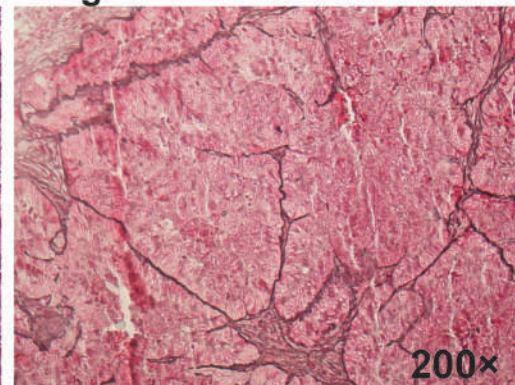

Allograft: EpCAM

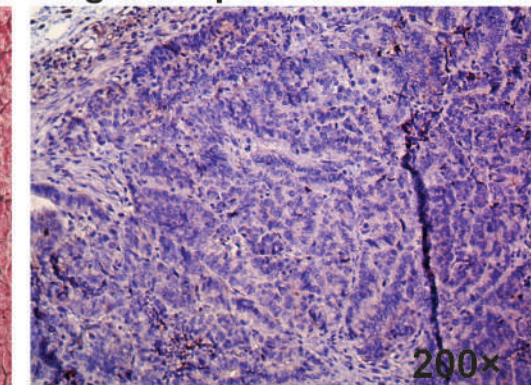

Allograft AFP

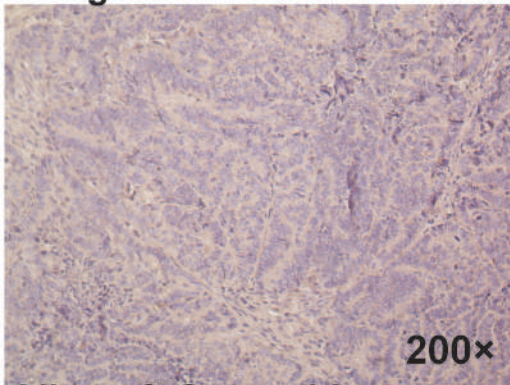

Allograft: CK19

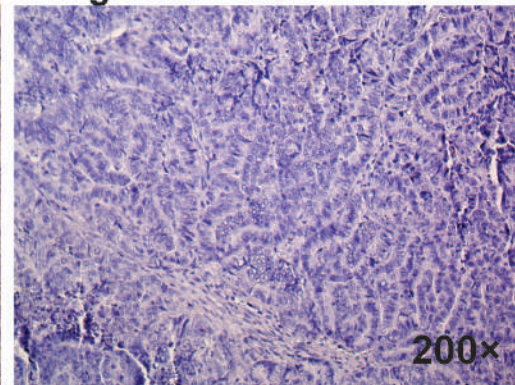

Allograft: GFP

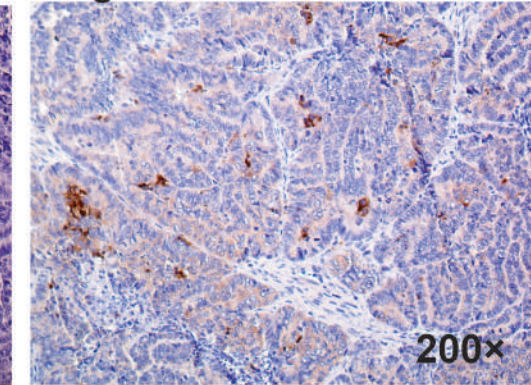

Allograft Organoid

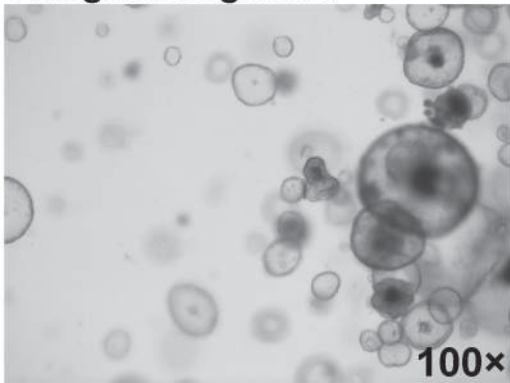

Allograft tumor type: CC/CHC



# AL17

Primary: H&E

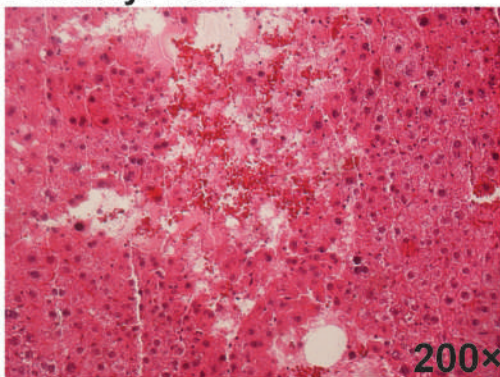

Primary: Gomori

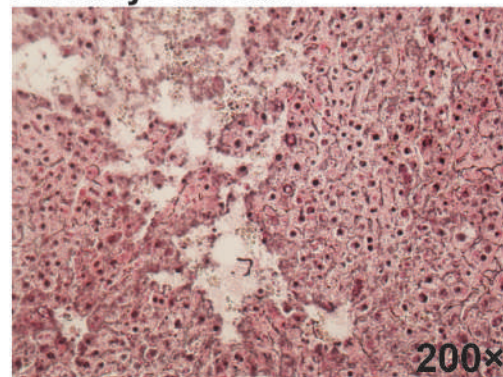

Primary: EpCAM

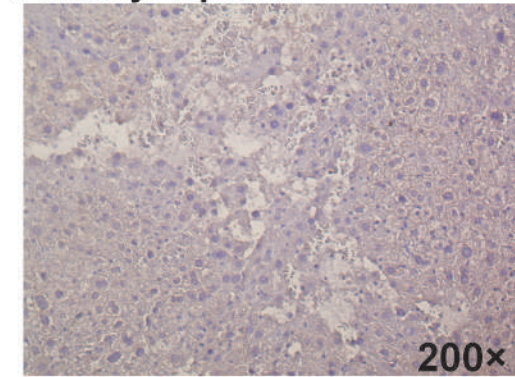

Primary: AFP

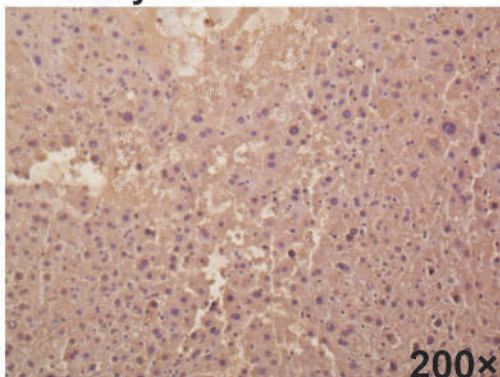

Primary: CK19

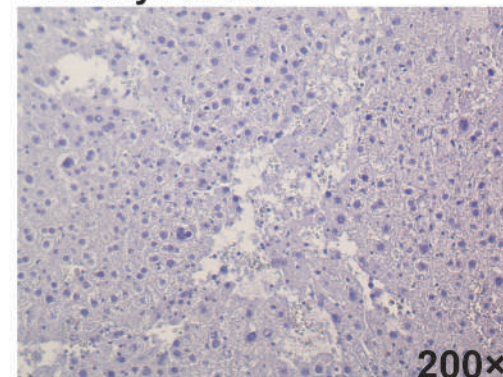

Primary: GFP

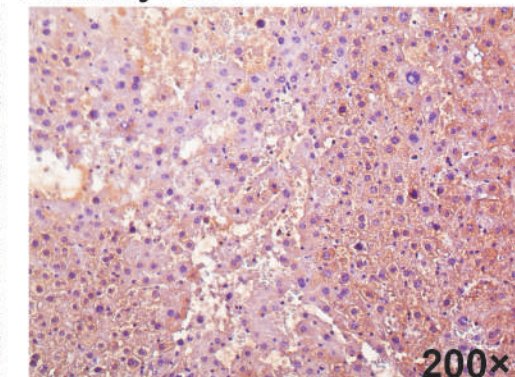

Allograft: H&E

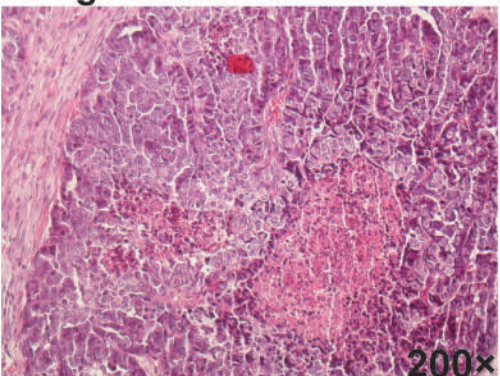

Allograft: Gomori

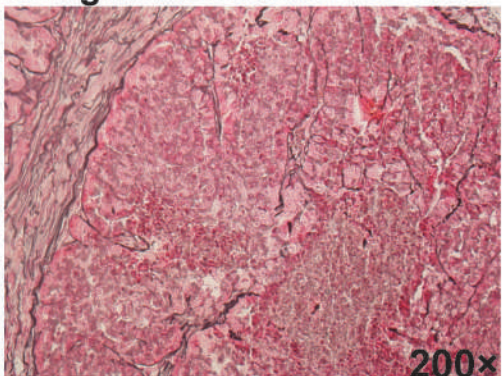

Allograft: EpCAM

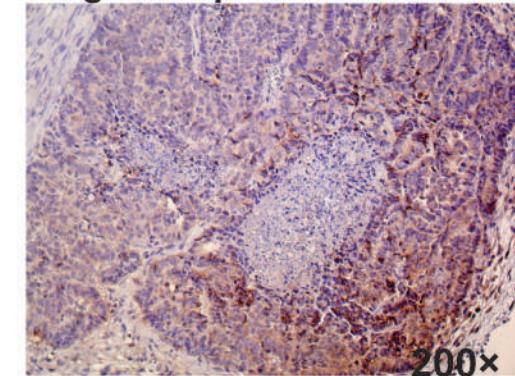

Allograft AFP

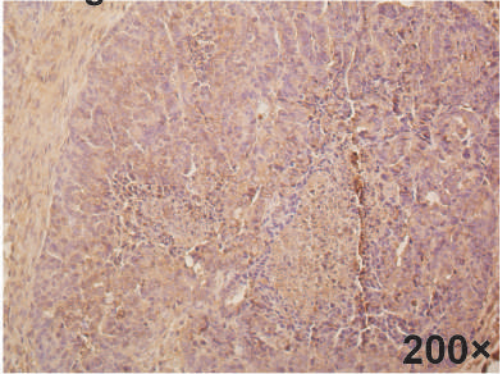

Allograft: CK19

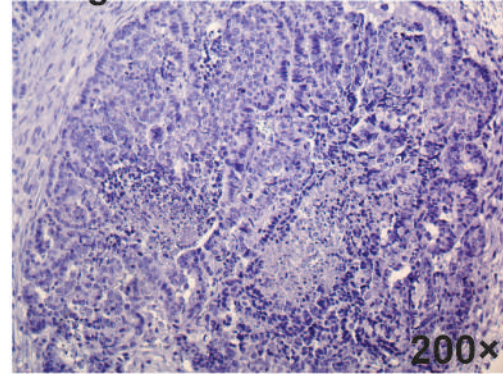

Allograft: GFP

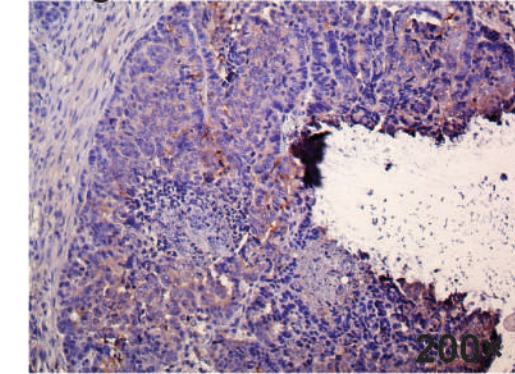

Allograft Organoid

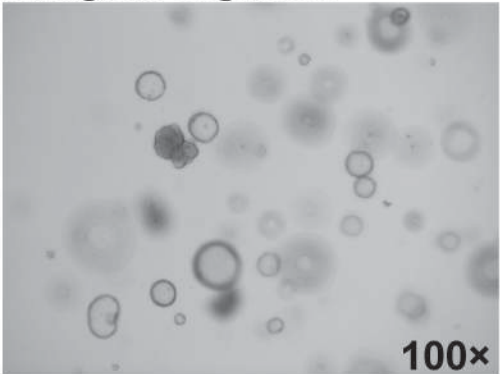

Allograft tumor type: CC/CHC



# AL38

Primary: H&E

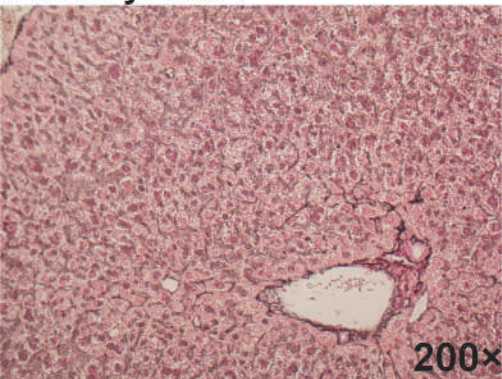

Primary: Gomori

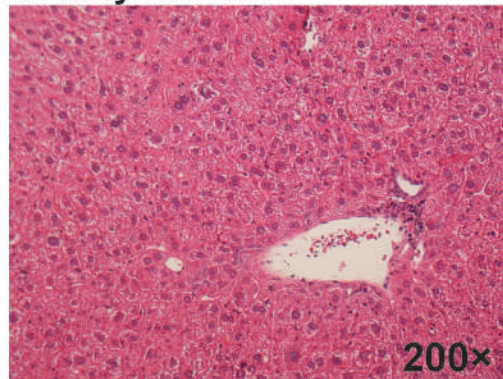

Primary: EpCAM

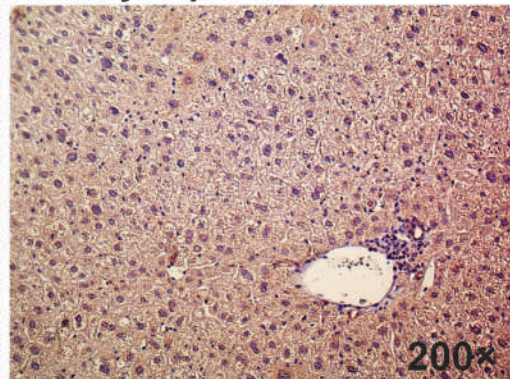

Primary: AFP

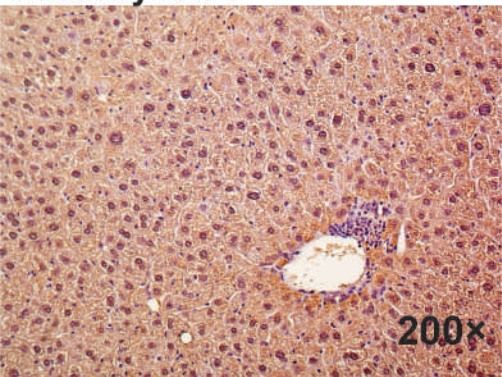

Primary: CK19

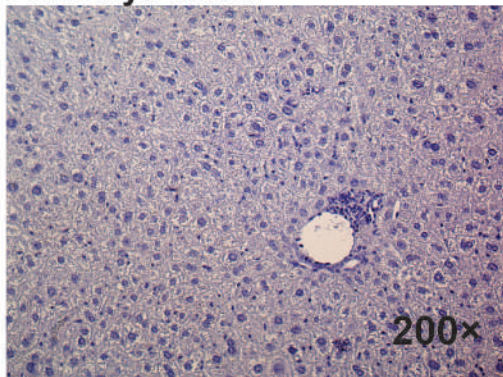

Primary: GFP

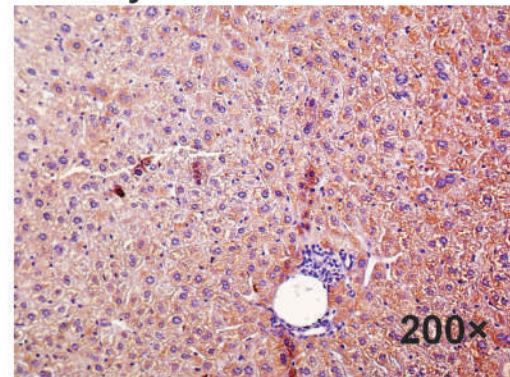

Allograft: H&E

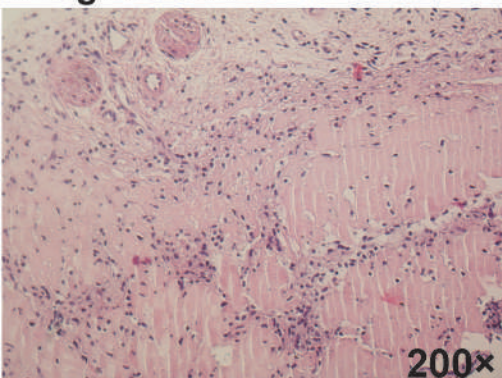

Allograft: Gomori

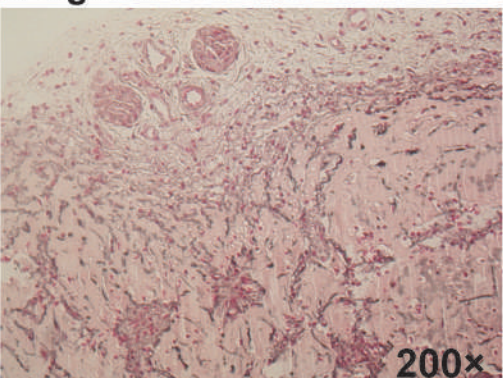

Allograft: EpCAM

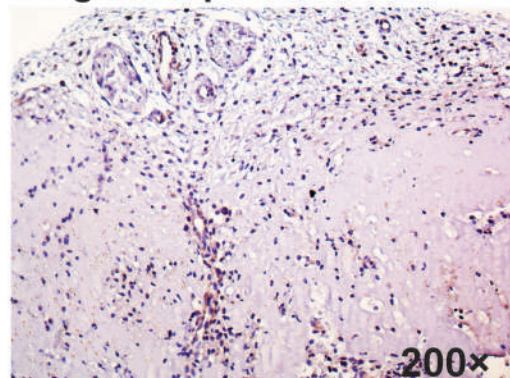

Allograft AFP

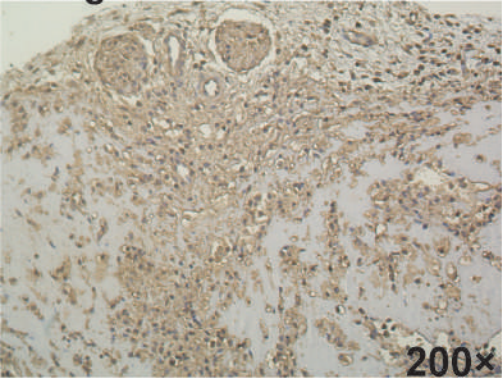

Allograft: CK19

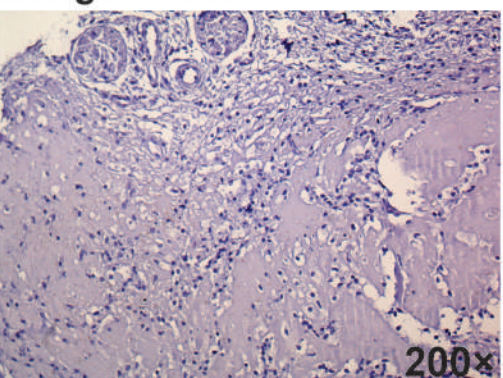

Allograft: GFP

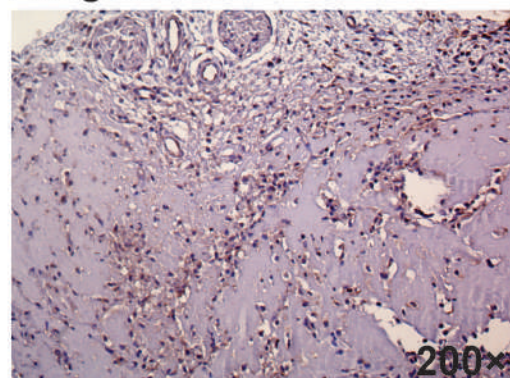

Allograft Organoid

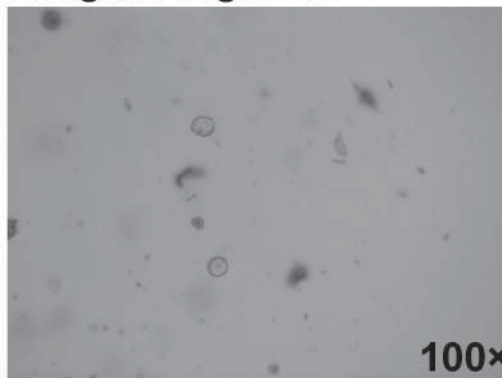

Allograft tumor type: Unclear



# AL43

Primary: H&E

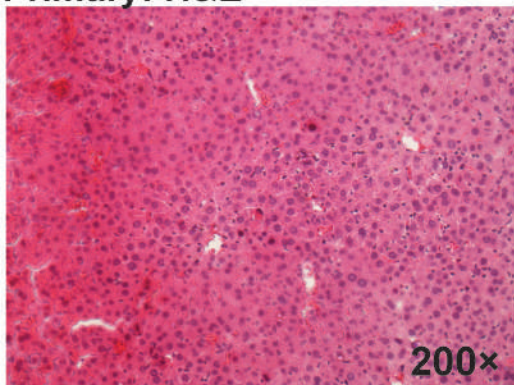

Primary: Gomori

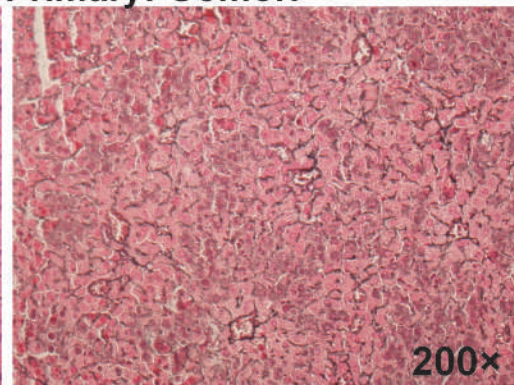

Primary: EpCAM

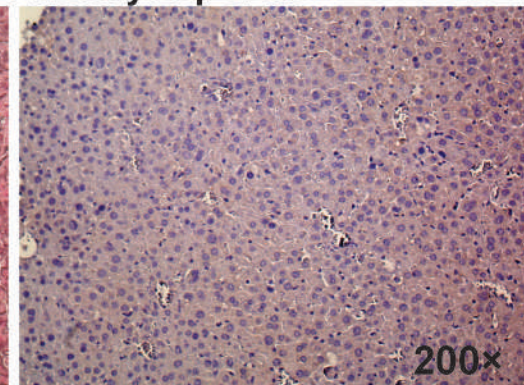

Primary: AFP

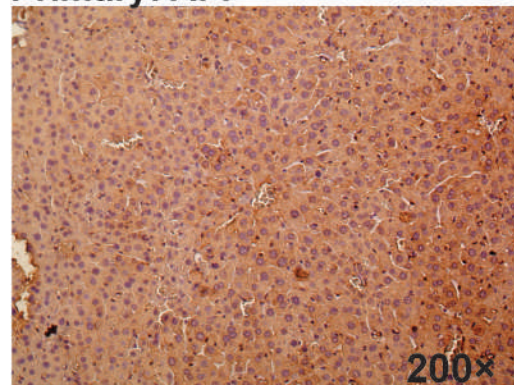

Primary: CK19

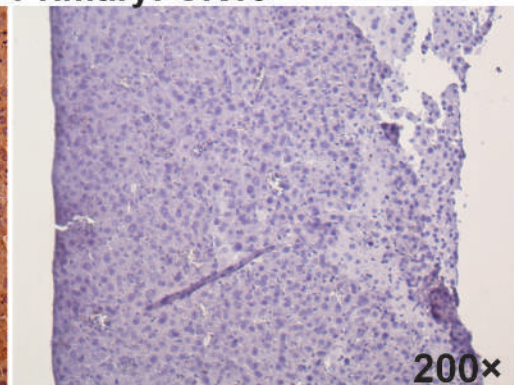

Primary: GFP

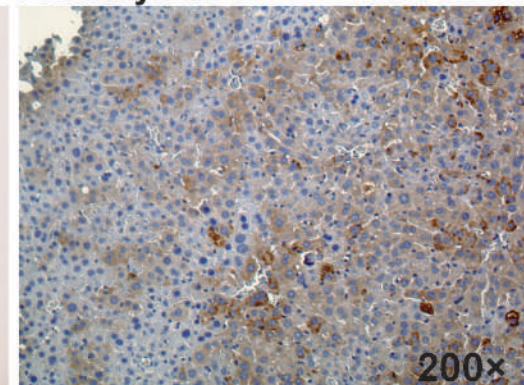

Allograft: H&E

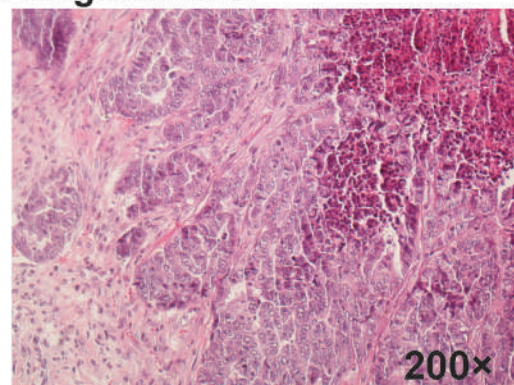

Allograft: Gomori

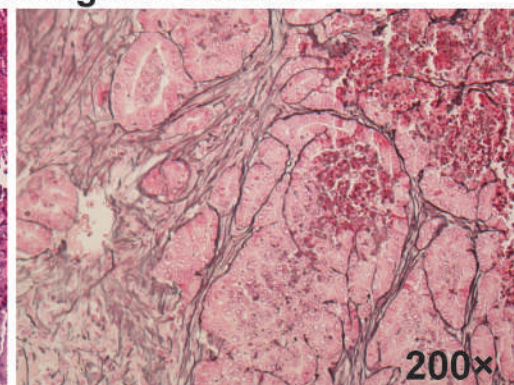

Allograft: EpCAM

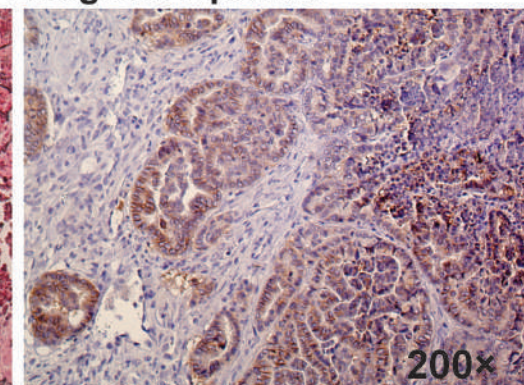

Allograft AFP

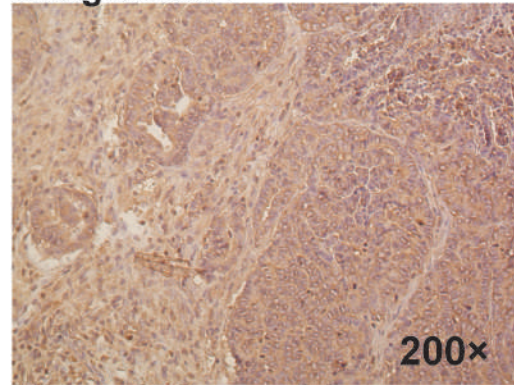

Allograft: CK19

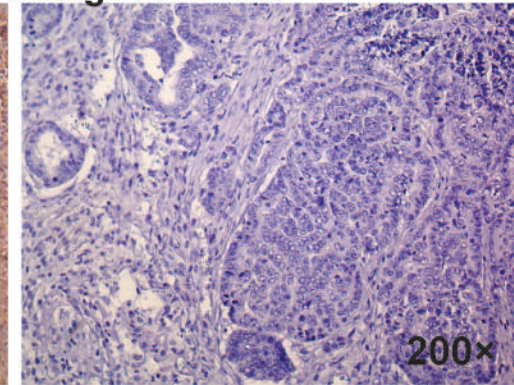

Allograft: GFP

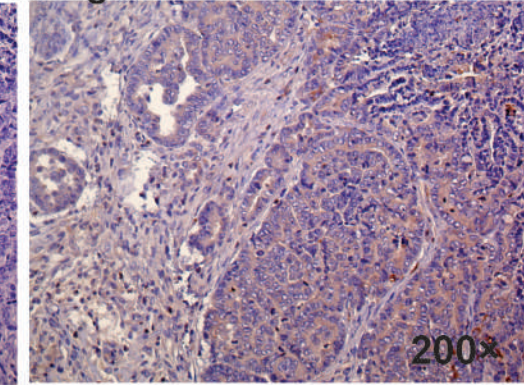

Allograft Organoid

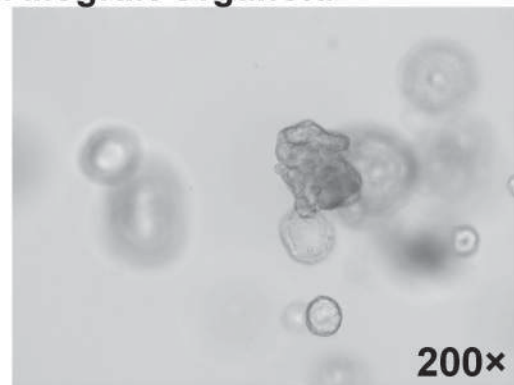

Allograft tumor type: CC/CHC



# AL46

Primary: H&E

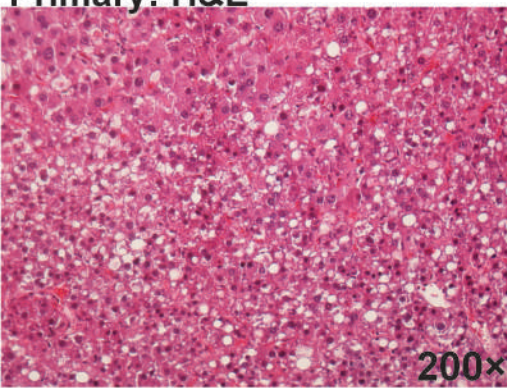

Primary: Gomori

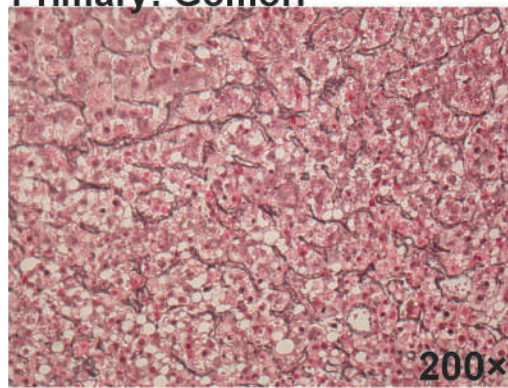

Primary: EpCAM

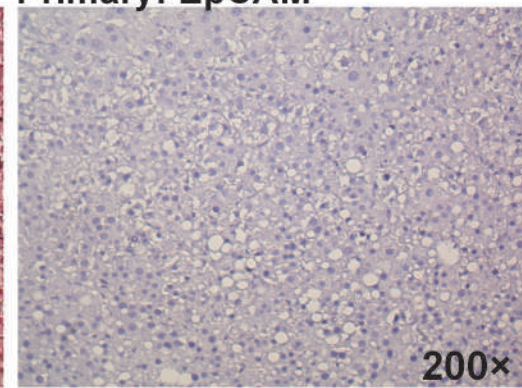

Primary: AFP

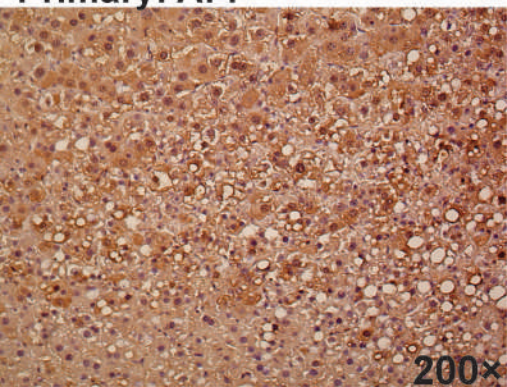

Primary: CK19

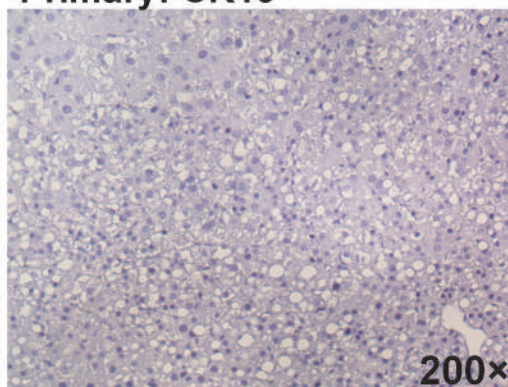

Primary: GFP

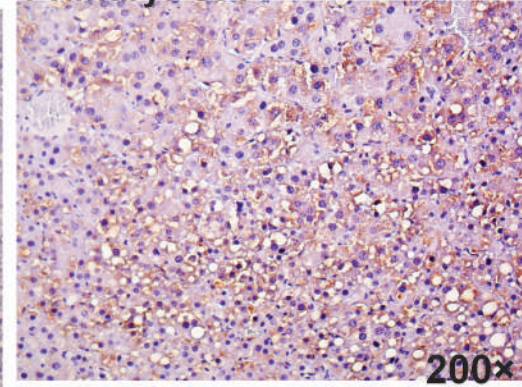

Allograft: H&E

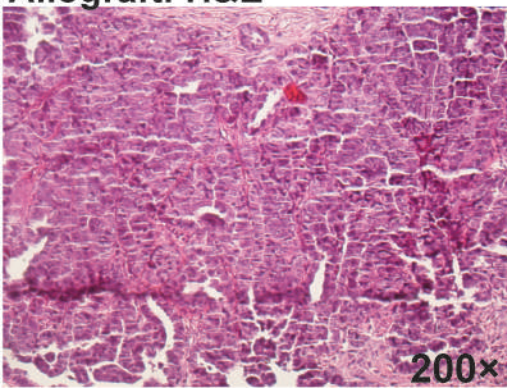

Allograft: Gomori

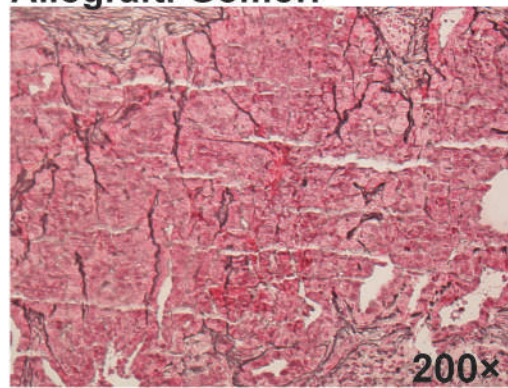

Allograft: EpCAM

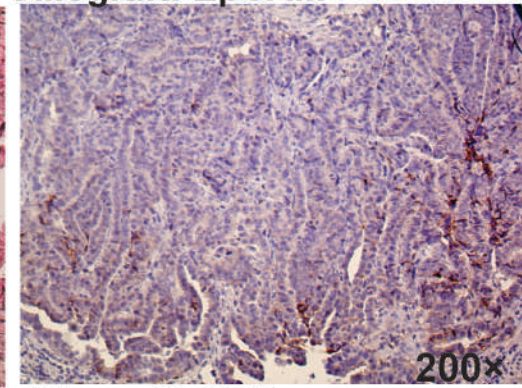

Allograft AFP

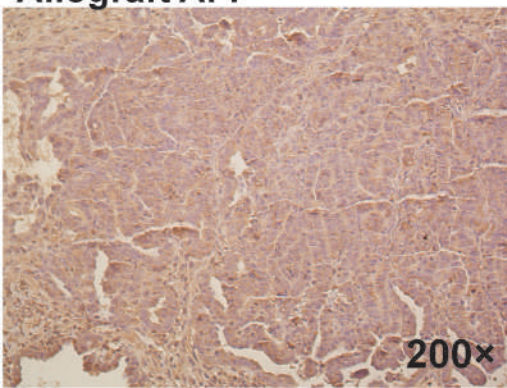

Allograft: CK19

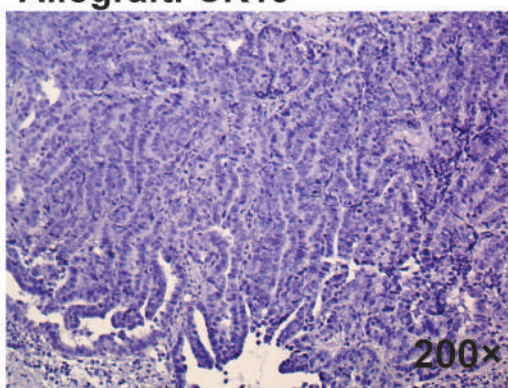

Allograft: GFP

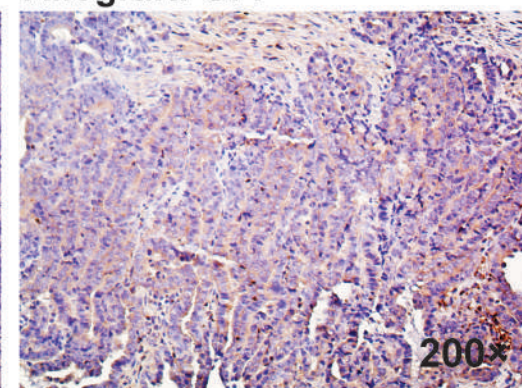

Allograft Organoid

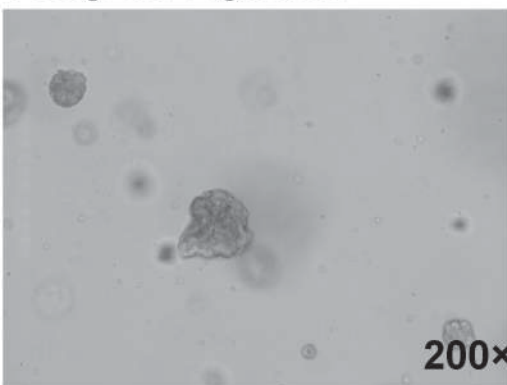

Allograft tumor type: CC/CHC



# AL61

Primary: H&E

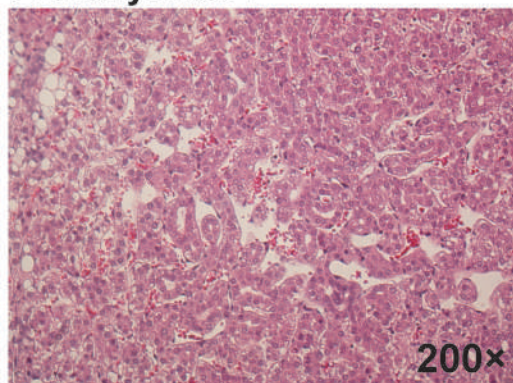

Primary: Gomori

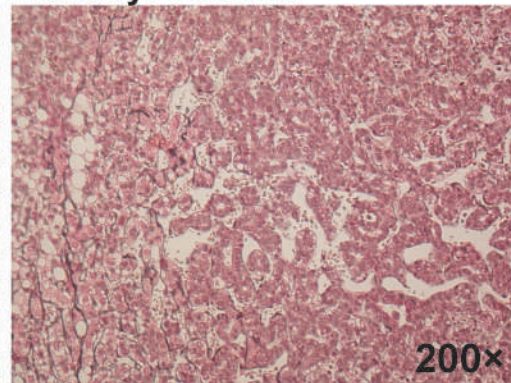

Primary: EpCAM

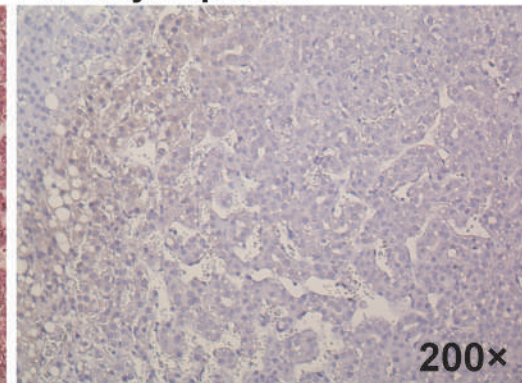

Primary: AFP

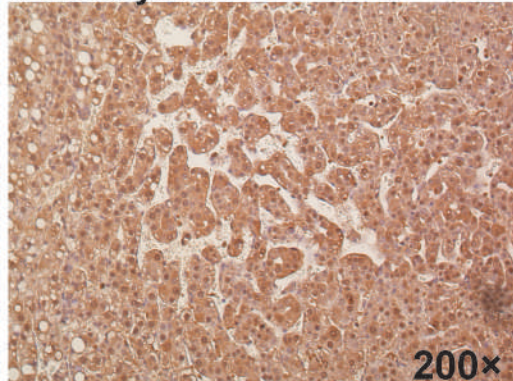

Primary: CK19

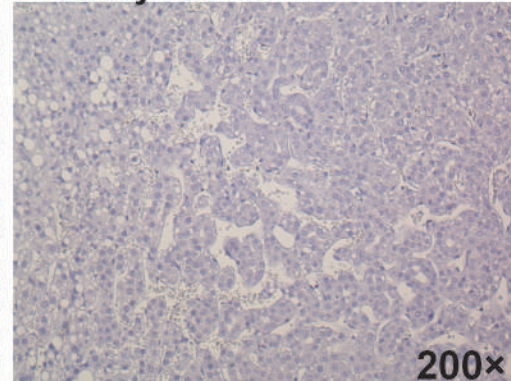

Primary: GFP

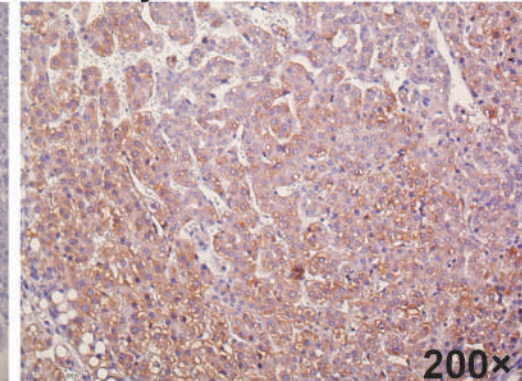

Allograft: H&E

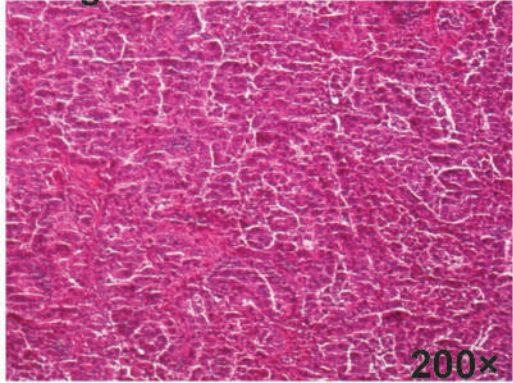

Allograft: Gomori

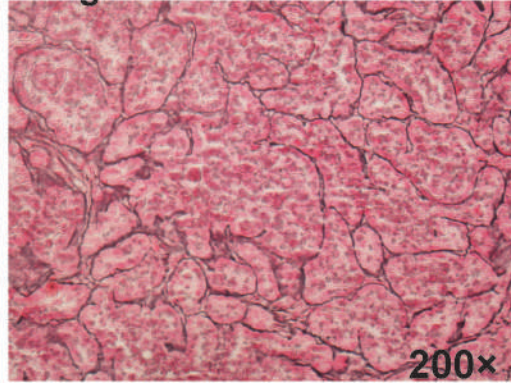

Allograft: EpCAM

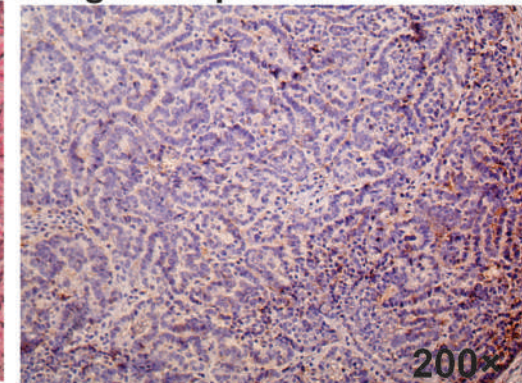

Allograft AFP

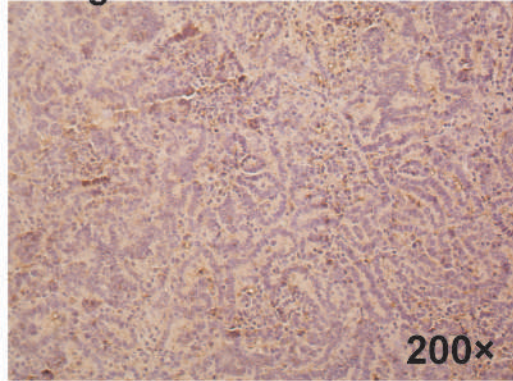

Allograft: CK19

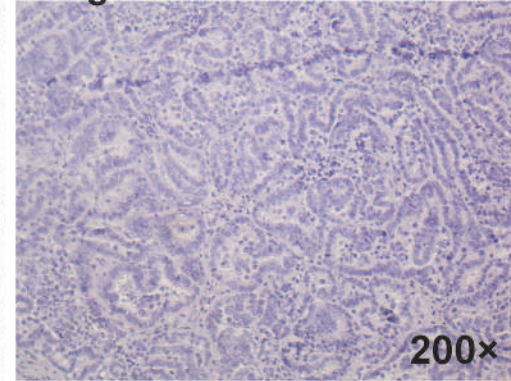

Allograft: GFP

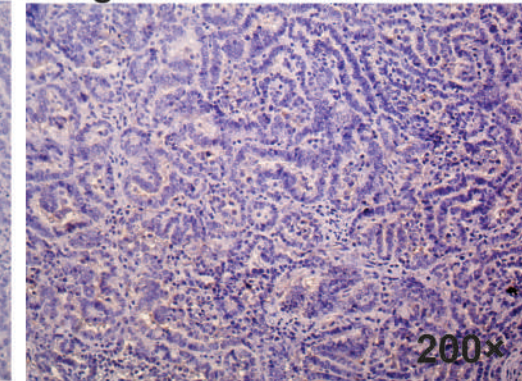

Allograft Organoid

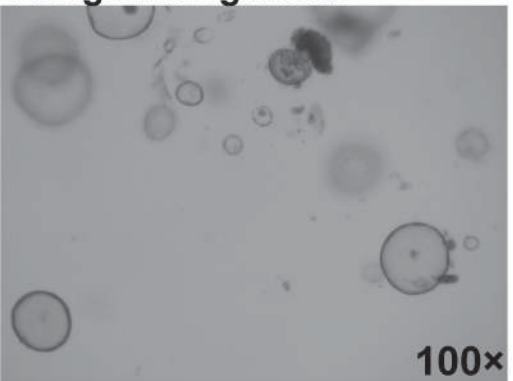

Allograft tumor type: CC/CHC



# AL62

Primary: H&E

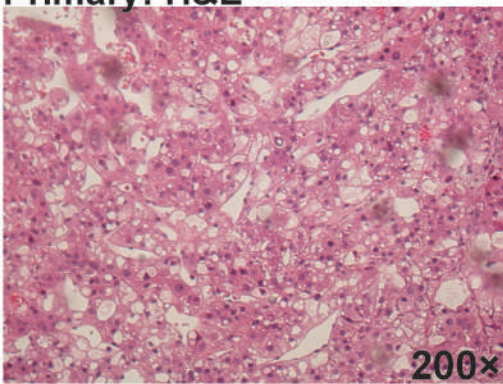

Primary: Gomori

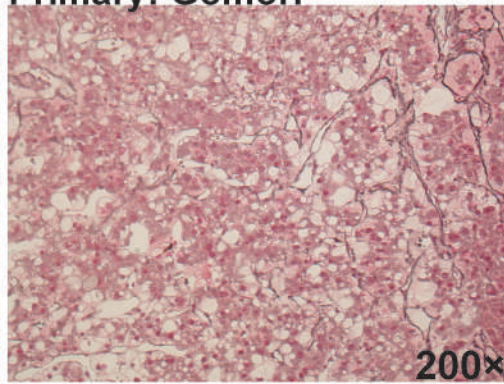

Primary: EpCAM

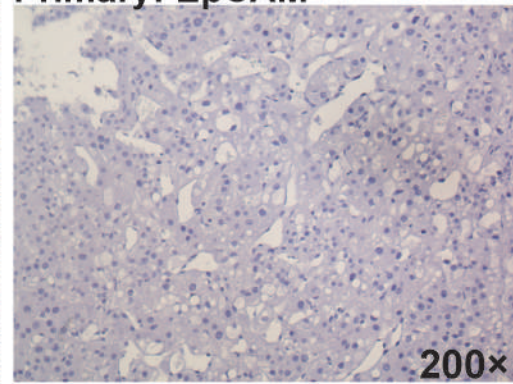

Primary: AFP

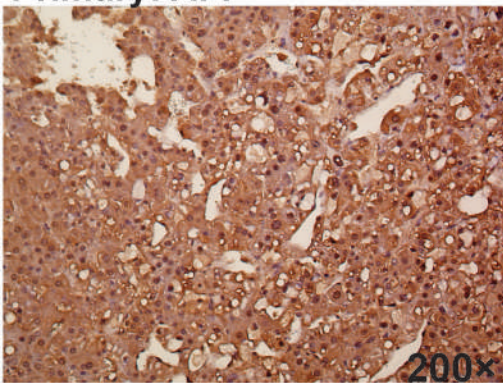

Primary: CK19

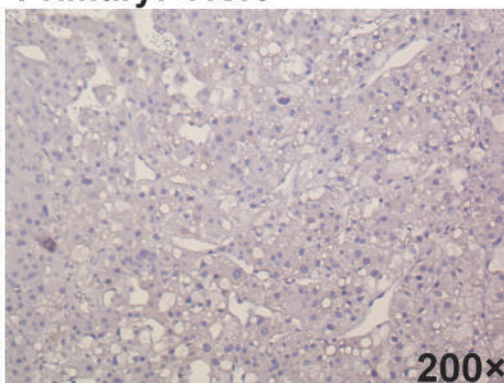

Primary: GFP

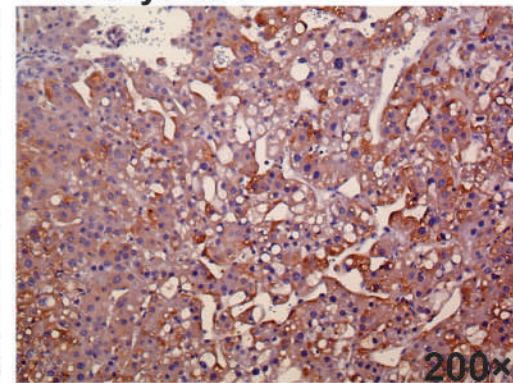

Allograft: H&E

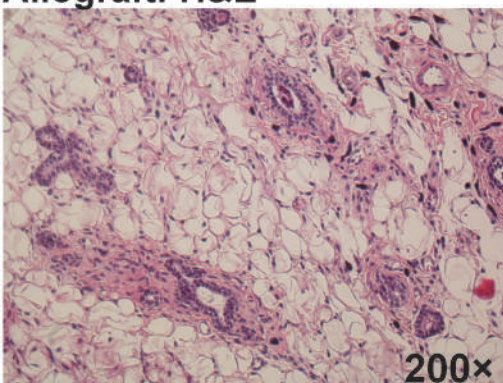

Allograft: Gomori

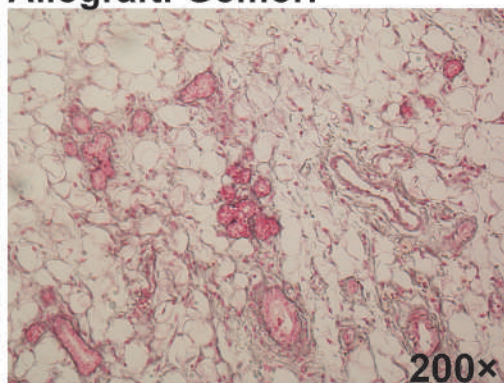

Allograft: EpCAM

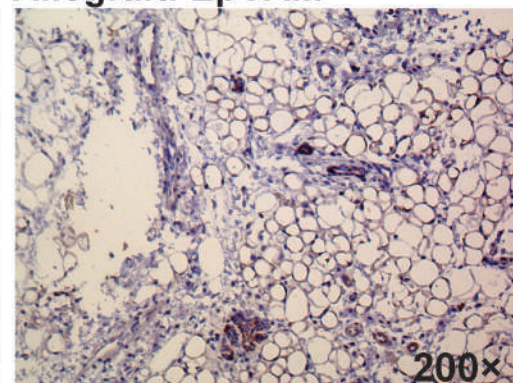

Allograft AFP

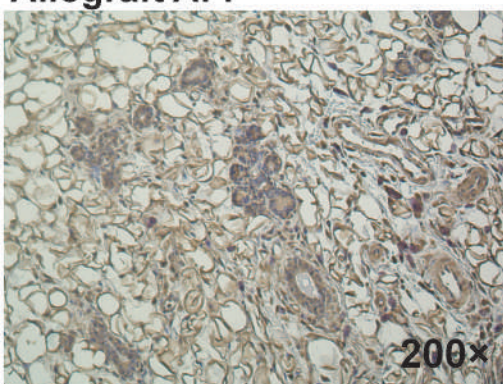

Allograft: CK19

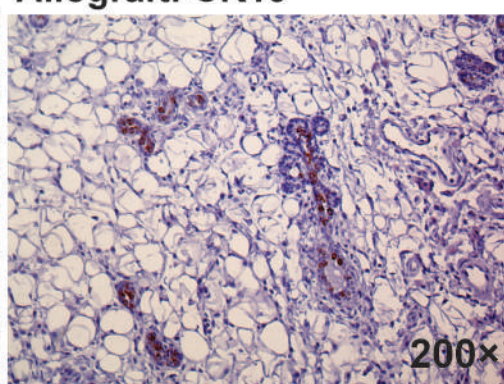

Allograft: GFP

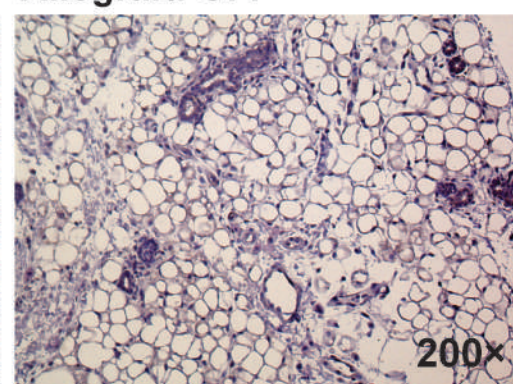

Allograft tumor type: unclear  
Strain lost due to stop proliferation ex vivo



# AL84

Primary: H&E

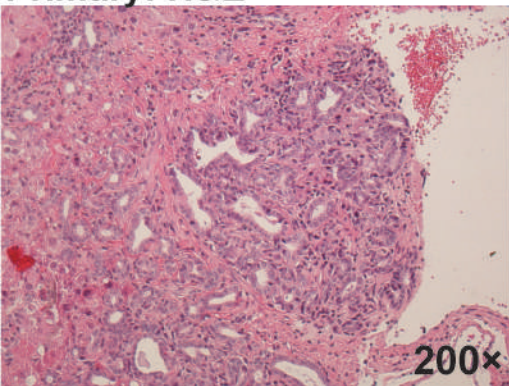

Primary: Gomori

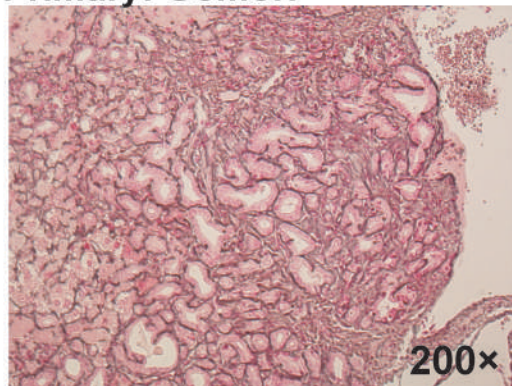

Primary: EpCAM

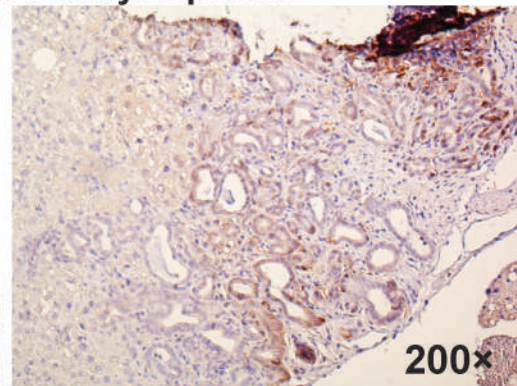

Primary: AFP

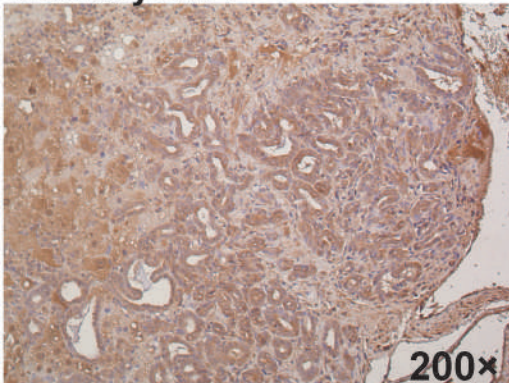

Primary: CK19

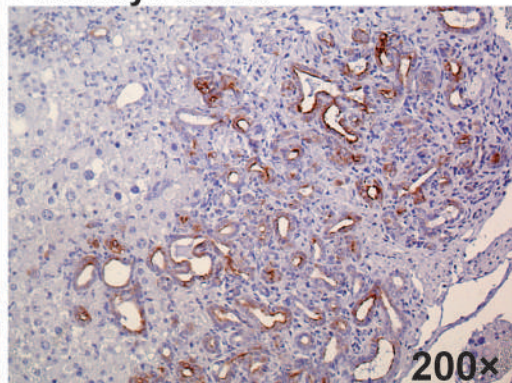

Primary: GFP

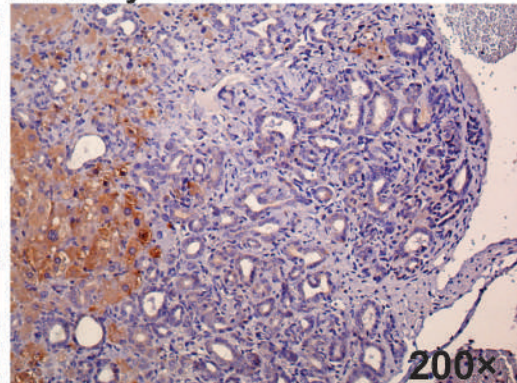

Allograft: H&E

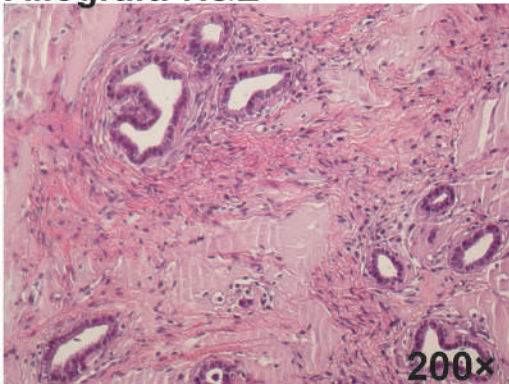

Allograft: Gomori

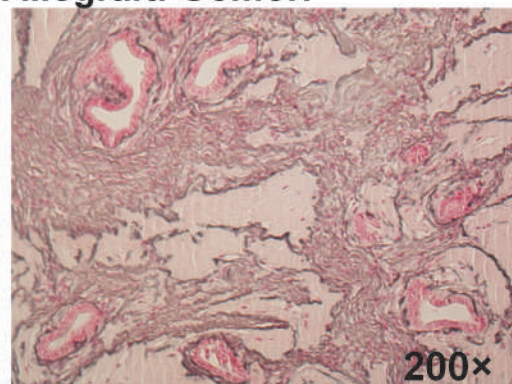

Allograft: EpCAM

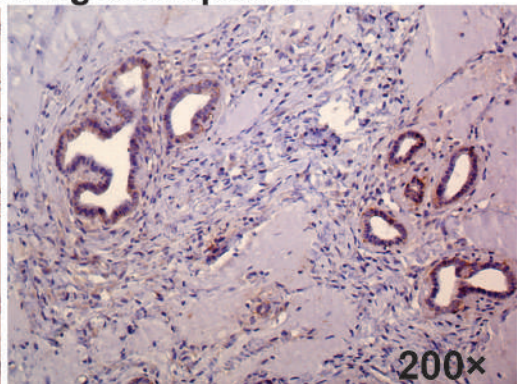

Allograft AFP

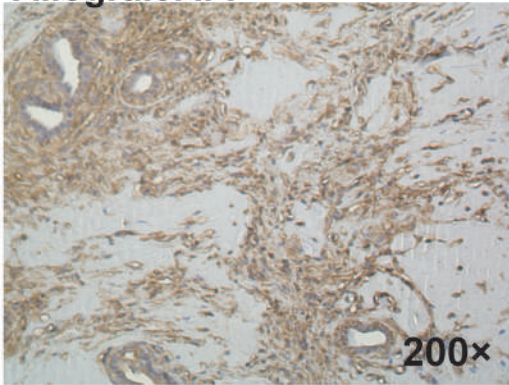

Allograft: CK19

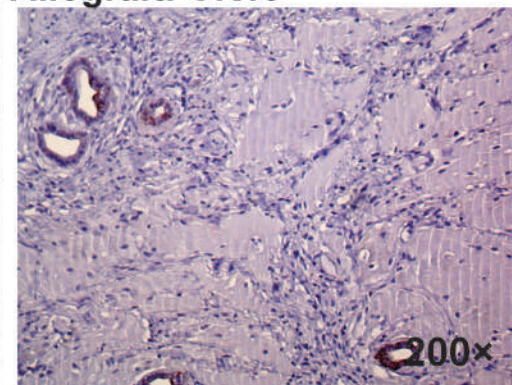

Allograft: GFP

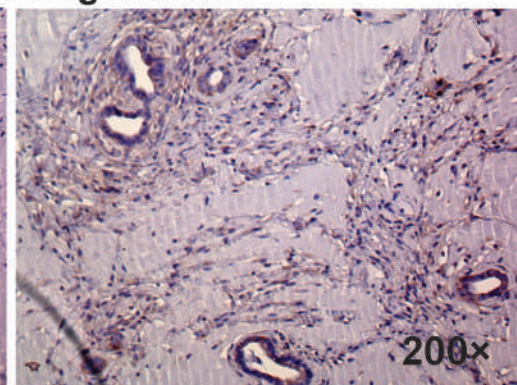

Allograft tumor type: CC

Strain lost due to stop proliferation ex vivo



# AL85

Primary: H&E

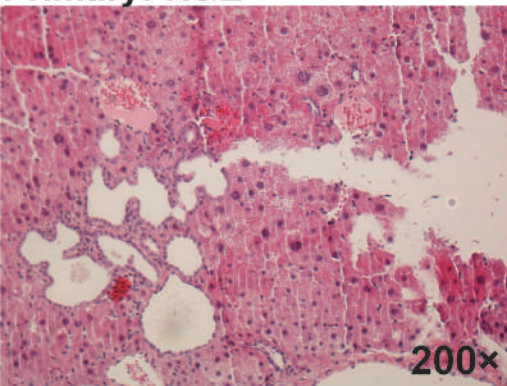

Primary: Gomori

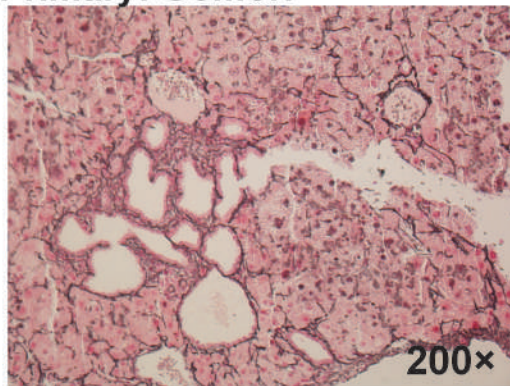

Primary: EpCAM

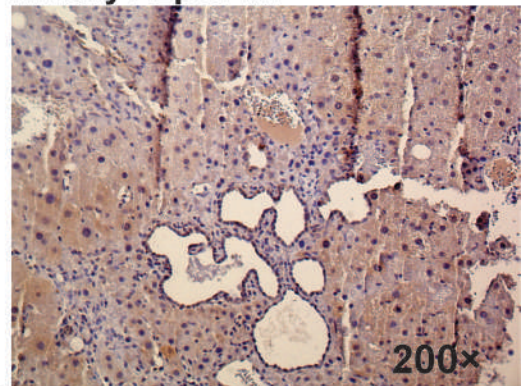

Primary: AFP

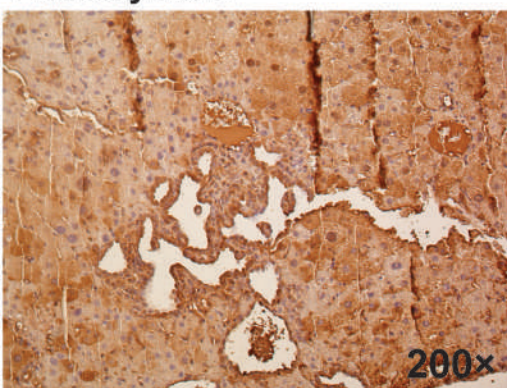

Primary: CK19

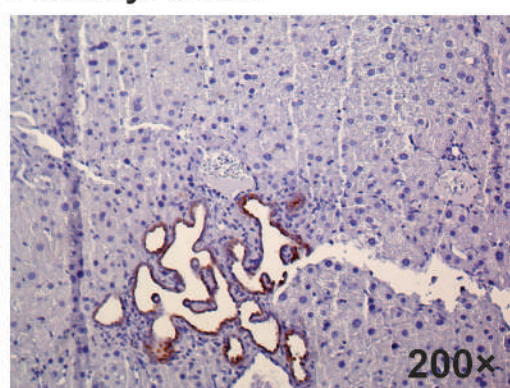

Primary: GFP

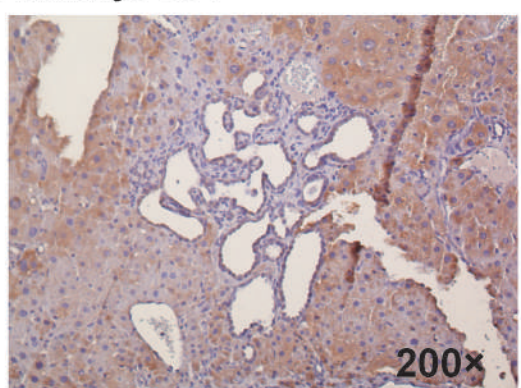

Primary Organoid

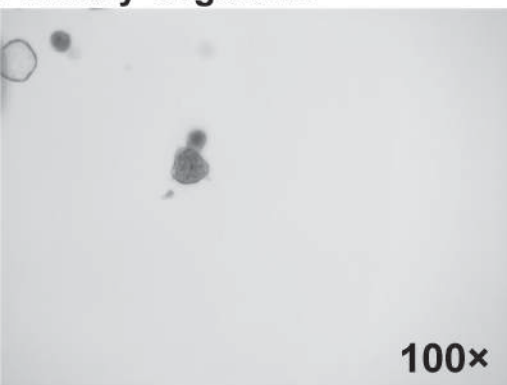

Allograft tumor type: Unclear

Strain lost due to stop proliferation ex vivo
