# Supplementary material for: LGR5 marks targetable tumor-initiating cells in mouse liver cancer
Source: PubMed Central journal article supplement (PMC7181628; doi:10.1038/s41467-020-15846-0), 2020-04-23
Supplement: 41467_2020_15846_MOESM7_ESM.pdf [file 41467_2020_15846_MOESM7_ESM.pdf]

## Untreated LGR5+ vs. LGR5-

| Upregulated Gene | Gene description                                       | Survival Analyses | P value for Survival Analyses |
|------------------|--------------------------------------------------------|-------------------|-------------------------------|
| Gm11042          |                                                        |                   |                               |
| AL589879.2       |                                                        |                   |                               |
| 1700003G13Rik    |                                                        |                   |                               |
| Snord93          |                                                        |                   |                               |
| Gm24325          |                                                        |                   |                               |
| Gm8326           |                                                        |                   |                               |
| Taf7l            | TATA-box binding protein associated factor 7 like      |                   | <b>0.0039</b>                 |
| Gm11977          |                                                        |                   |                               |
| Gm24328          |                                                        |                   |                               |
| Gm15558          |                                                        |                   |                               |
| B230112G18Rik    |                                                        |                   |                               |
| Gm42586          |                                                        |                   |                               |
| Rpl36-ps7        |                                                        |                   |                               |
| 2210017I01Rik    |                                                        |                   |                               |
| Gm43058          |                                                        |                   |                               |
| Gm38321          |                                                        |                   |                               |
| 4833428L15Rik    |                                                        |                   |                               |
| Tm6sf1           | Transmembrane 6 superfamily member 1                   |                   | <b>0.065</b>                  |
| Gm18014          |                                                        |                   |                               |
| Zfp572           | Zfp572 zinc finger protein 572                         |                   |                               |
| Kcnk4            | Potassium two pore domain channel subfamily K member 4 |                   |                               |

|                      |                                                                             |  |              |
|----------------------|-----------------------------------------------------------------------------|--|--------------|
| <b>Spn</b>           | <b>Sialophorin</b>                                                          |  | <b>0.040</b> |
| <b>Smtnl1</b>        | <b>Smoothelin like 1</b>                                                    |  | <b>0.22</b>  |
| <b>Gm12320</b>       |                                                                             |  |              |
| <b>Gm6976</b>        |                                                                             |  |              |
| <b>Gm24769</b>       |                                                                             |  |              |
| <b>Oas1h</b>         |                                                                             |  |              |
| <b>Tnfsfm13</b>      | <b>tumor necrosis factor (ligand) superfamily, membrane-bound member 13</b> |  |              |
| <b>Gm12227</b>       |                                                                             |  |              |
| <b>Gm12196</b>       |                                                                             |  |              |
| <b>Gm6568</b>        |                                                                             |  |              |
| <b>Gm15862</b>       |                                                                             |  |              |
| <b>Pitx3</b>         | <b>Paired like homeodomain 3</b>                                            |  |              |
| <b>Rln1</b>          | <b>Relaxin 1</b>                                                            |  |              |
| <b>Fpr1</b>          | <b>Formyl peptide receptor 1</b>                                            |  | <b>0.20</b>  |
| <b>4933429H19Rik</b> |                                                                             |  |              |
| <b>RP24-530N5.5</b>  |                                                                             |  |              |
| <b>Gm26899</b>       |                                                                             |  |              |
| <b>Ube4bos3</b>      |                                                                             |  |              |
| <b>Gm25445</b>       |                                                                             |  |              |
| <b>4933402D24Rik</b> |                                                                             |  |              |
| <b>Mmp8</b>          | <b>Matrix</b>                                                               |  |              |

|                      |                                                         |  |               |
|----------------------|---------------------------------------------------------|--|---------------|
|                      | <b>metallopeptidase 8</b>                               |  |               |
| <b>2300005B03Rik</b> |                                                         |  |               |
| <b>Fabp2</b>         | <b>Fatty acid binding protein 2</b>                     |  |               |
| <b>4930562D21Rik</b> |                                                         |  |               |
| <b>Gm38058</b>       |                                                         |  |               |
| <b>Sox2</b>          | <b>SRY-box 2</b>                                        |  | <b>0.018</b>  |
| <b>Gm4795</b>        |                                                         |  |               |
| <b>Gm12043</b>       |                                                         |  |               |
| <b>Dsg4</b>          | <b>membrane proteins</b>                                |  | <b>0.056</b>  |
| <b>Gm15780</b>       |                                                         |  |               |
| <b>Pnp2</b>          | <b>Purine nucleoside phosphorylase</b>                  |  |               |
| <b>Mcpt8</b>         | <b>mast cell protease 8</b>                             |  |               |
| <b>Nid1</b>          | <b>Nidogen-1</b>                                        |  | <b>0.0024</b> |
| <b>Tshr</b>          | <b>Thyroid stimulating hormone receptor</b>             |  |               |
| <b>Dnajb8</b>        | <b>DnaJ heat shock protein family (Hsp40) member B8</b> |  |               |
| <b>Nlrp4c</b>        | <b>NACHT, LRR and PYD domains-containing protein 4C</b> |  |               |
| <b>Gm10392</b>       |                                                         |  |               |
| <b>Sstr1</b>         | <b>Somatostatin</b>                                     |  |               |

|                      |                                          |  |              |
|----------------------|------------------------------------------|--|--------------|
|                      | <b>receptor 1</b>                        |  |              |
| <b>Gm13578</b>       |                                          |  |              |
| <b>Gm14822</b>       |                                          |  |              |
| <b>Erich5</b>        | <b>Glutamate rich 5</b>                  |  | <b>0.087</b> |
| <b>Gm18301</b>       |                                          |  |              |
| <b>6430571L13Rik</b> |                                          |  |              |
| <b>Gm11465</b>       |                                          |  |              |
| <b>Gm15982</b>       |                                          |  |              |
| <b>Nkd2</b>          | <b>Naked cuticle homolog 2</b>           |  |              |
| <b>Myl4</b>          | <b>Myosin light chain 4</b>              |  |              |
| <b>Gm15964</b>       |                                          |  |              |
| <b>Gm42807</b>       |                                          |  |              |
| <b>Gm9765</b>        |                                          |  |              |
| <b>Gm16177</b>       |                                          |  |              |
| <b>Klhl3</b>         | <b>Kelch like family member 3</b>        |  | <b>0.062</b> |
| <b>1700031P21Rik</b> |                                          |  |              |
| <b>Gm24336</b>       |                                          |  |              |
| <b>Palm3</b>         | <b>Paralemmin 3</b>                      |  | <b>0.047</b> |
| <b>Gm14019</b>       |                                          |  |              |
| <b>Gm13110</b>       |                                          |  |              |
| <b>Gm42682</b>       |                                          |  |              |
| <b>Slc16a9</b>       | <b>Solute carrier family 16 member 9</b> |  |              |

|                      |                                                             |  |               |
|----------------------|-------------------------------------------------------------|--|---------------|
| <b>Ambp</b>          | <b>Alpha-1-microglobulin/bikunin precursor</b>              |  | <b>0.001</b>  |
| <b>Gm37229</b>       |                                                             |  |               |
| <b>Gm11764</b>       |                                                             |  |               |
| <b>3110035E14Rik</b> |                                                             |  |               |
| <b>Gm6526</b>        |                                                             |  |               |
| <b>Gm10030</b>       |                                                             |  |               |
| <b>Mboat4</b>        | <b>Membrane bound O-acyltransferase domain containing 4</b> |  | <b>0.0019</b> |
| <b>Gm14379</b>       |                                                             |  |               |
| <b>Cma1</b>          | <b>Chymase 1</b>                                            |  | <b>0.015</b>  |
| <b>1600002D24Rik</b> |                                                             |  |               |
| <b>Gm5093</b>        |                                                             |  |               |
| <b>Cd300lg</b>       | <b>CD300 molecule like family member g</b>                  |  |               |
| <b>Rab37</b>         | <b>RAB37, member RAS oncogene family</b>                    |  | <b>0.17</b>   |
| <b>Gm28177</b>       |                                                             |  |               |
| <b>Gm42500</b>       |                                                             |  |               |
| <b>Hlx</b>           | <b>H2.0 like homeobox</b>                                   |  |               |

|                      |                                    |  |  |
|----------------------|------------------------------------|--|--|
| <b>Gm6226</b>        |                                    |  |  |
| <b>Gm37933</b>       |                                    |  |  |
| <b>Rai2</b>          | <b>Retinoic acid induced<br/>2</b> |  |  |
| <b>Gm20056</b>       |                                    |  |  |
| <b>RP24-83C9.5</b>   |                                    |  |  |
| <b>Lyz2</b>          | <b>Lysozyme C-2</b>                |  |  |
| <b>1700003M07Rik</b> |                                    |  |  |
| <b>Gm5909</b>        |                                    |  |  |
| <b>Gm27033</b>       |                                    |  |  |
| <b>Gm13448</b>       |                                    |  |  |
| <b>Npm3-ps1</b>      |                                    |  |  |

| Down regulated Gene | Gene description                                                    | Survival Analyses                                                                    | P value for Survival Analyses |
|---------------------|---------------------------------------------------------------------|--------------------------------------------------------------------------------------|-------------------------------|
| Gm12331             |                                                                     |                                                                                      |                               |
| Slc5a4b             | Solute carrier family 5 (neutral amino acid transporters, system A) |                                                                                      |                               |
| Defa-rs7            |                                                                     |                                                                                      |                               |
| Cks1brt             | Cyclin-dependent kinases regulatory subunit 1                       |                                                                                      |                               |
| Gm12868             |                                                                     |                                                                                      |                               |
| Gm7583              |                                                                     |                                                                                      |                               |
| Gm973               |                                                                     |                                                                                      |                               |
| Gm11401             |                                                                     |                                                                                      |                               |
| Gm17689             |                                                                     |                                                                                      |                               |
| Gm12583             |                                                                     |                                                                                      |                               |
| Gm14894             |                                                                     |                                                                                      |                               |
| Gm8101              |                                                                     |                                                                                      |                               |
| Gm13313             |                                                                     |                                                                                      |                               |
| Gm15516             |                                                                     |                                                                                      |                               |
| 1700058P15Rik       |                                                                     |                                                                                      |                               |
| RP23-133N24.2       |                                                                     |                                                                                      |                               |
| Gata5os             |                                                                     |                                                                                      |                               |
| RP23-298C3.14       |                                                                     |                                                                                      |                               |
| Nxf3                | Nuclear RNA export factor 3                                         | 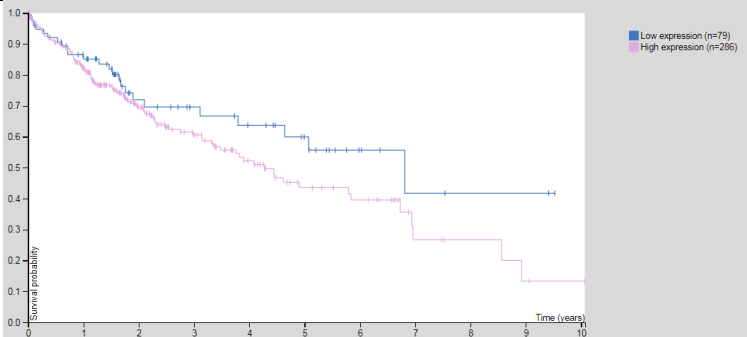 | <b>0.12</b>                   |
| Rgs5                | Regulator of G-protein signaling 5                                  |  | <b>0.017</b>                  |
| Gm16226             |                                                                     |                                                                                      |                               |
| Gm43216             |                                                                     |                                                                                      |                               |
| RP23-64D23.6        |                                                                     |                                                                                      |                               |
| Gm11869             |                                                                     |                                                                                      |                               |
| Gm27857             |                                                                     |                                                                                      |                               |
| Gm14435             |                                                                     |                                                                                      |                               |

|                |                                                                        |  |               |
|----------------|------------------------------------------------------------------------|--|---------------|
| <b>Gdap11</b>  | <b>Ganglioside induced differentiation associated protein 1 like 1</b> |  | <b>0.065</b>  |
| <b>Cyp4x1</b>  | <b>Cytochrome P450 family 4 subfamily X member 1</b>                   |  | <b>0.23</b>   |
| <b>Gm11453</b> |                                                                        |  |               |
| <b>Kcnk6</b>   | <b>Potassium two pore domain channel subfamily K member 6</b>          |  | <b>0.19</b>   |
| <b>Sebox</b>   | <b>SEBOX homeobox</b>                                                  |  | <b>0.087</b>  |
| <b>Fmo2</b>    | <b>Flavin containing monooxygenase 2</b>                               |  | <b>0.0017</b> |
| <b>Gm9003</b>  |                                                                        |  |               |
| <b>Gm26175</b> |                                                                        |  |               |



|               |                                            |                                                                                      |              |
|---------------|--------------------------------------------|--------------------------------------------------------------------------------------|--------------|
| Gm26353       |                                            |                                                                                      |              |
| Gm22656       |                                            |                                                                                      |              |
| Gm12042       |                                            |                                                                                      |              |
| RP24-127M20.6 |                                            |                                                                                      |              |
| n-R5s27       |                                            |                                                                                      |              |
| Gm19620       |                                            |                                                                                      |              |
| Trdv4         | T cell receptor delta variable 4           |                                                                                      |              |
| Gm13511       |                                            |                                                                                      |              |
| D630029K05Rik |                                            |                                                                                      |              |
| Gm16581       |                                            |                                                                                      |              |
| Gm38344       |                                            |                                                                                      |              |
| Gm26530       |                                            |                                                                                      |              |
| Rpl21-ps7     |                                            |                                                                                      |              |
| Gm26728       |                                            |                                                                                      |              |
| Mir7662       |                                            |                                                                                      |              |
| Zfp872        | zinc finger protein 872                    |                                                                                      |              |
| Gm17281       |                                            |                                                                                      |              |
| Gm30667       |                                            |                                                                                      |              |
| Gm26850       |                                            |                                                                                      |              |
| B230322F03Rik |                                            |                                                                                      |              |
| Gm37932       |                                            |                                                                                      |              |
| Mir322        |                                            |                                                                                      |              |
| Scrt2         | Scratch family transcriptional repressor 2 |                                                                                      |              |
| Defb1         | Defensin beta 1                            | 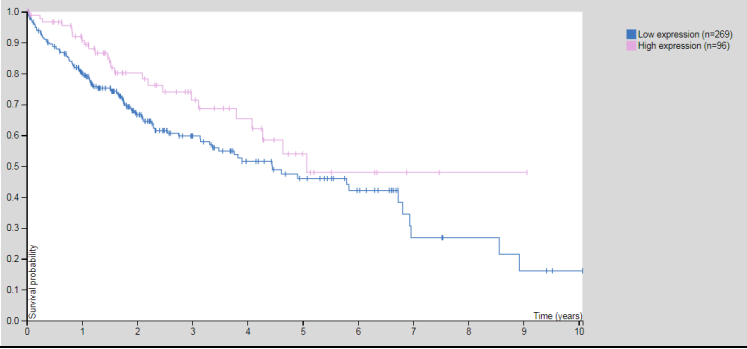 | <b>0.044</b> |
| Lect2         | Leukocyte cell derived chemotaxin 2        |                                                                                      |              |
| Hist2h2bb     |                                            |                                                                                      |              |
| Gm1848        |                                            |                                                                                      |              |
| Asic2         | Acid sensing ion channel subunit 2         |  | <b>0.049</b> |

|                             |                                                             |  |                         |
|-----------------------------|-------------------------------------------------------------|--|-------------------------|
| <p><b>Lhx4</b></p>          | <p><b>LIM homeobox 4</b></p>                                |  | <p><b>0.00094</b></p>   |
| <p><b>Sec14l4</b></p>       | <p><b>SEC14 like lipid binding 4</b></p>                    |  | <p><b>0.099</b></p>     |
| <p><b>Hsf5</b></p>          | <p><b>Heat shock transcription factor 5</b></p>             |  | <p><b>0.042</b></p>     |
| <p><b>1700047N06Rik</b></p> |                                                             |  |                         |
| <p><b>Celsr3</b></p>        | <p><b>Cadherin EGF LAG seven-pass G-type receptor 3</b></p> |  | <p><b>0.0000036</b></p> |
| <p><b>Saa1</b></p>          | <p><b>Serum amyloid A1</b></p>                              |  | <p><b>0.016</b></p>     |
| <p><b>Gm2147</b></p>        |                                                             |  |                         |
| <p><b>Gm16416</b></p>       |                                                             |  |                         |

|                     |                                                              |  |                |
|---------------------|--------------------------------------------------------------|--|----------------|
| <b>Gp1ba</b>        | <b>Glycoprotein Ib platelet alpha subunit</b>                |  |                |
| <b>Gm26854</b>      |                                                              |  |                |
| <b>Gm11975</b>      |                                                              |  |                |
| <b>Cpxm2</b>        |                                                              |  |                |
| <b>Adcy4</b>        | <b>Adenylate cyclase 4</b>                                   |  | <b>0.00018</b> |
| <b>Gm43578</b>      |                                                              |  |                |
| <b>Gm23301</b>      |                                                              |  |                |
| <b>Kcnj10</b>       | <b>Potassium voltage-gated channel subfamily J member 10</b> |  | <b>0.20</b>    |
| <b>Fgr</b>          | <b>FGR proto-oncogene, Src family tyrosine kinase</b>        |  | <b>0.058</b>   |
| <b>Gm42503</b>      |                                                              |  |                |
| <b>RP23-296N5.4</b> |                                                              |  |                |
| <b>Sct</b>          | <b>Secretin</b>                                              |  | <b>0.0024</b>  |
| <b>Gm6583</b>       |                                                              |  |                |
| <b>Gm2199</b>       |                                                              |  |                |

|                     |                                             |  |             |
|---------------------|---------------------------------------------|--|-------------|
| <b>Gm43110</b>      |                                             |  |             |
| <b>Gm43702</b>      |                                             |  |             |
| <b>RP23-304D1.6</b> |                                             |  |             |
| <b>Cilp</b>         | <b>Cartilage intermediate layer protein</b> |  | <b>0.26</b> |
| <b>Gm26394</b>      |                                             |  |             |
