# Supplementary material for: LGR5 marks targetable tumor-initiating cells in mouse liver cancer
Source: PubMed Central journal article supplement (PMC7181628; doi:10.1038/s41467-020-15846-0), 2020-04-23
Supplement: 41467_2020_15846_MOESM9_ESM.pdf [file 41467_2020_15846_MOESM9_ESM.pdf]

|   | Tissue Code | Injected Cell Type      | Injected Cell Number | Tumor initiation |
|---|-------------|-------------------------|----------------------|------------------|
| 1 | PT47        | LGR5 <sup>+</sup> cells | 3000                 | no               |
|   |             | LGR5 <sup>-</sup> cells | 3000                 | no               |
| 2 | PT50        | LGR5 <sup>+</sup> cells | 2000                 | SAL1             |
|   |             | LGR5 <sup>-</sup> cells | 2000                 | SAL2             |
| 3 | PT63        | LGR5 <sup>+</sup> cells | 2000                 | SAL3             |
|   |             | LGR5 <sup>-</sup> cells | 2000                 | no               |
| 4 | PT65        | LGR5 <sup>+</sup> cells | 6000                 | no               |
|   |             | LGR5 <sup>-</sup> cells | 6000                 | no               |
| 5 | PT67        | LGR5 <sup>+</sup> cells | 1000                 | no               |
|   |             | LGR5 <sup>-</sup> cells | 1000                 | no               |
| 6 | PT68        | LGR5 <sup>+</sup> cells | 16000                | SAL4             |
|   |             | LGR5 <sup>-</sup> cells | 16000                | no               |
| 7 | PT72        | LGR5 <sup>+</sup> cells | 5000                 | no               |
|   |             | LGR5 <sup>-</sup> cells | 5000                 | no               |
| 8 | PT73        | LGR5 <sup>+</sup> cells | 1000                 | no               |
|   |             | LGR5 <sup>-</sup> cells | 1000                 | no               |
| 9 | PT85        | LGR5 <sup>+</sup> cells | 3000                 | no               |
|   |             | LGR5 <sup>-</sup> cells | 3000                 | no               |

| Tissue code | Primary tumor                                                                       | Allograft Tumor                                                                       |
|-------------|-------------------------------------------------------------------------------------|---------------------------------------------------------------------------------------|
| SAL1        |    |    |
| SAL2        |   |   |
| SAL3        | Picture lacking                                                                     |  |
| SAL4        |  |  |
