# Supplementary material for: LGR5 marks targetable tumor-initiating cells in mouse liver cancer
Source: PubMed Central journal article supplement (PMC7181628; doi:10.1038/s41467-020-15846-0), 2020-04-23
Supplement: 41467_2020_15846_MOESM10_ESM.pdf [file 41467_2020_15846_MOESM10_ESM.pdf]

## Reporting Summary

Nature Research wishes to improve the reproducibility of the work that we publish. This form provides structure for consistency and transparency in reporting. For further information on Nature Research policies, see [Authors & Referees](#) and the [Editorial Policy Checklist](#).

### Statistics

For all statistical analyses, confirm that the following items are present in the figure legend, table legend, main text, or Methods section.

n/a Confirmed

- |                                     |                                     |                                                                                                                                                                                                                                                            |
|-------------------------------------|-------------------------------------|------------------------------------------------------------------------------------------------------------------------------------------------------------------------------------------------------------------------------------------------------------|
| <input type="checkbox"/>            | <input checked="" type="checkbox"/> | The exact sample size ( $n$ ) for each experimental group/condition, given as a discrete number and unit of measurement                                                                                                                                    |
| <input type="checkbox"/>            | <input checked="" type="checkbox"/> | A statement on whether measurements were taken from distinct samples or whether the same sample was measured repeatedly                                                                                                                                    |
| <input type="checkbox"/>            | <input checked="" type="checkbox"/> | The statistical test(s) used AND whether they are one- or two-sided<br><i>Only common tests should be described solely by name; describe more complex techniques in the Methods section.</i>                                                               |
| <input type="checkbox"/>            | <input checked="" type="checkbox"/> | A description of all covariates tested                                                                                                                                                                                                                     |
| <input type="checkbox"/>            | <input checked="" type="checkbox"/> | A description of any assumptions or corrections, such as tests of normality and adjustment for multiple comparisons                                                                                                                                        |
| <input type="checkbox"/>            | <input checked="" type="checkbox"/> | A full description of the statistical parameters including central tendency (e.g. means) or other basic estimates (e.g. regression coefficient) AND variation (e.g. standard deviation) or associated estimates of uncertainty (e.g. confidence intervals) |
| <input type="checkbox"/>            | <input checked="" type="checkbox"/> | For null hypothesis testing, the test statistic (e.g. $F$ , $t$ , $r$ ) with confidence intervals, effect sizes, degrees of freedom and $P$ value noted<br><i>Give <math>P</math> values as exact values whenever suitable.</i>                            |
| <input checked="" type="checkbox"/> | <input type="checkbox"/>            | For Bayesian analysis, information on the choice of priors and Markov chain Monte Carlo settings                                                                                                                                                           |
| <input checked="" type="checkbox"/> | <input type="checkbox"/>            | For hierarchical and complex designs, identification of the appropriate level for tests and full reporting of outcomes                                                                                                                                     |
| <input checked="" type="checkbox"/> | <input type="checkbox"/>            | Estimates of effect sizes (e.g. Cohen's $d$ , Pearson's $r$ ), indicating how they were calculated                                                                                                                                                         |

*Our web collection on [statistics for biologists](#) contains articles on many of the points above.*

### Software and code

Policy information about [availability of computer code](#)

Data collection

No software was used

Data analysis

No software was used

For manuscripts utilizing custom algorithms or software that are central to the research but not yet described in published literature, software must be made available to editors/reviewers. We strongly encourage code deposition in a community repository (e.g. GitHub). See the Nature Research [guidelines for submitting code & software](#) for further information.

### Data

Policy information about [availability of data](#)

All manuscripts must include a [data availability statement](#). This statement should provide the following information, where applicable:

- Accession codes, unique identifiers, or web links for publicly available datasets
- A list of figures that have associated raw data
- A description of any restrictions on data availability

The RNA-seq data have been deposited in the GEO database under the accession code GSE137517. The human LGR5 expression and HCC mutation data referenced during the study are available in a public repository from the TCGA and LICA database. The source data underlying Figs. 1c-d, 2, 3e, 4d, f, h, i, p, 5b, f, h-i, 6c, h, l, 7b, c, f, g, 8b, c, f, g and Supplementary Figs. 2a, g, 3, 4, 6b-c, 7b-e, 8a-b, 9, 10c-d, 11, 12a-b and 13g-h are provided as a Source Data file. All the other data supporting the findings of this study are available within the article and its supplementary information files and from the corresponding author upon reasonable request. A reporting summary for this article is available as a Supplementary Information file.

## Field-specific reporting

Please select the one below that is the best fit for your research. If you are not sure, read the appropriate sections before making your selection.

- Life sciences       Behavioural & social sciences       Ecological, evolutionary & environmental sciences

For a reference copy of the document with all sections, see [nature.com/documents/nr-reporting-summary-flat.pdf](https://www.nature.com/documents/nr-reporting-summary-flat.pdf)

## Life sciences study design

All studies must disclose on these points even when the disclosure is negative.

|                 |                                                                            |
|-----------------|----------------------------------------------------------------------------|
| Sample size     | Sample size is determined according to previous study.                     |
| Data exclusions | No data exclusions.                                                        |
| Replication     | All the measurements are replicated. The N is indicated in the manuscript. |
| Randomization   | Not relevant to the study                                                  |
| Blinding        | Not relevant to the study                                                  |

## Reporting for specific materials, systems and methods

We require information from authors about some types of materials, experimental systems and methods used in many studies. Here, indicate whether each material, system or method listed is relevant to your study. If you are not sure if a list item applies to your research, read the appropriate section before selecting a response.

### Materials & experimental systems

| n/a                                 | Involved in the study                                           |
|-------------------------------------|-----------------------------------------------------------------|
| <input type="checkbox"/>            | <input checked="" type="checkbox"/> Antibodies                  |
| <input checked="" type="checkbox"/> | <input type="checkbox"/> Eukaryotic cell lines                  |
| <input checked="" type="checkbox"/> | <input type="checkbox"/> Palaeontology                          |
| <input type="checkbox"/>            | <input checked="" type="checkbox"/> Animals and other organisms |
| <input checked="" type="checkbox"/> | <input type="checkbox"/> Human research participants            |
| <input checked="" type="checkbox"/> | <input type="checkbox"/> Clinical data                          |

### Methods

| n/a                                 | Involved in the study                              |
|-------------------------------------|----------------------------------------------------|
| <input checked="" type="checkbox"/> | <input type="checkbox"/> ChIP-seq                  |
| <input type="checkbox"/>            | <input checked="" type="checkbox"/> Flow cytometry |
| <input checked="" type="checkbox"/> | <input type="checkbox"/> MRI-based neuroimaging    |

## Antibodies

### Antibodies used

CD45(56-0451-82,eBioscience)  
 AFP(SAB3500533-100UG,Sigma)  
 HNF4a(ab41898,Abcam); EpCAM (ab71916, Abcam)  
 Cytokeratin 19(ab52625,Abcam)  
 GFP(A-11122; Invitrogen/Life Technologies)  
 Alexa Fluor® 488 AffiniPure Donkey Anti-Goat IgG (H+L) (705-545-147,Bio-Connect)  
 Donkey anti-Rabbit IgG (H+L) Secondary Antibody Alexa Fluor® 594 conjugate(R37119,Thermo fisher)  
 Donkey anti-mouse IgG (H+L) Secondary Antibody, Alexa Fluor® 594 conjugate(R37115, Thermo fisher)

### Validation

CD45: mouse, expel immune cells  
 AFP: mouse, hepatocyte/HCC straining  
 HNF4a: mouse, hepatocyte/HCC straining  
 EpCAM: mouse, indicate cholangiocyte/CC/CHC  
 Cytokeratin 19: mouse, indicate cholangiocyte/CC/CHC  
 GFP: mouse, indicate LGR5-GFP  
 Alexa Fluor® 488 AffiniPure Donkey Anti-Goat IgG (H+L) : mouse, secondary antibody  
 Donkey anti-Rabbit IgG (H+L) Secondary Antibody, Alexa Fluor® 594 conjugate: mouse, secondary antibody  
 Donkey anti-mouse IgG (H+L) Secondary Antibody, Alexa Fluor® 594 conjugate: mouse, secondary antibody

## Animals and other organisms

Policy information about [studies involving animals](#); [ARRIVE guidelines](#) recommended for reporting animal research

Laboratory animals

NOD.Cg-PrkdcSCIDIl2rgtm1Wjl/SzJ (NSG) mice: Female, Week 6-40  
 NOG/JicTac (CIEA NOD.Cg-Prkdc-scid Il2rg-tm1Sug) mice: Female, Week 6-40  
 Nude mice (NMRI:BomTac-Nude): Female, Week 6-40  
 LGR5-DTRGFP: Female/Male, Week 6-76

Wild animals

This study did not involve wide type animals.

Field-collected samples

This study did not involve samples collected from field.

Ethics oversight

The Committee on the Ethics of Animal Experiments of the Erasmus Medical Center

Note that full information on the approval of the study protocol must also be provided in the manuscript.

## Flow Cytometry

### Plots

Confirm that:

- The axis labels state the marker and fluorochrome used (e.g. CD4-FITC).
- The axis scales are clearly visible. Include numbers along axes only for bottom left plot of group (a 'group' is an analysis of identical markers).
- All plots are contour plots with outliers or pseudocolor plots.
- A numerical value for number of cells or percentage (with statistics) is provided.

### Methodology

Sample preparation

For FACS analysis, single cells derived from liver tumors/tumor surrounding tissues or organoids were suspended in DMEM plus 2% FBS. Cell suspensions were analyzed

Instrument

BD FACSAriaTM II

Software

BD FACSDIVA Software

Cell population abundance

The collected cells were re-measured to check the abundance.

Gating strategy

A figure exemplifying the gating strategy is provided in the Supplementary Information

- Tick this box to confirm that a figure exemplifying the gating strategy is provided in the Supplementary Information.
